# Supplementary material for: <strong>Psychosocial, and Socio-Economic Crisis in Bangladesh due to COVID-19 Pandemic: A Perception-Based Assessment</strong>
Source: Preprints.org preprint supplement (doi:10.20944/preprints202004.0398.v1), 2020-04-22
Supplement: Supplementary file 1 [file supplementary]

## Sheet: Table-S1_DS
Statistics
		I am most afraid of coronavirus recent outbreak in Bangladesh	I am afraid of getting coronavirus	I am afraid of losing my life or my relatives' life due to this outbreak	All the news and numbers of COVID-19 in different media increasing my tension	It makes me uncomfortable to be detached from regular activities	Health system of Bangladesh is fragile to deal with the recent outbreak of COVID-19	A huge population is a pressure to the existing health system to deal with COVID-19	There is a lack of awareness of basic health issues in most of the citizens of Bangladesh	There is a lack of trained doctors and health professional to deal with the COVID-19	There is a lack of health facilities to combat the COVID-19 outbreak in Bangladesh	There is a lack of health infrastructure to deal with COVID-19	There is a severe lack of bio-medical waste management facilities in Bangladesh	There is a lack of COVID-19 testing facility in Bangladesh	There is a lack of budget or financial support to response to this outbreak	Most of the poor people will not have access to existing health facilities if they are infected by COVID-19	Bangladesh government can deal with this outbreak	Government is taking this outbreak seriously to deal with	Government is taking proper decisions in the right time	Government is involving other sector actors to combat the COVID-19 outbreak	Government need support from the people to reduce the impact of COVID-19	Government need to formulate a policy and action plan and implement it immediately	The developed nations are going to support Bangladesh in response to COVID-19	Shut down or lockdown of regular activities is a good decision to reduce the chance of infection of COVID-19	Shut down or lockdown or social distancing will have an economic and social impact in future	The formal and informal business will be hampered	Poor people living in hand to mouth will be severely affected	Most of the poor people living in urban areas have to leave due to not having any options for income	Many people will lose their livelihood/ jobs at a time	There will be less supply of basic goods/ products for daily use	Price of most of the basic products will be higher than usual	Poor people will suffer food and nutritional deficiency	The formal education system will be hampered	There is a chance of social conflict due to this outbreak	There is a chance of community transmission of COVID-19 in Bangladesh	A huge number of people will be infected	There is a chance of not detecting most of the infected patients due to lack of health facilities leads to undermining the actual infected case	There is a chance to increase in the number of death for not having proper health facilities	Lack of bio-medical waste management facilities in Bangladesh will create more problem	There will be many people with psychosocially shocked due to this outbreak	The government will lose its trust to the people	There is a chance of disaster like flood, cyclone, drought etc. in 2020 considering the climate change vulnerability of Bangladesh	If any disaster (flood, cyclone etc.) occur after the COVID-19 situation then it will create a double burden to the country	There is a chance of severe food scarcity due to these events (COVID-19 + Disasters) in the country	High possibility of huge economical loss	High possibility of increasing the poverty level	High possibility of severe socio-economic and health crisis
N	Valid	1066	1066	1066	1066	1066	1066	1066	1066	1066	1066	1066	1066	1066	1066	1066	1066	1066	1066	1066	1066	1066	1066	1066	1066	1066	1066	1066	1066	1066	1066	1066	1066	1066	1066	1066	1066	1066	1066	1066	1066	1066	1066	1066	1066	1066	1066
	Missing	0	0	0	0	0	0	0	0	0	0	0	0	0	0	0	0	0	0	0	0	0	0	0	0	0	0	0	0	0	0	0	0	0	0	0	0	0	0	0	0	0	0	0	0	0	0		Sl.
Mean		4.152	3.8386	4.0854	4.0713	4.1951	4.3593	4.515	4.5488	4.227	4.6482	4.606	4.5694	4.7223	4.0544	4.6426	2.5056	2.7617	2.272	2.9794	4.5657	4.6754	3.4512	4.5338	4.5113	4.5084	4.788	4.4203	4.3621	4.1295	4.2889	4.6013	4.379	3.9024	4.3893	4.2083	4.5572	4.5629	4.5066	4.2842	3.8293	3.6979	4.6501	4.3002	4.5901	4.4306	4.485		1
Std. Error of Mean		0.03101	0.03308	0.0333	0.03219	0.03223	0.03092	0.02675	0.02378	0.03089	0.02247	0.02375	0.02247	0.02189	0.03631	0.0227	0.03931	0.03851	0.03646	0.03455	0.02378	0.02115	0.03084	0.02369	0.02371	0.02202	0.01849	0.02681	0.02622	0.02974	0.02715	0.0218	0.02686	0.0327	0.02503	0.02837	0.02354	0.02253	0.0223	0.02449	0.03424	0.03074	0.0207	0.02574	0.02026	0.02399	0.02214		2
Median		4	4	4	4	5	5	5	5	5	5	5	5	5	4	5	2	3	2	3	5	5	3	5	5	5	5	5	5	4	5	5	5	4	5	4	5	5	5	4	4	4	5	5	5	5	5		3
Mode		5	4	5	5	5	5	5	5	5	5	5	5	5	5	5	1	2	1	3	5	5	3	5	5	5	5	5	5	5	5	5	5	5	5	5	5	5	5	5	5	3	5	5	5	5	5		4
Std. Deviation		1.01231	1.08001	1.08737	1.05108	1.05235	1.00953	0.87332	0.77639	1.00844	0.73356	0.77552	0.73374	0.71458	1.18553	0.74103	1.28351	1.25727	1.19038	1.12819	0.77635	0.69044	1.007	0.77356	0.77421	0.71891	0.60366	0.87518	0.85593	0.971	0.88652	0.71178	0.87688	1.0676	0.81732	0.92628	0.76852	0.73561	0.72801	0.79957	1.1179	1.00363	0.67586	0.84027	0.66138	0.78325	0.72271		5
Skewness		-1.271	-0.747	-1.131	-1.11	-1.369	-1.736	-2.237	-2.147	-1.374	-2.645	-2.432	-1.927	-3.295	-1.162	-2.495	0.436	0.121	0.664	-0.105	-2.319	-2.73	-0.308	-2.186	-1.935	-1.701	-3.639	-1.7	-1.515	-1.149	-1.303	-2.301	-1.628	-0.863	-1.373	-1.056	-1.99	-2.04	-1.698	-1.064	-0.642	-0.417	-2.202	-1.116	-1.875	-1.449	-1.57		6
Std. Error of Skewness		0.075	0.075	0.075	0.075	0.075	0.075	0.075	0.075	0.075	0.075	0.075	0.075	0.075	0.075	0.075	0.075	0.075	0.075	0.075	0.075	0.075	0.075	0.075	0.075	0.075	0.075	0.075	0.075	0.075	0.075	0.075	0.075	0.075	0.075	0.075	0.075	0.075	0.075	0.075	0.075	0.075	0.075	0.075	0.075	0.075	0.075		7
Kurtosis		1.203	-0.07	0.525	0.659	1.301	2.476	5.195	5.378	1.451	8.058	6.482	4.103	12.001	0.354	6.901	-0.905	-1.088	-0.52	-0.654	6.367	8.888	-0.156	5.877	4.453	3.719	15.449	2.797	2.416	0.956	1.46	6.604	2.756	0.201	1.897	0.639	4.303	4.96	3.573	1.111	-0.362	-0.254	5.301	0.89	4.59	2.065	3.004		8
Std. Error of Kurtosis		0.15	0.15	0.15	0.15	0.15	0.15	0.15	0.15	0.15	0.15	0.15	0.15	0.15	0.15	0.15	0.15	0.15	0.15	0.15	0.15	0.15	0.15	0.15	0.15	0.15	0.15	0.15	0.15	0.15	0.15	0.15	0.15	0.15	0.15	0.15	0.15	0.15	0.15	0.15	0.15	0.15	0.15	0.15	0.15	0.15	0.15		9
Percentiles	25	4	3	4	4	4	4	4	4	4	5	4	4	5	3	5	1	2	1	2	4	5	3	4	4	4	5	4	4	4	4	4	4	3	4	4	4	4	4	4	3	3	4	4	4	4	4		10
	50	4	4	4	4	5	5	5	5	5	5	5	5	5	4	5	2	3	2	3	5	5	3	5	5	5	5	5	5	4	5	5	5	4	5	4	5	5	5	4	4	4	5	5	5	5	5		11
	75	5	5	5	5	5	5	5	5	5	5	5	5	5	5	5	3	4	3	4	5	5	4	5	5	5	5	5	5	5	5	5	5	5	5	5	5	5	5	5	5	4	5	5	5	5	5		12
																																																	13
																																																	14
																																																	15
																																																	16
																																																	17
																																																	18
	I am most afraid of coronavirus recent outbreak in Bangladesh																																																19
			Frequency	Percent	Valid Percent	Cumulative Percent																																											20
	Valid	1	31	2.9	2.9	2.9																																											21
		2	53	5	5	7.9																																											22
		3	132	12.4	12.4	20.3																																											23
		4	357	33.5	33.5	53.8																																											24
		5	493	46.2	46.2	100																																											25
		Total	1066	100	100																																												26
																																																	27
	I am afraid of getting coronavirus																																																28
			Frequency	Percent	Valid Percent	Cumulative Percent																																											29
	Valid	1	39	3.7	3.7	3.7																																											30
		2	83	7.8	7.8	11.4																																											31
		3	238	22.3	22.3	33.8																																											32
		4	357	33.5	33.5	67.3																																											33
		5	349	32.7	32.7	100																																											34
		Total	1066	100	100																																												35
																																																	36
																																																	37
	I am afraid of losing my life or my relatives' life due to this outbreak																																																38
			Frequency	Percent	Valid Percent	Cumulative Percent																																											39
	Valid	1	36	3.4	3.4	3.4																																											40
		2	75	7	7	10.4																																											41
		3	147	13.8	13.8	24.2																																											42
		4	312	29.3	29.3	53.5																																											43
		5	496	46.5	46.5	100																																											44
		Total	1066	100	100																																												45
																																																	46
	All the news and numbers of COVID-19 in different media increasing my tension
			Frequency	Percent	Valid Percent	Cumulative Percent
	Valid	1	34	3.2	3.2	3.2
		2	63	5.9	5.9	9.1
		3	160	15	15	24.1
		4	345	32.4	32.4	56.5
		5	464	43.5	43.5	100
		Total	1066	100	100
	It makes me uncomfortable to be detached from regular activities
			Frequency	Percent	Valid Percent	Cumulative Percent
	Valid	1	38	3.6	3.6	3.6
		2	49	4.6	4.6	8.2
		3	131	12.3	12.3	20.5
		4	297	27.9	27.9	48.3
		5	551	51.7	51.7	100
		Total	1066	100	100
	Health system of Bangladesh is fragile to deal with the recent outbreak of COVID-19
			Frequency	Percent	Valid Percent	Cumulative Percent
	Valid	1	34	3.2	3.2	3.2
		2	41	3.8	3.8	7
		3	93	8.7	8.7	15.8
		4	238	22.3	22.3	38.1
		5	660	61.9	61.9	100
		Total	1066	100	100
	A huge population is a pressure to the existing health system to deal with COVID-19
			Frequency	Percent	Valid Percent	Cumulative Percent
	Valid	1	25	2.3	2.3	2.3
		2	22	2.1	2.1	4.4
		3	57	5.3	5.3	9.8
		4	237	22.2	22.2	32
		5	725	68	68	100
		Total	1066	100	100
	There is a lack of awareness of basic health issues in most of the citizens of Bangladesh
			Frequency	Percent	Valid Percent	Cumulative Percent
	Valid	1	14	1.3	1.3	1.3
		2	14	1.3	1.3	2.6
		3	63	5.9	5.9	8.5
		4	257	24.1	24.1	32.6
		5	718	67.4	67.4	100
		Total	1066	100	100
	There is a lack of trained doctors and health professional to deal with the COVID-19
			Frequency	Percent	Valid Percent	Cumulative Percent
	Valid	1	31	2.9	2.9	2.9
		2	41	3.8	3.8	6.8
		3	139	13	13	19.8
		4	299	28	28	47.8
		5	556	52.2	52.2	100
		Total	1066	100	100
	There is a lack of health facilities to combat the COVID-19 outbreak in Bangladesh
			Frequency	Percent	Valid Percent	Cumulative Percent
	Valid	1	14	1.3	1.3	1.3
		2	10	0.9	0.9	2.3
		3	51	4.8	4.8	7
		4	187	17.5	17.5	24.6
		5	804	75.4	75.4	100
		Total	1066	100	100
	There is a lack of health infrastructure to deal with COVID-19
			Frequency	Percent	Valid Percent	Cumulative Percent
	Valid	1	14	1.3	1.3	1.3
		2	19	1.8	1.8	3.1
		3	52	4.9	4.9	8
		4	203	19	19	27
		5	778	73	73	100
		Total	1066	100	100
	There is a severe lack of bio-medical waste management facilities in Bangladesh
			Frequency	Percent	Valid Percent	Cumulative Percent
	Valid	1	7	0.7	0.7	0.7
		2	12	1.1	1.1	1.8
		3	78	7.3	7.3	9.1
		4	239	22.4	22.4	31.5
		5	730	68.5	68.5	100
		Total	1066	100	100
	There is a lack of COVID-19 testing facility in Bangladesh
			Frequency	Percent	Valid Percent	Cumulative Percent
	Valid	1	17	1.6	1.6	1.6
		2	10	0.9	0.9	2.5
		3	33	3.1	3.1	5.6
		4	132	12.4	12.4	18
		5	874	82	82	100
		Total	1066	100	100
	There is a lack of budget or financial support to response to this outbreak
			Frequency	Percent	Valid Percent	Cumulative Percent
	Valid	1	57	5.3	5.3	5.3
		2	84	7.9	7.9	13.2
		3	127	11.9	11.9	25.1
		4	274	25.7	25.7	50.8
		5	524	49.2	49.2	100
		Total	1066	100	100
	Most of the poor people will not have access to existing health facilities if they are infected by COVID-19
			Frequency	Percent	Valid Percent	Cumulative Percent
	Valid	1	12	1.1	1.1	1.1
		2	11	1	1	2.2
		3	65	6.1	6.1	8.3
		4	170	15.9	15.9	24.2
		5	808	75.8	75.8	100
		Total	1066	100	100
	Bangladesh government can deal with this outbreak
			Frequency	Percent	Valid Percent	Cumulative Percent
	Valid	1	299	28	28	28
		2	279	26.2	26.2	54.2
		3	233	21.9	21.9	76.1
		4	160	15	15	91.1
		5	95	8.9	8.9	100
		Total	1066	100	100
	Government is taking this outbreak seriously to deal with
			Frequency	Percent	Valid Percent	Cumulative Percent
	Valid	1	212	19.9	19.9	19.9
		2	269	25.2	25.2	45.1
		3	240	22.5	22.5	67.6
		4	251	23.5	23.5	91.2
		5	94	8.8	8.8	100
		Total	1066	100	100
	Government is taking proper decisions in the right time
			Frequency	Percent	Valid Percent	Cumulative Percent
	Valid	1	347	32.6	32.6	32.6
		2	327	30.7	30.7	63.2
		3	204	19.1	19.1	82.4
		4	131	12.3	12.3	94.7
		5	57	5.3	5.3	100
		Total	1066	100	100
	Government is involving other sector actors to combat the COVID-19 outbreak
			Frequency	Percent	Valid Percent	Cumulative Percent
	Valid	1	131	12.3	12.3	12.3
		2	202	18.9	18.9	31.2
		3	385	36.1	36.1	67.4
		4	254	23.8	23.8	91.2
		5	94	8.8	8.8	100
		Total	1066	100	100
	Government need support from the people to reduce the impact of COVID-19
			Frequency	Percent	Valid Percent	Cumulative Percent
	Valid	1	17	1.6	1.6	1.6
		2	11	1	1	2.6
		3	55	5.2	5.2	7.8
		4	252	23.6	23.6	31.4
		5	731	68.6	68.6	100
		Total	1066	100	100
	Government need to formulate a policy and action plan and implement it immediately
			Frequency	Percent	Valid Percent	Cumulative Percent
	Valid	1	11	1	1	1
		2	9	0.8	0.8	1.9
		3	44	4.1	4.1	6
		4	187	17.5	17.5	23.5
		5	815	76.5	76.5	100
		Total	1066	100	100
	The developed nations are going to support Bangladesh in response to COVID-19
			Frequency	Percent	Valid Percent	Cumulative Percent
	Valid	1	45	4.2	4.2	4.2
		2	104	9.8	9.8	14
		3	411	38.6	38.6	52.5
		4	337	31.6	31.6	84.1
		5	169	15.9	15.9	100
		Total	1066	100	100
	Shut down or lockdown of regular activities is a good decision to reduce the chance of infection of COVID-19
			Frequency	Percent	Valid Percent	Cumulative Percent
	Valid	1	16	1.5	1.5	1.5
		2	13	1.2	1.2	2.7
		3	51	4.8	4.8	7.5
		4	292	27.4	27.4	34.9
		5	694	65.1	65.1	100
		Total	1066	100	100
	Shut down or lockdown or social distancing will have an economic and social impact in future
			Frequency	Percent	Valid Percent	Cumulative Percent
	Valid	1	12	1.1	1.1	1.1
		2	15	1.4	1.4	2.5
		3	69	6.5	6.5	9
		4	290	27.2	27.2	36.2
		5	680	63.8	63.8	100
		Total	1066	100	100
	The formal and informal business will be hampered
			Frequency	Percent	Valid Percent	Cumulative Percent
	Valid	1	7	0.7	0.7	0.7
		2	11	1	1	1.7
		3	67	6.3	6.3	8
		4	329	30.9	30.9	38.8
		5	652	61.2	61.2	100
		Total	1066	100	100
	Poor people living in hand to mouth will be severely affected
			Frequency	Percent	Valid Percent	Cumulative Percent
	Valid	1	9	0.8	0.8	0.8
		2	6	0.6	0.6	1.4
		3	33	3.1	3.1	4.5
		4	106	9.9	9.9	14.4
		5	912	85.6	85.6	100
		Total	1066	100	100
	Most of the poor people living in urban areas have to leave due to not having any options for income
			Frequency	Percent	Valid Percent	Cumulative Percent
	Valid	1	15	1.4	1.4	1.4
		2	32	3	3	4.4
		3	92	8.6	8.6	13
		4	278	26.1	26.1	39.1
		5	649	60.9	60.9	100
		Total	1066	100	100
	Many people will lose their livelihood/ jobs at a time
			Frequency	Percent	Valid Percent	Cumulative Percent
	Valid	1	14	1.3	1.3	1.3
		2	27	2.5	2.5	3.8
		3	102	9.6	9.6	13.4
		4	339	31.8	31.8	45.2
		5	584	54.8	54.8	100
		Total	1066	100	100
	There will be less supply of basic goods/ products for daily use
			Frequency	Percent	Valid Percent	Cumulative Percent
	Valid	1	21	2	2	2
		2	60	5.6	5.6	7.6
		3	136	12.8	12.8	20.4
		4	392	36.8	36.8	57.1
		5	457	42.9	42.9	100
		Total	1066	100	100
	Price of most of the basic products will be higher than usual
			Frequency	Percent	Valid Percent	Cumulative Percent
	Valid	1	11	1	1	1
		2	43	4	4	5.1
		3	114	10.7	10.7	15.8
		4	357	33.5	33.5	49.2
		5	541	50.8	50.8	100
		Total	1066	100	100
	Poor people will suffer food and nutritional deficiency
			Frequency	Percent	Valid Percent	Cumulative Percent
	Valid	1	10	0.9	0.9	0.9
		2	13	1.2	1.2	2.2
		3	43	4	4	6.2
		4	260	24.4	24.4	30.6
		5	740	69.4	69.4	100
		Total	1066	100	100
	The formal education system will be hampered
			Frequency	Percent	Valid Percent	Cumulative Percent
	Valid	1	18	1.7	1.7	1.7
		2	25	2.3	2.3	4
		3	101	9.5	9.5	13.5
		4	313	29.4	29.4	42.9
		5	609	57.1	57.1	100
		Total	1066	100	100
	There is a chance of social conflict due to this outbreak
			Frequency	Percent	Valid Percent	Cumulative Percent
	Valid	1	40	3.8	3.8	3.8
		2	68	6.4	6.4	10.1
		3	220	20.6	20.6	30.8
		4	366	34.3	34.3	65.1
		5	372	34.9	34.9	100
		Total	1066	100	100
	There is a chance of community transmission of COVID-19 in Bangladesh
			Frequency	Percent	Valid Percent	Cumulative Percent
	Valid	1	10	0.9	0.9	0.9
		2	13	1.2	1.2	2.2
		3	130	12.2	12.2	14.4
		4	312	29.3	29.3	43.6
		5	601	56.4	56.4	100
		Total	1066	100	100
	A huge number of people will be infected
			Frequency	Percent	Valid Percent	Cumulative Percent
	Valid	1	13	1.2	1.2	1.2
		2	37	3.5	3.5	4.7
		3	180	16.9	16.9	21.6
		4	321	30.1	30.1	51.7
		5	515	48.3	48.3	100
		Total	1066	100	100
	There is a chance of not detecting most of the infected patients due to lack of health facilities leads to undermining the actual infected case
			Frequency	Percent	Valid Percent	Cumulative Percent
	Valid	1	10	0.9	0.9	0.9
		2	13	1.2	1.2	2.2
		3	84	7.9	7.9	10
		4	225	21.1	21.1	31.1
		5	734	68.9	68.9	100
		Total	1066	100	100
	There is a chance to increase in the number of death for not having proper health facilities
			Frequency	Percent	Valid Percent	Cumulative Percent
	Valid	1	9	0.8	0.8	0.8
		2	14	1.3	1.3	2.2
		3	61	5.7	5.7	7.9
		4	266	25	25	32.8
		5	716	67.2	67.2	100
		Total	1066	100	100
	Lack of bio-medical waste management facilities in Bangladesh will create more problem
			Frequency	Percent	Valid Percent	Cumulative Percent
	Valid	1	7	0.7	0.7	0.7
		2	12	1.1	1.1	1.8
		3	71	6.7	6.7	8.4
		4	320	30	30	38.5
		5	656	61.5	61.5	100
		Total	1066	100	100
	There will be many people with psychosocially shocked due to this outbreak
			Frequency	Percent	Valid Percent	Cumulative Percent
	Valid	1	6	0.6	0.6	0.6
		2	22	2.1	2.1	2.6
		3	130	12.2	12.2	14.8
		4	413	38.7	38.7	53.6
		5	495	46.4	46.4	100
		Total	1066	100	100
	The government will lose its trust to the people
			Frequency	Percent	Valid Percent	Cumulative Percent
	Valid	1	41	3.8	3.8	3.8
		2	79	7.4	7.4	11.3
		3	289	27.1	27.1	38.4
		4	269	25.2	25.2	63.6
		5	388	36.4	36.4	100
		Total	1066	100	100
	There is a chance of disaster like flood, cyclone, drought etc. in 2020 considering the climate change vulnerability of Bangladesh
			Frequency	Percent	Valid Percent	Cumulative Percent
	Valid	1	28	2.6	2.6	2.6
		2	76	7.1	7.1	9.8
		3	350	32.8	32.8	42.6
		4	348	32.6	32.6	75.2
		5	264	24.8	24.8	100
		Total	1066	100	100
	If any disaster (flood, cyclone etc.) occur after the COVID-19 situation then it will create a double burden to the country
			Frequency	Percent	Valid Percent	Cumulative Percent
	Valid	1	4	0.4	0.4	0.4
		2	13	1.2	1.2	1.6
		3	59	5.5	5.5	7.1
		4	200	18.8	18.8	25.9
		5	790	74.1	74.1	100
		Total	1066	100	100
	There is a chance of severe food scarcity due to these events (COVID-19 + Disasters) in the country
			Frequency	Percent	Valid Percent	Cumulative Percent
	Valid	1	6	0.6	0.6	0.6
		2	29	2.7	2.7	3.3
		3	141	13.2	13.2	16.5
		4	353	33.1	33.1	49.6
		5	537	50.4	50.4	100
		Total	1066	100	100
	High possibility of huge economical loss
			Frequency	Percent	Valid Percent	Cumulative Percent
	Valid	1	5	0.5	0.5	0.5
		2	7	0.7	0.7	1.1
		3	53	5	5	6.1
		4	290	27.2	27.2	33.3
		5	711	66.7	66.7	100
		Total	1066	100	100
	High possibility of increasing the poverty level
			Frequency	Percent	Valid Percent	Cumulative Percent
	Valid	1	5	0.5	0.5	0.5
		2	25	2.3	2.3	2.8
		3	91	8.5	8.5	11.4
		4	330	31	31	42.3
		5	615	57.7	57.7	100
		Total	1066	100	100
	High possibility of severe socio-economic and health crisis
			Frequency	Percent	Valid Percent	Cumulative Percent
	Valid	1	5	0.5	0.5	0.5
		2	16	1.5	1.5	2
		3	67	6.3	6.3	8.3
		4	347	32.6	32.6	40.8
		5	631	59.2	59.2	100
		Total	1066	100	100
[truncated: 5 more columns]

## Sheet: Table-S2_CTT
	Reliability Statistics
	Cronbach's Alpha	Cronbach's Alpha Based on Standardized Items	N of Items		Item Statistics
	0.896	0.914	46			Mean	Std. Deviation	N		Summary Item Statistics
					I am most afraid of coronavirus recent outbreak in Bangladesh	4.152	1.01231	1066			Mean	Minimum	Maximum	Range	Maximum / Minimum	Variance	N of Items		Scale Statistics
					I am afraid of getting coronavirus	3.8386	1.08001	1066		Item Means	4.204	2.272	4.788	2.516	2.107	0.328	46		Mean	Variance	Std. Deviation	N of Items
					I am afraid of losing my life or my relatives' life due to this outbreak	4.0854	1.08737	1066		Item Variances	0.819	0.364	1.647	1.283	4.521	0.108	46		193.363	306.055	17.4944	46
					All the news and numbers of COVID-19 in different media increasing my tension	4.0713	1.05108	1066		Inter-Item Covariances	0.13	-0.434	0.906	1.34	-2.087	0.014	46
					It makes me uncomfortable to be detached from regular activities	4.1951	1.05235	1066		Inter-Item Correlations	0.189	-0.309	0.667	0.976	-2.16	0.023	46
					Health system of Bangladesh is fragile to deal with the recent outbreak of COVID-19	4.3593	1.00953	1066
					A huge population is a pressure to the existing health system to deal with COVID-19	4.515	0.87332	1066
					There is a lack of awareness of basic health issues in most of the citizens of Bangladesh	4.5488	0.77639	1066
					There is a lack of trained doctors and health professional to deal with the COVID-19	4.227	1.00844	1066											ANOVA with Tukey's Test for Nonadditivity
					There is a lack of health facilities to combat the COVID-19 outbreak in Bangladesh	4.6482	0.73356	1066		Item-Total Statistics												Sum of Squares	df	Mean Square	F	Sig
					There is a lack of health infrastructure to deal with COVID-19	4.606	0.77552	1066			Scale Mean if Item Deleted	Scale Variance if Item Deleted	Corrected Item-Total Correlation	Squared Multiple Correlation	Cronbach's Alpha if Item Deleted				Between People			7085.84	1065	6.653
					There is a severe lack of bio-medical waste management facilities in Bangladesh	4.5694	0.73374	1066		I am most afraid of coronavirus recent outbreak in Bangladesh	189.211	291.842	0.381	.	0.894				Within People	Between Items		15746.3	45	349.918	507.45	0
					There is a lack of COVID-19 testing facility in Bangladesh	4.7223	0.71458	1066		I am afraid of getting coronavirus	189.524	291.788	0.355	.	0.895					Residual	Nonadditivity	358.809a	1	358.809	526.044	0
					There is a lack of budget or financial support to response to this outbreak	4.0544	1.18553	1066		I am afraid of losing my life or my relatives' life due to this outbreak	189.278	291.493	0.36	.	0.895						Balance	32688.4	47924	0.682
					Most of the poor people will not have access to existing health facilities if they are infected by COVID-19	4.6426	0.74103	1066		All the news and numbers of COVID-19 in different media increasing my tension	189.292	291.469	0.376	.	0.894						Total	33047.3	47925	0.69
					Bangladesh government can deal with this outbreak	2.5056	1.28351	1066		It makes me uncomfortable to be detached from regular activities	189.168	292.561	0.344	.	0.895					Total		48793.6	47970	1.017
					Government is taking this outbreak seriously to deal with	2.7617	1.25727	1066		Health system of Bangladesh is fragile to deal with the recent outbreak of COVID-19	189.004	292.59	0.36	.	0.895				Total			55879.4	49035	1.14
					Government is taking proper decisions in the right time	2.272	1.19038	1066		A huge population is a pressure to the existing health system to deal with COVID-19	188.848	292.7	0.421	.	0.894				Grand Mean = 4.2035
					Government is involving other sector actors to combat the COVID-19 outbreak	2.9794	1.12819	1066		There is a lack of awareness of basic health issues in most of the citizens of Bangladesh	188.814	293.321	0.456	.	0.893				a Tukey's estimate of power to which observations must be raised to achieve additivity = -.669.
					Government need support from the people to reduce the impact of COVID-19	4.5657	0.77635	1066		There is a lack of trained doctors and health professional to deal with the COVID-19	189.136	294.471	0.305	.	0.895
					Government need to formulate a policy and action plan and implement it immediately	4.6754	0.69044	1066		There is a lack of health facilities to combat the COVID-19 outbreak in Bangladesh	188.715	292.05	0.537	.	0.893
					The developed nations are going to support Bangladesh in response to COVID-19	3.4512	1.007	1066		There is a lack of health infrastructure to deal with COVID-19	188.757	291.91	0.511	.	0.893
					Shut down or lockdown of regular activities is a good decision to reduce the chance of infection of COVID-19	4.5338	0.77356	1066		There is a severe lack of bio-medical waste management facilities in Bangladesh	188.794	292.147	0.533	.	0.893				Hotelling's T-Squared Test
					Shut down or lockdown or social distancing will have an economic and social impact in future	4.5113	0.77421	1066		There is a lack of COVID-19 testing facility in Bangladesh	188.641	293.126	0.508	.	0.893				Hotelling's T-Squared	F	df1	df2	Sig
					The formal and informal business will be hampered	4.5084	0.71891	1066		There is a lack of budget or financial support to response to this outbreak	189.309	292.131	0.309	.	0.896				7515.16	160.104	45	1021	0
					Poor people living in hand to mouth will be severely affected	4.788	0.60366	1066		Most of the poor people will not have access to existing health facilities if they are infected by COVID-19	188.72	291.499	0.554	.	0.892
					Most of the poor people living in urban areas have to leave due to not having any options for income	4.4203	0.87518	1066		Bangladesh government can deal with this outbreak	190.857	306.836	-0.054	.	0.903
					Many people will lose their livelihood/ jobs at a time	4.3621	0.85593	1066		Government is taking this outbreak seriously to deal with	190.601	304.948	-0.011	.	0.902
					There will be less supply of basic goods/ products for daily use	4.1295	0.971	1066		Government is taking proper decisions in the right time	191.091	307.882	-0.078	.	0.902
					Price of most of the basic products will be higher than usual	4.2889	0.88652	1066		Government is involving other sector actors to combat the COVID-19 outbreak	190.384	303.204	0.04	.	0.9
					Poor people will suffer food and nutritional deficiency	4.6013	0.71178	1066		Government need support from the people to reduce the impact of COVID-19	188.797	293.871	0.435	.	0.894				Intraclass Correlation Coefficient
					The formal education system will be hampered	4.379	0.87688	1066		Government need to formulate a policy and action plan and implement it immediately	188.688	293.779	0.499	.	0.893					Intraclass Correlationb	95% Confidence Interval		F Test with True Value 0
					There is a chance of social conflict due to this outbreak	3.9024	1.0676	1066		The developed nations are going to support Bangladesh in response to COVID-19	189.912	296.135	0.257	.	0.896						Lower Bound	Upper Bound	Value	df1	df2	Sig
					There is a chance of community transmission of COVID-19 in Bangladesh	4.3893	0.81732	1066		Shut down or lockdown of regular activities is a good decision to reduce the chance of infection of COVID-19	188.829	296.363	0.341	.	0.895				Single Measures	.158a	0.146	0.172	9.649	1065	47925	0
					A huge number of people will be infected	4.2083	0.92628	1066		Shut down or lockdown or social distancing will have an economic and social impact in future	188.852	292.59	0.486	.	0.893				Average Measures	.896c	0.887	0.905	9.649	1065	47925	0
					There is a chance of not detecting most of the infected patients due to lack of health facilities leads to undermining the actual infected case	4.5572	0.76852	1066		The formal and informal business will be hampered	188.855	292.906	0.513	.	0.893				Two-way mixed effects model where people effects are random and measures effects are fixed.
					There is a chance to increase in the number of death for not having proper health facilities	4.5629	0.73561	1066		Poor people living in hand to mouth will be severely affected	188.575	294.812	0.525	.	0.893				a The estimator is the same, whether the interaction effect is present or not.
					Lack of bio-medical waste management facilities in Bangladesh will create more problem	4.5066	0.72801	1066		Most of the poor people living in urban areas have to leave due to not having any options for income	188.943	292.422	0.43	.	0.894				b Type C intraclass correlation coefficients using a consistency definition. The between-measure variance is excluded from the denominator variance.
					There will be many people with psychosocially shocked due to this outbreak	4.2842	0.79957	1066		Many people will lose their livelihood/ jobs at a time	189.001	291.002	0.49	.	0.893				c This estimate is computed assuming the interaction effect is absent, because it is not estimable otherwise.
					The government will lose its trust to the people	3.8293	1.1179	1066		There will be less supply of basic goods/ products for daily use	189.234	291.451	0.412	.	0.894
					There is a chance of disaster like flood, cyclone, drought etc. in 2020 considering the climate change vulnerability of Bangladesh	3.6979	1.00363	1066		Price of most of the basic products will be higher than usual	189.074	293.088	0.401	.	0.894
					If any disaster (flood, cyclone etc.) occur after the COVID-19 situation then it will create a double burden to the country	4.6501	0.67586	1066		Poor people will suffer food and nutritional deficiency	188.762	292.619	0.531	.	0.893
					There is a chance of severe food scarcity due to these events (COVID-19 + Disasters) in the country	4.3002	0.84027	1066		The formal education system will be hampered	188.984	291.871	0.448	.	0.893
					High possibility of huge economical loss	4.5901	0.66138	1066		There is a chance of social conflict due to this outbreak	189.461	290.063	0.408	.	0.894
					High possibility of increasing the poverty level	4.4306	0.78325	1066		There is a chance of community transmission of COVID-19 in Bangladesh	188.974	292.551	0.459	.	0.893
					High possibility of severe socio-economic and health crisis	4.485	0.72271	1066		A huge number of people will be infected	189.155	290.484	0.466	.	0.893
										There is a chance of not detecting most of the infected patients due to lack of health facilities leads to undermining the actual infected case	188.806	292.108	0.508	.	0.893
										There is a chance to increase in the number of death for not having proper health facilities	188.8	290.614	0.594	.	0.892
										Lack of bio-medical waste management facilities in Bangladesh will create more problem	188.857	291.032	0.583	.	0.892
										There will be many people with psychosocially shocked due to this outbreak	189.079	291.81	0.498	.	0.893
										The government will lose its trust to the people	189.534	291.772	0.341	.	0.895
										There is a chance of disaster like flood, cyclone, drought etc. in 2020 considering the climate change vulnerability of Bangladesh	189.665	293.744	0.329	.	0.895
										If any disaster (flood, cyclone etc.) occur after the COVID-19 situation then it will create a double burden to the country	188.713	293.018	0.544	.	0.893
										There is a chance of severe food scarcity due to these events (COVID-19 + Disasters) in the country	189.063	292.166	0.459	.	0.893
										High possibility of huge economical loss	188.773	293.043	0.555	.	0.893
										High possibility of increasing the poverty level	188.933	290.117	0.574	.	0.892
										High possibility of severe socio-economic and health crisis	188.878	290.702	0.602	.	0.892

## Sheet: Table-S3_Pearson
Correlations
	MH1	MH2	MH3	MH4	MH5	HSB1	HSB2	HSB3	HSB4	HSB5	HSB6	HSB7	HSB8	HSB9	HSB10	GPI1	GPI2	GPI3	GPI4	GPI5	GPI6	GPI7	SEI1	SEI2	SEI3	SEI4	SEI5	SEI6	SEI7	SEI8	SEI9	SEI10	SEI11	IEI1	IEI2	IEI3	IEI4	IEI5	IEI6	IEI7	EEI1	EEI2	EEI3	EEI4	EEI5	EEI6
MH1	1	.584**	.511**	.429**	.238**	.218**	.182**	.202**	.132**	.214**	.206**	.198**	.197**	.104**	.178**	-.071*	-.112**	-.114**	-0.056	.138**	.177**	.146**	.165**	.109**	.104**	.150**	.069*	.113**	0.048	0.058	.082**	0.046	.142**	.315**	.366**	.263**	.301**	.266**	.202**	.158**	.149**	.194**	.141**	.149**	.136**	.157**
MH2	.584**	1	.654**	.391**	.243**	.132**	.128**	.165**	0.058	.170**	.164**	.118**	.130**	.120**	.175**	-0.054	-.094**	-.096**	-0.042	.076*	.115**	.123**	.178**	.075*	.078*	.179**	.070*	.131**	.093**	.083**	.107**	.084**	.116**	.240**	.319**	.215**	.256**	.262**	.177**	.135**	.172**	.141**	.146**	.164**	.167**	.162**
MH3	.511**	.654**	1	.341**	.211**	.161**	.132**	.166**	.071*	.171**	.176**	.181**	.149**	.107**	.194**	-0.052	-.140**	-.143**	-0.046	.118**	.156**	.117**	.163**	.113**	.080**	.105**	.097**	.149**	.127**	.079*	.127**	.084**	.154**	.198**	.330**	.208**	.267**	.258**	.164**	.178**	.185**	.184**	.172**	.178**	.186**	.162**
MH4	.429**	.391**	.341**	1	.344**	.191**	.222**	.220**	.093**	.182**	.175**	.152**	.124**	.137**	.188**	-0.043	-0.002	-0.038	0.005	.150**	.166**	.099**	.110**	.110**	.161**	.151**	.127**	.118**	.132**	.143**	.128**	.106**	.157**	.180**	.219**	.183**	.196**	.257**	.229**	.173**	.152**	.161**	.153**	.179**	.186**	.165**
MH5	.238**	.243**	.211**	.344**	1	.155**	.155**	.189**	.095**	.186**	.192**	.184**	.150**	.110**	.211**	0.017	.064*	0.021	.067*	.167**	.173**	.126**	.080**	.183**	.218**	.185**	.151**	.133**	.105**	.094**	.180**	.182**	.155**	.106**	.098**	.127**	.185**	.209**	.181**	.101**	.102**	.161**	.111**	.180**	.200**	.146**
HSB1	.218**	.132**	.161**	.191**	.155**	1	.277**	.255**	.205**	.388**	.305**	.337**	.274**	.116**	.253**	-.085**	-.128**	-.185**	-.083**	.171**	.225**	0.02	.144**	.162**	.174**	.168**	.104**	.150**	.113**	.146**	.138**	.112**	.160**	.268**	.186**	.286**	.295**	.261**	.170**	.205**	.135**	.219**	.161**	.236**	.225**	.244**
HSB2	.182**	.128**	.132**	.222**	.155**	.277**	1	.326**	.227**	.320**	.294**	.323**	.278**	.188**	.250**	-.087**	0.021	-0.055	0.045	.271**	.234**	.074*	.238**	.216**	.241**	.222**	.154**	.186**	.155**	.185**	.174**	.154**	.130**	.192**	.180**	.237**	.240**	.257**	.238**	.113**	.174**	.283**	.227**	.250**	.211**	.270**
HSB3	.202**	.165**	.166**	.220**	.189**	.255**	.326**	1	.295**	.392**	.356**	.382**	.348**	.239**	.345**	-.092**	-.113**	-.125**	-.086**	.224**	.257**	.079**	.189**	.194**	.235**	.283**	.234**	.201**	.217**	.196**	.250**	.152**	.151**	.228**	.281**	.321**	.292**	.303**	.220**	.190**	.153**	.257**	.222**	.239**	.226**	.257**
HSB4	.132**	0.058	.071*	.093**	.095**	.205**	.227**	.295**	1	.395**	.395**	.363**	.326**	.261**	.257**	-.114**	-0.007	-.069*	-0.051	.166**	.133**	.092**	.068*	.101**	.100**	.121**	.131**	.081**	.120**	.101**	.109**	.127**	.109**	.136**	.109**	.196**	.198**	.200**	.093**	.096**	.118**	.201**	.130**	.169**	.127**	.193**
HSB5	.214**	.170**	.171**	.182**	.186**	.388**	.320**	.392**	.395**	1	.644**	.585**	.598**	.277**	.458**	-.100**	-.107**	-.138**	-0.025	.234**	.338**	.094**	.237**	.241**	.242**	.266**	.141**	.182**	.164**	.203**	.274**	.171**	.164**	.266**	.272**	.400**	.428**	.346**	.260**	.220**	.108**	.327**	.203**	.268**	.264**	.317**
HSB6	.206**	.164**	.176**	.175**	.192**	.305**	.294**	.356**	.395**	.644**	1	.551**	.536**	.325**	.454**	-.104**	-.084**	-.133**	-0.053	.264**	.305**	.088**	.146**	.184**	.240**	.209**	.136**	.190**	.154**	.163**	.217**	.156**	.194**	.267**	.292**	.342**	.366**	.346**	.225**	.227**	.140**	.315**	.248**	.271**	.276**	.291**
HSB7	.198**	.118**	.181**	.152**	.184**	.337**	.323**	.382**	.363**	.585**	.551**	1	.565**	.274**	.435**	-.105**	-.093**	-.126**	-0.049	.270**	.321**	.070*	.210**	.231**	.293**	.254**	.213**	.219**	.143**	.204**	.279**	.217**	.185**	.327**	.216**	.381**	.368**	.405**	.263**	.217**	.165**	.323**	.246**	.280**	.269**	.336**
HSB8	.197**	.130**	.149**	.124**	.150**	.274**	.278**	.348**	.326**	.598**	.536**	.565**	1	.279**	.468**	-.063*	-.065*	-.140**	0.017	.312**	.375**	.086**	.194**	.220**	.239**	.264**	.224**	.198**	.141**	.219**	.301**	.162**	.158**	.240**	.232**	.354**	.417**	.345**	.240**	.212**	.109**	.275**	.197**	.234**	.234**	.297**
HSB9	.104**	.120**	.107**	.137**	.110**	.116**	.188**	.239**	.261**	.277**	.325**	.274**	.279**	1	.286**	-.199**	-0.022	-.063*	-0.005	.061*	.121**	.078*	0.015	.106**	.125**	.158**	.150**	.158**	.214**	.150**	.175**	.146**	.213**	.111**	.154**	.122**	.153**	.175**	.101**	.169**	.132**	.155**	.208**	.202**	.184**	.181**
HSB10	.178**	.175**	.194**	.188**	.211**	.253**	.250**	.345**	.257**	.458**	.454**	.435**	.468**	.286**	1	-.091**	-.112**	-.136**	-.071*	.331**	.434**	.145**	.210**	.240**	.250**	.334**	.265**	.289**	.248**	.242**	.362**	.191**	.225**	.287**	.300**	.386**	.443**	.386**	.276**	.250**	.161**	.303**	.264**	.331**	.340**	.336**
GPI1	-.071*	-0.054	-0.052	-0.043	0.017	-.085**	-.087**	-.092**	-.114**	-.100**	-.104**	-.105**	-.063*	-.199**	-.091**	1	.367**	.344**	.242**	0.047	0.016	.159**	0.057	.063*	-.065*	-0.037	0.005	-0.053	-0.041	-.096**	-.061*	-0.021	-0.013	-.079*	-.118**	-.147**	-.114**	-.076*	-0.021	-.113**	-0.045	-.090**	-.072*	-.087**	-.081**	-.113**
GPI2	-.112**	-.094**	-.140**	-0.002	.064*	-.128**	0.021	-.113**	-0.007	-.107**	-.084**	-.093**	-.065*	-0.022	-.112**	.367**	1	.605**	.497**	.189**	0.019	.168**	.077*	.084**	0.03	-0.006	0.012	-.084**	-0.045	-.086**	-0.049	.078*	-.084**	-.116**	-.194**	-.160**	-.150**	-.108**	-0.024	-.309**	-.066*	-.098**	-.068*	-.063*	-.082**	-.075*
GPI3	-.114**	-.096**	-.143**	-0.038	0.021	-.185**	-0.055	-.125**	-.069*	-.138**	-.133**	-.126**	-.140**	-.063*	-.136**	.344**	.605**	1	.471**	.066*	-.098**	.152**	0.037	0.037	-0.048	-.096**	-0.019	-.088**	-.069*	-.141**	-.103**	0.01	-0.056	-.149**	-.177**	-.263**	-.185**	-.121**	-0.039	-.274**	-0.033	-.131**	-0.056	-.088**	-.075*	-.124**
GPI4	-0.056	-0.042	-0.046	0.005	.067*	-.083**	0.045	-.086**	-0.051	-0.025	-0.053	-0.049	0.017	-0.005	-.071*	.242**	.497**	.471**	1	.164**	0.026	.144**	0.054	.063*	0.001	-0.005	0.018	-0.04	-0.034	-0.056	-0.034	0.05	-0.045	-.071*	-.077*	-.132**	-.071*	-.068*	0.016	-.183**	-0.032	-0.034	0.011	-0.038	-0.032	-.064*
GPI5	.138**	.076*	.118**	.150**	.167**	.171**	.271**	.224**	.166**	.234**	.264**	.270**	.312**	.061*	.331**	0.047	.189**	.066*	.164**	1	.541**	.146**	.296**	.287**	.319**	.310**	.146**	.131**	.072*	.114**	.278**	.202**	.066*	.227**	.191**	.282**	.338**	.310**	.247**	0.036	0.048	.270**	.122**	.231**	.189**	.245**
GPI6	.177**	.115**	.156**	.166**	.173**	.225**	.234**	.257**	.133**	.338**	.305**	.321**	.375**	.121**	.434**	0.016	0.019	-.098**	0.026	.541**	1	.181**	.295**	.263**	.303**	.362**	.221**	.220**	.150**	.210**	.342**	.220**	.138**	.244**	.257**	.369**	.425**	.370**	.305**	.204**	.081**	.322**	.155**	.222**	.266**	.295**
GPI7	.146**	.123**	.117**	.099**	.126**	0.02	.074*	.079**	.092**	.094**	.088**	.070*	.086**	.078*	.145**	.159**	.168**	.152**	.144**	.146**	.181**	1	.140**	.084**	0.059	.100**	.118**	.122**	.077*	-0.002	.106**	.129**	.113**	.108**	.162**	0.041	.125**	.109**	.183**	.062*	.148**	.118**	.099**	.099**	.132**	.121**
SEI1	.165**	.178**	.163**	.110**	.080**	.144**	.238**	.189**	.068*	.237**	.146**	.210**	.194**	0.015	.210**	0.057	.077*	0.037	0.054	.296**	.295**	.140**	1	.231**	.243**	.261**	.163**	.174**	0.049	.121**	.225**	.176**	0.034	.186**	.159**	.182**	.237**	.206**	.213**	0.051	.082**	.176**	.087**	.164**	.177**	.207**
SEI2	.109**	.075*	.113**	.110**	.183**	.162**	.216**	.194**	.101**	.241**	.184**	.231**	.220**	.106**	.240**	.063*	.084**	0.037	.063*	.287**	.263**	.084**	.231**	1	.636**	.419**	.284**	.344**	.247**	.288**	.369**	.355**	.267**	.227**	.163**	.255**	.248**	.243**	.205**	.156**	.140**	.315**	.204**	.380**	.344**	.389**
SEI3	.104**	.078*	.080**	.161**	.218**	.174**	.241**	.235**	.100**	.242**	.240**	.293**	.239**	.125**	.250**	-.065*	0.03	-0.048	0.001	.319**	.303**	0.059	.243**	.636**	1	.487**	.345**	.412**	.249**	.298**	.420**	.399**	.274**	.224**	.193**	.279**	.288**	.291**	.250**	.163**	.141**	.343**	.235**	.447**	.406**	.421**
SEI4	.150**	.179**	.105**	.151**	.185**	.168**	.222**	.283**	.121**	.266**	.209**	.254**	.264**	.158**	.334**	-0.037	-0.006	-.096**	-0.005	.310**	.362**	.100**	.261**	.419**	.487**	1	.405**	.432**	.270**	.320**	.540**	.331**	.221**	.234**	.234**	.316**	.318**	.302**	.271**	.159**	.117**	.363**	.211**	.379**	.386**	.363**
SEI5	.069*	.070*	.097**	.127**	.151**	.104**	.154**	.234**	.131**	.141**	.136**	.213**	.224**	.150**	.265**	0.005	0.012	-0.019	0.018	.146**	.221**	.118**	.163**	.284**	.345**	.405**	1	.479**	.327**	.294**	.375**	.289**	.291**	.129**	.153**	.195**	.207**	.262**	.236**	.169**	.138**	.238**	.229**	.319**	.345**	.279**
SEI6	.113**	.131**	.149**	.118**	.133**	.150**	.186**	.201**	.081**	.182**	.190**	.219**	.198**	.158**	.289**	-0.053	-.084**	-.088**	-0.04	.131**	.220**	.122**	.174**	.344**	.412**	.432**	.479**	1	.424**	.363**	.459**	.300**	.373**	.264**	.236**	.270**	.295**	.248**	.268**	.249**	.219**	.276**	.256**	.350**	.421**	.387**
SEI7	0.048	.093**	.127**	.132**	.105**	.113**	.155**	.217**	.120**	.164**	.154**	.143**	.141**	.214**	.248**	-0.041	-0.045	-.069*	-0.034	.072*	.150**	.077*	0.049	.247**	.249**	.270**	.327**	.424**	1	.504**	.420**	.287**	.364**	.139**	.182**	.180**	.198**	.178**	.246**	.223**	.192**	.229**	.351**	.274**	.330**	.332**
SEI8	0.058	.083**	.079*	.143**	.094**	.146**	.185**	.196**	.101**	.203**	.163**	.204**	.219**	.150**	.242**	-.096**	-.086**	-.141**	-0.056	.114**	.210**	-0.002	.121**	.288**	.298**	.320**	.294**	.363**	.504**	1	.440**	.268**	.316**	.145**	.169**	.238**	.217**	.204**	.246**	.247**	.128**	.241**	.286**	.269**	.314**	.353**
SEI9	.082**	.107**	.127**	.128**	.180**	.138**	.174**	.250**	.109**	.274**	.217**	.279**	.301**	.175**	.362**	-.061*	-0.049	-.103**	-0.034	.278**	.342**	.106**	.225**	.369**	.420**	.540**	.375**	.459**	.420**	.440**	1	.402**	.298**	.204**	.210**	.310**	.320**	.298**	.308**	.196**	.162**	.385**	.288**	.349**	.411**	.404**
SEI10	0.046	.084**	.084**	.106**	.182**	.112**	.154**	.152**	.127**	.171**	.156**	.217**	.162**	.146**	.191**	-0.021	.078*	0.01	0.05	.202**	.220**	.129**	.176**	.355**	.399**	.331**	.289**	.300**	.287**	.268**	.402**	1	.367**	.175**	.178**	.205**	.253**	.280**	.285**	.130**	.192**	.306**	.261**	.344**	.339**	.366**
SEI11	.142**	.116**	.154**	.157**	.155**	.160**	.130**	.151**	.109**	.164**	.194**	.185**	.158**	.213**	.225**	-0.013	-.084**	-0.056	-0.045	.066*	.138**	.113**	0.034	.267**	.274**	.221**	.291**	.373**	.364**	.316**	.298**	.367**	1	.233**	.182**	.145**	.181**	.200**	.240**	.253**	.224**	.210**	.252**	.249**	.297**	.313**
IEI1	.315**	.240**	.198**	.180**	.106**	.268**	.192**	.228**	.136**	.266**	.267**	.327**	.240**	.111**	.287**	-.079*	-.116**	-.149**	-.071*	.227**	.244**	.108**	.186**	.227**	.224**	.234**	.129**	.264**	.139**	.145**	.204**	.175**	.233**	1	.492**	.457**	.446**	.388**	.299**	.263**	.190**	.303**	.202**	.252**	.259**	.330**
IEI2	.366**	.319**	.330**	.219**	.098**	.186**	.180**	.281**	.109**	.272**	.292**	.216**	.232**	.154**	.300**	-.118**	-.194**	-.177**	-.077*	.191**	.257**	.162**	.159**	.163**	.193**	.234**	.153**	.236**	.182**	.169**	.210**	.178**	.182**	.492**	1	.446**	.524**	.424**	.281**	.325**	.174**	.289**	.230**	.245**	.303**	.316**
IEI3	.263**	.215**	.208**	.183**	.127**	.286**	.237**	.321**	.196**	.400**	.342**	.381**	.354**	.122**	.386**	-.147**	-.160**	-.263**	-.132**	.282**	.369**	0.041	.182**	.255**	.279**	.316**	.195**	.270**	.180**	.238**	.310**	.205**	.145**	.457**	.446**	1	.597**	.502**	.312**	.300**	.109**	.381**	.228**	.291**	.298**	.387**
IEI4	.301**	.256**	.267**	.196**	.185**	.295**	.240**	.292**	.198**	.428**	.366**	.368**	.417**	.153**	.443**	-.114**	-.150**	-.185**	-.071*	.338**	.425**	.125**	.237**	.248**	.288**	.318**	.207**	.295**	.198**	.217**	.320**	.253**	.181**	.446**	.524**	.597**	1	.594**	.385**	.315**	.166**	.421**	.284**	.367**	.394**	.445**
IEI5	.266**	.262**	.258**	.257**	.209**	.261**	.257**	.303**	.200**	.346**	.346**	.405**	.345**	.175**	.386**	-.076*	-.108**	-.121**	-.068*	.310**	.370**	.109**	.206**	.243**	.291**	.302**	.262**	.248**	.178**	.204**	.298**	.280**	.200**	.388**	.424**	.502**	.594**	1	.430**	.334**	.203**	.422**	.288**	.356**	.358**	.405**
IEI6	.202**	.177**	.164**	.229**	.181**	.170**	.238**	.220**	.093**	.260**	.225**	.263**	.240**	.101**	.276**	-0.021	-0.024	-0.039	0.016	.247**	.305**	.183**	.213**	.205**	.250**	.271**	.236**	.268**	.246**	.246**	.308**	.285**	.240**	.299**	.281**	.312**	.385**	.430**	1	.310**	.239**	.321**	.264**	.279**	.289**	.332**
IEI7	.158**	.135**	.178**	.173**	.101**	.205**	.113**	.190**	.096**	.220**	.227**	.217**	.212**	.169**	.250**	-.113**	-.309**	-.274**	-.183**	0.036	.204**	.062*	0.051	.156**	.163**	.159**	.169**	.249**	.223**	.247**	.196**	.130**	.253**	.263**	.325**	.300**	.315**	.334**	.310**	1	.245**	.255**	.181**	.194**	.275**	.299**
EEI1	.149**	.172**	.185**	.152**	.102**	.135**	.174**	.153**	.118**	.108**	.140**	.165**	.109**	.132**	.161**	-0.045	-.066*	-0.033	-0.032	0.048	.081**	.148**	.082**	.140**	.141**	.117**	.138**	.219**	.192**	.128**	.162**	.192**	.224**	.190**	.174**	.109**	.166**	.203**	.239**	.245**	1	.301**	.310**	.229**	.266**	.244**
EEI2	.194**	.141**	.184**	.161**	.161**	.219**	.283**	.257**	.201**	.327**	.315**	.323**	.275**	.155**	.303**	-.090**	-.098**	-.131**	-0.034	.270**	.322**	.118**	.176**	.315**	.343**	.363**	.238**	.276**	.229**	.241**	.385**	.306**	.210**	.303**	.289**	.381**	.421**	.422**	.321**	.255**	.301**	1	.417**	.481**	.425**	.473**
EEI3	.141**	.146**	.172**	.153**	.111**	.161**	.227**	.222**	.130**	.203**	.248**	.246**	.197**	.208**	.264**	-.072*	-.068*	-0.056	0.011	.122**	.155**	.099**	.087**	.204**	.235**	.211**	.229**	.256**	.351**	.286**	.288**	.261**	.252**	.202**	.230**	.228**	.284**	.288**	.264**	.181**	.310**	.417**	1	.485**	.464**	.471**
EEI4	.149**	.164**	.178**	.179**	.180**	.236**	.250**	.239**	.169**	.268**	.271**	.280**	.234**	.202**	.331**	-.087**	-.063*	-.088**	-0.038	.231**	.222**	.099**	.164**	.380**	.447**	.379**	.319**	.350**	.274**	.269**	.349**	.344**	.249**	.252**	.245**	.291**	.367**	.356**	.279**	.194**	.229**	.481**	.485**	1	.667**	.630**
EEI5	.136**	.167**	.186**	.186**	.200**	.225**	.211**	.226**	.127**	.264**	.276**	.269**	.234**	.184**	.340**	-.081**	-.082**	-.075*	-0.032	.189**	.266**	.132**	.177**	.344**	.406**	.386**	.345**	.421**	.330**	.314**	.411**	.339**	.297**	.259**	.303**	.298**	.394**	.358**	.289**	.275**	.266**	.425**	.464**	.667**	1	.659**
EEI6	.157**	.162**	.162**	.165**	.146**	.244**	.270**	.257**	.193**	.317**	.291**	.336**	.297**	.181**	.336**	-.113**	-.075*	-.124**	-.064*	.245**	.295**	.121**	.207**	.389**	.421**	.363**	.279**	.387**	.332**	.353**	.404**	.366**	.313**	.330**	.316**	.387**	.445**	.405**	.332**	.299**	.244**	.473**	.471**	.630**	.659**	1
** Correlation is significant at the 0.01 level (2-tailed).
* Correlation is significant at the 0.05 level (2-tailed).

## Sheet: Table-S4_PCA
	KMO and Bartlett's Test
	Kaiser-Meyer-Olkin Measure of Sampling Adequacy.		0.931
	Bartlett's Test of Sphericity	Approx. Chi-Square	18614.6
		df	1035
		Sig.	0		Communalities
						Initial	Extraction			Total Variance Explained
					MH1	1	0.648			Component	Initial Eigenvalues			Extraction Sums of Squared Loadings			Rotation Sums of Squared Loadings
					MH2	1	0.741				Total	% of Variance	Cumulative %	Total	% of Variance	Cumulative %	Total	% of Variance	Cumulative %
					MH3	1	0.649			1	11.138	24.213	24.213	11.138	24.213	24.213	4.125	8.967	8.967
					MH4	1	0.522			2	3.019	6.563	30.776	3.019	6.563	30.776	3.95	8.587	17.555
					MH5	1	0.378			3	2.562	5.569	36.345	2.562	5.569	36.345	3.31	7.196	24.75
					HSB1	1	0.442			4	2.247	4.884	41.23	2.247	4.884	41.23	3.124	6.792	31.543
					HSB2	1	0.502			5	1.678	3.647	44.877	1.678	3.647	44.877	2.771	6.023	37.566
					HSB3	1	0.395			6	1.444	3.138	48.015	1.444	3.138	48.015	2.577	5.603	43.169
					HSB4	1	0.423			7	1.294	2.812	50.828	1.294	2.812	50.828	2.44	5.304	48.473
					HSB5	1	0.665			8	1.038	2.255	53.083	1.038	2.255	53.083	1.722	3.743	52.215
					HSB6	1	0.639			9	1.01	2.196	55.28	1.01	2.196	55.28	1.41	3.064	55.28
					HSB7	1	0.599			10	0.99	2.153	57.432
					HSB8	1	0.602			11	0.975	2.119	59.551
					HSB9	1	0.468			12	0.941	2.047	61.598
					HSB10	1	0.52			13	0.863	1.877	63.475
					GPI1	1	0.405			14	0.815	1.772	65.247
					GPI2	1	0.686			15	0.797	1.733	66.98
					GPI3	1	0.656			16	0.768	1.67	68.649
					GPI4	1	0.508			17	0.746	1.622	70.272
					GPI5	1	0.573			18	0.708	1.54	71.812
					GPI6	1	0.587			19	0.699	1.52	73.332
					GPI7	1	0.359			20	0.663	1.441	74.773
					SEI1	1	0.392			21	0.653	1.42	76.193
					SEI2	1	0.627			22	0.632	1.374	77.567
					SEI3	1	0.688			23	0.606	1.317	78.884
					SEI4	1	0.577			24	0.589	1.28	80.164
					SEI5	1	0.433			25	0.568	1.235	81.399
					SEI6	1	0.538			26	0.561	1.22	82.619
					SEI7	1	0.575			27	0.535	1.164	83.782
					SEI8	1	0.492			28	0.518	1.125	84.907
					SEI9	1	0.601			29	0.508	1.105	86.012
					SEI10	1	0.406			30	0.49	1.065	87.077
					SEI11	1	0.557			31	0.485	1.055	88.132
					IEI1	1	0.543			32	0.459	0.998	89.13
					IEI2	1	0.586			33	0.454	0.986	90.116
					IEI3	1	0.581			34	0.448	0.974	91.09
					IEI4	1	0.665			35	0.419	0.912	92.002
					IEI5	1	0.54			36	0.41	0.892	92.894
					IEI6	1	0.508			37	0.403	0.876	93.77
					IEI7	1	0.506			38	0.378	0.821	94.591
					EEI1	1	0.465			39	0.362	0.786	95.377
					EEI2	1	0.52			40	0.351	0.762	96.139
					EEI3	1	0.604			41	0.329	0.716	96.855
					EEI4	1	0.722			42	0.31	0.673	97.529
					EEI5	1	0.664			43	0.309	0.671	98.2
					EEI6	1	0.67			44	0.294	0.64	98.84
					Extraction Method: Principal Component Analysis.					45	0.272	0.592	99.432
										46	0.261	0.568	100
										Extraction Method: Principal Component Analysis.
				Component Matrixa
					Component											Rotated Component Matrixa
					1	2	3	4	5	6	7	8	9				Component
				I am most afraid of coronavirus recent outbreak in Bangladesh	0.394	-0.372	0.234	0.508	0.072	-0.138	-0.098	-0.026	0.08				PC1	PC2	PC3	PC4	PC5	PC6	PC7	PC8	PC9
				I am afraid of getting coronavirus	0.36	-0.317	0.171	0.614	0.124	-0.179	-0.112	-0.203	0.058			MH1	0.122	-0.034	0.25	0.03	0.746	-0.048	0.065	0.049	0.055
				I am afraid of losing my life or my relatives' life due to this outbreak	0.377	-0.318	0.13	0.554	0.122	-0.149	-0.086	-0.192	0.027			MH2	0.041	0.051	0.162	0.094	0.832	-0.041	0.05	-0.047	-0.061
				All the news and numbers of COVID-19 in different media increasing my tension	0.369	-0.155	0.187	0.421	0.212	-0.189	-0.129	0.184	-0.138			MH3	0.064	0.07	0.172	0.112	0.764	-0.071	0.052	-0.071	-0.031
				It makes me uncomfortable to be detached from regular activities	0.335	0.038	0.215	0.225	0.194	-0.217	-0.158	0.236	0.039			MH4	0.103	0.088	0.005	0.029	0.613	0.012	0.106	0.118	0.32
				Health system of Bangladesh is fragile to deal with the recent outbreak of COVID-19	0.432	-0.225	0.082	-0.118	0.044	0.004	-0.147	0.399	-0.032			MH5	0.171	0.123	-0.036	-0.002	0.41	0.126	0.067	0.313	0.213
				A huge population is a pressure to the existing health system to deal with COVID-19	0.454	-0.017	0.196	-0.105	0.134	0.001	-0.21	0.217	-0.371			HSB1	0.347	-0.047	0.168	0.055	0.106	-0.173	0.098	0.3	0.383
				There is a lack of awareness of basic health issues in most of the citizens of Bangladesh	0.516	-0.145	0.112	-0.157	0.148	-0.137	-0.017	0.033	-0.169			HSB2	0.334	0.031	-0.088	0.204	0.126	-0.024	0.353	0.12	0.43
				There is a lack of trained doctors and health professional to deal with the COVID-19	0.354	-0.159	0.184	-0.336	0.344	0.041	-0.029	-0.023	0.068			HSB3	0.459	0.187	0.052	0.076	0.162	-0.123	0.244	0.03	0.197
				There is a lack of health facilities to combat the COVID-19 outbreak in Bangladesh	0.607	-0.236	0.262	-0.37	0.154	-0.034	-0.001	0.024	0.098			HSB4	0.637	0.018	-0.008	0.105	0.024	0.003	-0.031	0.009	0.065
				There is a lack of health infrastructure to deal with COVID-19	0.577	-0.24	0.236	-0.34	0.233	0.038	0.014	-0.022	0.146			HSB5	0.743	0.065	0.218	0.071	0.073	-0.058	0.165	0.124	0.071
				There is a severe lack of bio-medical waste management facilities in Bangladesh	0.605	-0.175	0.209	-0.353	0.14	-0.002	-0.014	0.081	0.089			HSB6	0.746	0.056	0.213	0.122	0.086	-0.028	0.057	0.072	0.045
				There is a lack of COVID-19 testing facility in Bangladesh	0.574	-0.159	0.258	-0.377	0.093	-0.081	0.097	-0.096	0.069			HSB7	0.682	0.089	0.216	0.108	0.034	-0.051	0.147	0.166	0.119
				There is a lack of budget or financial support to response to this outbreak	0.353	-0.078	0.002	-0.171	0.477	-0.028	0.077	-0.247	0.112			HSB8	0.689	0.149	0.221	0.031	0.026	-0.013	0.231	0.034	-0.027
				Most of the poor people will not have access to existing health facilities if they are infected by COVID-19	0.625	-0.095	0.117	-0.198	0.024	-0.072	0.144	-0.198	-0.044			HSB9	0.54	0.263	-0.058	0.166	0.137	0.004	-0.172	-0.143	-0.081
				Bangladesh government can deal with this outbreak	-0.148	0.373	0.355	0.148	-0.056	0.059	0.238	0.165	0.073			HSB10	0.5	0.292	0.26	0.135	0.095	-0.052	0.286	-0.072	-0.026
				Government is taking this outbreak seriously to deal with	-0.147	0.576	0.554	0.054	0.101	0.086	0.029	-0.01	0.068			GPI1	-0.162	-0.001	0.065	-0.183	-0.061	0.571	0.029	0.062	0.078
				Government is taking proper decisions in the right time	-0.218	0.536	0.476	0.122	0.165	0.181	0.084	-0.007	0.11			GPI2	-0.017	-0.05	-0.186	-0.012	-0.056	0.787	0.111	0.1	-0.059
				Government is involving other sector actors to combat the COVID-19 outbreak	-0.077	0.452	0.494	0.087	0.116	0.14	0.078	-0.064	0.055			GPI3	-0.074	-0.07	-0.158	0.012	-0.05	0.783	-0.044	0.026	-0.039
				Government need support from the people to reduce the impact of COVID-19	0.447	0.174	0.425	-0.109	-0.319	-0.062	-0.063	-0.066	-0.192			GPI4	0.018	-0.041	-0.096	0.035	-0.001	0.698	0.078	0.001	-0.047
				Government need to formulate a policy and action plan and implement it immediately	0.547	0.05	0.261	-0.12	-0.331	-0.129	0.12	-0.092	-0.232			GPI5	0.205	0.047	0.175	0.098	0.032	0.214	0.651	0.133	0.006
				The developed nations are going to support Bangladesh in response to COVID-19	0.207	0.169	0.283	0.218	0.086	0.159	0.33	-0.119	-0.07			GPI6	0.233	0.211	0.298	0.033	0.033	0.044	0.627	0.011	0.039
				Shut down or lockdown of regular activities is a good decision to reduce the chance of infection of COVID-19	0.355	0.113	0.276	0.048	-0.258	-0.149	-0.098	-0.044	-0.272			GPI7	0.056	0.156	0.205	0.068	0.151	0.432	0.085	-0.246	0.088
				Shut down or lockdown or social distancing will have an economic and social impact in future	0.511	0.39	-0.014	-0.006	-0.133	-0.159	-0.232	0.206	0.273			SEI1	0.053	0.086	0.071	0.068	0.152	0.085	0.574	0.09	0.063
				The formal and informal business will be hampered	0.572	0.362	-0.087	-0.044	-0.155	-0.193	-0.299	0.167	0.206			SEI2	0.092	0.336	0.135	0.211	0.035	0.115	0.157	0.636	-0.018
				Poor people living in hand to mouth will be severely affected	0.584	0.28	-0.067	-0.017	-0.185	-0.303	-0.096	-0.131	0.005			SEI3	0.108	0.37	0.103	0.267	0.035	0	0.225	0.637	-0.024
				Most of the poor people living in urban areas have to leave due to not having any options for income	0.464	0.326	-0.158	0.014	0.066	-0.236	0.137	-0.091	0.006			SEI4	0.115	0.493	0.107	0.188	0.105	-0.045	0.397	0.291	-0.136
				Many people will lose their livelihood/ jobs at a time	0.546	0.276	-0.29	0.081	0.015	-0.195	0.161	-0.034	0.087			SEI5	0.109	0.606	0.051	0.124	0.052	0.055	0.131	0.111	-0.024
				There will be less supply of basic goods/ products for daily use	0.451	0.258	-0.338	0.052	0.266	-0.135	0.275	-0.078	-0.131			SEI6	0.059	0.657	0.192	0.171	0.073	-0.036	0.05	0.164	0.002
				Price of most of the basic products will be higher than usual	0.471	0.207	-0.324	-0.042	0.1	-0.235	0.16	-0.004	-0.172			SEI7	0.106	0.702	0.014	0.18	0.042	-0.024	-0.035	-0.108	0.152
				Poor people will suffer food and nutritional deficiency	0.599	0.305	-0.19	-0.053	-0.079	-0.252	0.082	-0.162	-0.088			SEI8	0.106	0.636	0.014	0.12	-0.003	-0.151	0.126	0.024	0.151
				The formal education system will be hampered	0.474	0.366	-0.107	0.045	0.019	0	0.001	0.121	0.138			SEI9	0.132	0.638	0.107	0.205	0.02	-0.057	0.322	0.115	-0.054
				There is a chance of social conflict due to this outbreak	0.438	0.178	-0.25	0.124	0.268	-0.081	0.257	0.249	0.222			SEI10	0.072	0.418	0.158	0.261	0.001	0.151	0.033	0.317	0.089
				There is a chance of community transmission of COVID-19 in Bangladesh	0.525	-0.197	0.042	0.13	-0.243	0.176	0.158	0.157	0.265			SEI11	0.137	0.548	0.208	0.058	0.101	0.059	-0.29	0.201	0.229
				A huge number of people will be infected	0.538	-0.274	0.006	0.243	-0.208	0.154	0.219	-0.112	0.187			IEI1	0.151	0.058	0.663	0.111	0.153	-0.031	0.025	0.177	0.093
				There is a chance of not detecting most of the infected patients due to lack of health facilities leads to undermining the actual infected case	0.622	-0.236	0.015	-0.06	-0.332	0.062	0.082	-0.006	0.118			IEI2	0.126	0.122	0.655	0.164	0.291	-0.078	0.057	-0.062	-0.036
				There is a chance to increase in the number of death for not having proper health facilities	0.684	-0.192	0.083	0.019	-0.305	0.177	0.118	-0.084	0.092			IEI3	0.263	0.108	0.591	0.145	0.084	-0.198	0.261	0.125	-0.007
				Lack of bio-medical waste management facilities in Bangladesh will create more problem	0.651	-0.136	0.089	0.062	-0.201	0.179	0.102	0.048	0.017			IEI4	0.267	0.111	0.642	0.253	0.135	-0.081	0.28	0.039	-0.001
				There will be many people with psychosocially shocked due to this outbreak	0.53	0.061	0.04	0.139	-0.104	0.128	0.265	0.208	-0.248			IEI5	0.239	0.121	0.546	0.244	0.151	-0.03	0.239	0.068	0.156
				The government will lose its trust to the people	0.444	-0.226	-0.275	0.063	-0.025	0.085	0.315	0.265	-0.039			IEI6	0.064	0.277	0.383	0.141	0.078	0.087	0.256	-0.039	0.424
				There is a chance of disaster like flood, cyclone, drought etc. in 2020 considering the climate change vulnerability of Bangladesh	0.35	0.022	-0.118	0.213	0.253	0.315	0.074	0.221	-0.255			IEI7	0.104	0.281	0.453	0.033	0.04	-0.251	-0.083	-0.034	0.37
				If any disaster (flood, cyclone etc.) occur after the COVID-19 situation then it will create a double burden to the country	0.62	0.062	-0.071	-0.004	-0.076	0.283	-0.159	-0.014	-0.123			EEI1	0.041	0.157	0.114	0.345	0.131	0.043	-0.085	-0.107	0.519
				There is a chance of severe food scarcity due to these events (COVID-19 + Disasters) in the country	0.509	0.131	-0.191	0.085	0.236	0.396	-0.118	-0.163	-0.176			EEI2	0.182	0.146	0.261	0.541	0.043	-0.061	0.236	0.102	0.181
				High possibility of huge economical loss	0.626	0.213	-0.187	0.046	0.042	0.294	-0.375	-0.131	0.048			EEI3	0.157	0.227	0.068	0.683	0.082	0.008	0.002	-0.124	0.187
				High possibility of increasing the poverty level	0.642	0.222	-0.234	0.089	0.037	0.267	-0.212	-0.143	0.04			EEI4	0.154	0.208	0.119	0.75	0.093	-0.041	0.093	0.244	0.004
				High possibility of severe socio-economic and health crisis	0.682	0.167	-0.204	0.012	-0.03	0.3	-0.195	-0.069	0.035			EEI5	0.119	0.321	0.194	0.686	0.09	-0.027	0.067	0.16	0.021
				Extraction Method: Principal Component Analysis.												EEI6	0.171	0.27	0.274	0.659	0.029	-0.059	0.11	0.191	0.073
				a 9 components extracted.												Eigenvalues	4.125	3.95	3.31	3.124	2.771	2.577	2.44	1.722	1.41
																% of Variance	8.967	8.587	7.196	6.792	6.023	5.603	5.304	3.743	3.064
																Cumulative %	8.967	17.555	24.75	31.543	37.566	43.169	48.473	52.215	55.28
																Extraction Method: Principal Component Analysis.
																Rotation Method: Varimax with Kaiser Normalization.
																a Rotation converged in 14 iterations.

## Sheet: Table-S5_Regression analysis
Model Summary										Model Summary											Model Summary										Model Summary												Model Summary
Model	R	R Square	Adjusted R Square	Std. Error of the Estimate						Model	R	R Square	Adjusted R Square	Std. Error of the Estimate							Model	R	R Square	Adjusted R Square	Std. Error of the Estimate						Model	R	R Square	Adjusted R Square	Std. Error of the Estimate								Model	R	R Square	Adjusted R Square	Std. Error of the Estimate
1	.687a	0.472	0.449	0.75162						1	.502a	0.252	0.219	0.89242							1	.492a	0.242	0.209	1.14184						1	.692a	0.479	0.456	0.57089								1	.629a	0.396	0.369	0.64904
ANOVAa										ANOVAa											ANOVAa										ANOVAa												ANOVAa
Model		Sum of Squares	df	Mean Square	F	Sig.				Model		Sum of Squares	df	Mean Square	F	Sig.					Model		Sum of Squares	df	Mean Square	F	Sig.				Model		Sum of Squares	df	Mean Square	F	Sig.						Model		Sum of Squares	df	Mean Square	F	Sig.
1	Regression	515.149	45	11.448	20.264	.000b				1	Regression	273.054	45	6.068	7.619	.000b					1	Regression	424.586	45	9.435	7.237	.000b				1	Regression	305.927	45	6.798	20.859	.000b						1	Regression	281.766	45	6.261	14.864	.000b
	Residual	576.232	1020	0.565							Residual	812.339	1020	0.796								Residual	1329.88	1020	1.304							Residual	332.438	1020	0.326									Residual	429.672	1020	0.421
	Total	1091.38	1065								Total	1085.39	1065									Total	1754.47	1065								Total	638.365	1065										Total	711.438	1065
a Dependent Variable: I am most afraid of coronavirus recent outbreak in Bangladesh										a Dependent Variable: Health system of Bangladesh is fragile to deal with the recent outbreak of COVID-19											a Dependent Variable: Bangladesh government can deal with this outbreak										a Dependent Variable: Shut down or lockdown or social distancing will have an economic and social impact in future												a Dependent Variable: There is a chance of community transmission of COVID-19 in Bangladesh
Coefficientsa																																											Coefficientsa
Model		Unstandardized Coefficients		Standardized Coefficients	t	Sig.	95.0% Confidence Interval for B				Coefficientsa										Coefficientsa										Coefficientsa												Model		Unstandardized Coefficients		Standardized Coefficients	t	Sig.
		B	Std. Error	Beta			Lower Bound	Upper Bound			Model		Unstandardized Coefficients		Standardized Coefficients	t	Sig.	95.0% Confidence Interval for B			Model		Unstandardized Coefficients		Standardized Coefficients	t	Sig.	95.0% Confidence Interval for B			Model		Unstandardized Coefficients		Standardized Coefficients	t	Sig.	95.0% Confidence Interval for B							B	Std. Error	Beta
MH1	(Constant)	0.297	0.281		1.055	0.291	-0.255	0.849					B	Std. Error	Beta			Lower Bound	Upper Bound				B	Std. Error	Beta			Lower Bound	Upper Bound				B	Std. Error	Beta			Lower Bound	Upper Bound				IEI1	(Constant)	0.66	0.242		2.726	0.007
MH2	I am afraid of getting coronavirus	0.314	0.03	0.335	10.357	0	0.255	0.374			HSB1	(Constant)	0.514	0.334		1.539	0.124	-0.141	1.169		GPI1	(Constant)	1.847	0.424		4.36	0	1.016	2.678		SEI2	(Constant)	-0.238	0.214		-1.112	0.266	-0.657	0.182				MH1	I am most afraid of coronavirus recent outbreak in Bangladesh	0.078	0.027	0.096	2.889	0.004
MH3	I am afraid of losing my life or my relatives' life due to this outbreak	0.14	0.03	0.151	4.736	0	0.082	0.198			MH1	I am most afraid of coronavirus recent outbreak in Bangladesh	0.075	0.037	0.075	2.02	0.044	0.002	0.148		MH1	I am most afraid of coronavirus recent outbreak in Bangladesh	-0.035	0.048	-0.028	-0.736	0.462	-0.128	0.058		MH1	I am most afraid of coronavirus recent outbreak in Bangladesh	0.025	0.024	0.033	1.052	0.293	-0.022	0.072				MH2	I am afraid of getting coronavirus	0.046	0.028	0.061	1.673	0.095
MH4	All the news and numbers of COVID-19 in different media increasing my tension	0.181	0.026	0.188	6.984	0	0.13	0.232			MH2	I am afraid of getting coronavirus	-0.052	0.038	-0.056	-1.385	0.166	-0.127	0.022		MH2	I am afraid of getting coronavirus	0.003	0.048	0.003	0.062	0.951	-0.092	0.098		MH2	I am afraid of getting coronavirus	-0.044	0.024	-0.061	-1.815	0.07	-0.091	0.004				MH3	I am afraid of losing my life or my relatives' life due to this outbreak	0.077	0.026	-0.102	-2.99	0.003
MH5	It makes me uncomfortable to be detached from regular activities	0.041	0.025	0.042	1.652	0.099	-0.008	0.089			MH3	I am afraid of losing my life or my relatives' life due to this outbreak	0.018	0.036	0.019	0.502	0.616	-0.052	0.088		MH3	I am afraid of losing my life or my relatives' life due to this outbreak	0.021	0.046	0.018	0.467	0.641	-0.068	0.111		MH3	I am afraid of losing my life or my relatives' life due to this outbreak	0.054	0.023	0.076	2.391	0.017	0.01	0.099				MH4	All the news and numbers of COVID-19 in different media increasing my tension	-0.005	0.023	-0.007	-0.235	0.814
HSB1	Health system of Bangladesh is fragile to deal with the recent outbreak of COVID-19	0.053	0.026	0.053	2.02	0.044	0.002	0.105			MH4	All the news and numbers of COVID-19 in different media increasing my tension	0.043	0.031	0.045	1.382	0.167	-0.018	0.105		MH4	All the news and numbers of COVID-19 in different media increasing my tension	-0.016	0.04	-0.013	-0.406	0.685	-0.095	0.063		MH4	All the news and numbers of COVID-19 in different media increasing my tension	-0.035	0.02	-0.047	-1.721	0.086	-0.074	0.005				MH5	It makes me uncomfortable to be detached from regular activities	-0.02	0.021	-0.026	-0.948	0.343
HSB2	A huge population is a pressure to the existing health system to deal with COVID-19	0.019	0.031	0.016	0.608	0.543	-0.042	0.079			MH5	It makes me uncomfortable to be detached from regular activities	0.033	0.029	0.034	1.11	0.267	-0.025	0.09		MH5	It makes me uncomfortable to be detached from regular activities	0.016	0.038	0.013	0.413	0.679	-0.058	0.089		MH5	It makes me uncomfortable to be detached from regular activities	0.015	0.019	0.02	0.776	0.438	-0.022	0.051				HSB1	Health system of Bangladesh is fragile to deal with the recent outbreak of COVID-19	0.062	0.023	0.077	2.748	0.006
HSB3	There is a lack of awareness of basic health issues in most of the citizens of Bangladesh	-0.001	0.036	0	-0.016	0.987	-0.071	0.07			HSB2	A huge population is a pressure to the existing health system to deal with COVID-19	0.125	0.036	0.108	3.441	0.001	0.054	0.196		HSB1	Health system of Bangladesh is fragile to deal with the recent outbreak of COVID-19	0.013	0.04	0.01	0.33	0.742	-0.065	0.092		HSB1	Health system of Bangladesh is fragile to deal with the recent outbreak of COVID-19	0.005	0.02	0.006	0.225	0.822	-0.035	0.044				HSB2	A huge population is a pressure to the existing health system to deal with COVID-19	-0.018	0.027	-0.019	-0.666	0.505
HSB4	There is a lack of trained doctors and health professional to deal with the COVID-19	0.048	0.027	0.048	1.809	0.071	-0.004	0.101			HSB3	There is a lack of awareness of basic health issues in most of the citizens of Bangladesh	0.048	0.042	0.037	1.119	0.263	-0.036	0.131		HSB2	A huge population is a pressure to the existing health system to deal with COVID-19	-0.083	0.047	-0.057	-1.779	0.076	-0.175	0.009		HSB2	A huge population is a pressure to the existing health system to deal with COVID-19	0.019	0.023	0.021	0.811	0.418	-0.027	0.065				HSB3	There is a lack of awareness of basic health issues in most of the citizens of Bangladesh	-0.015	0.031	-0.014	-0.483	0.629
HSB5	There is a lack of health facilities to combat the COVID-19 outbreak in Bangladesh	-0.04	0.049	-0.029	-0.798	0.425	-0.137	0.058			HSB4	There is a lack of trained doctors and health professional to deal with the COVID-19	0.021	0.032	0.021	0.655	0.512	-0.041	0.083		HSB3	There is a lack of awareness of basic health issues in most of the citizens of Bangladesh	0.029	0.054	0.018	0.54	0.589	-0.077	0.136		HSB3	There is a lack of awareness of basic health issues in most of the citizens of Bangladesh	-0.007	0.027	-0.007	-0.252	0.801	-0.06	0.046				HSB4	There is a lack of trained doctors and health professional to deal with the COVID-19	-0.005	0.023	-0.007	-0.233	0.816
HSB6	There is a lack of health infrastructure to deal with COVID-19	-0.015	0.043	-0.012	-0.346	0.73	-0.1	0.07			HSB5	There is a lack of health facilities to combat the COVID-19 outbreak in Bangladesh	0.296	0.058	0.215	5.094	0	0.182	0.41		HSB4	There is a lack of trained doctors and health professional to deal with the COVID-19	-0.083	0.041	-0.065	-2.041	0.041	-0.162	-0.003		HSB4	There is a lack of trained doctors and health professional to deal with the COVID-19	-0.001	0.02	-0.001	-0.051	0.959	-0.041	0.039				HSB5	There is a lack of health facilities to combat the COVID-19 outbreak in Bangladesh	-0.067	0.043	-0.061	-1.58	0.114
HSB7	There is a severe lack of bio-medical waste management facilities in Bangladesh	0.031	0.045	0.022	0.685	0.494	-0.058	0.12			HSB6	There is a lack of health infrastructure to deal with COVID-19	0.003	0.052	0.002	0.051	0.96	-0.099	0.104		HSB5	There is a lack of health facilities to combat the COVID-19 outbreak in Bangladesh	-0.008	0.075	-0.005	-0.11	0.913	-0.156	0.139		HSB5	There is a lack of health facilities to combat the COVID-19 outbreak in Bangladesh	0.085	0.038	0.081	2.269	0.023	0.011	0.159				HSB6	There is a lack of health infrastructure to deal with COVID-19	-0.005	0.038	-0.005	-0.126	0.899
HSB8	There is a lack of COVID-19 testing facility in Bangladesh	0.087	0.046	0.061	1.897	0.058	-0.003	0.177			HSB7	There is a severe lack of bio-medical waste management facilities in Bangladesh	0.103	0.054	0.075	1.924	0.055	-0.002	0.209		HSB6	There is a lack of health infrastructure to deal with COVID-19	0.023	0.066	0.014	0.354	0.723	-0.106	0.153		HSB6	There is a lack of health infrastructure to deal with COVID-19	-0.051	0.033	-0.051	-1.547	0.122	-0.116	0.014				HSB7	There is a severe lack of bio-medical waste management facilities in Bangladesh	0.169	0.039	0.152	4.355	0
HSB9	There is a lack of budget or financial support to response to this outbreak	-0.012	0.022	-0.015	-0.556	0.578	-0.056	0.031			HSB8	There is a lack of COVID-19 testing facility in Bangladesh	-0.038	0.055	-0.027	-0.702	0.483	-0.145	0.069		HSB7	There is a severe lack of bio-medical waste management facilities in Bangladesh	-0.008	0.069	-0.005	-0.119	0.905	-0.143	0.127		HSB7	There is a severe lack of bio-medical waste management facilities in Bangladesh	-0.05	0.034	-0.047	-1.446	0.149	-0.117	0.018				HSB8	There is a lack of COVID-19 testing facility in Bangladesh	-0.04	0.04	-0.035	-1.019	0.308
HSB10	Most of the poor people will not have access to existing health facilities if they are infected by COVID-19	-0.078	0.041	-0.057	-1.885	0.06	-0.159	0.003			HSB9	There is a lack of budget or financial support to response to this outbreak	-0.033	0.027	-0.039	-1.256	0.209	-0.085	0.019		HSB8	There is a lack of COVID-19 testing facility in Bangladesh	0.096	0.07	0.053	1.374	0.17	-0.041	0.233		HSB8	There is a lack of COVID-19 testing facility in Bangladesh	0.011	0.035	0.01	0.325	0.745	-0.057	0.08				HSB9	There is a lack of budget or financial support to response to this outbreak	-0.012	0.019	-0.018	-0.646	0.519
GPI1	Bangladesh government can deal with this outbreak	-0.015	0.021	-0.019	-0.736	0.462	-0.056	0.025			HSB10	Most of the poor people will not have access to existing health facilities if they are infected by COVID-19	-0.016	0.049	-0.012	-0.321	0.748	-0.112	0.081		HSB9	There is a lack of budget or financial support to response to this outbreak	-0.206	0.033	-0.19	-6.164	0	-0.271	-0.14		HSB9	There is a lack of budget or financial support to response to this outbreak	0.002	0.017	0.003	0.122	0.903	-0.031	0.035				HSB10	Most of the poor people will not have access to existing health facilities if they are infected by COVID-19	0.019	0.036	0.017	0.534	0.593
GPI2	Government is taking this outbreak seriously to deal with	-0.025	0.026	-0.031	-0.948	0.343	-0.077	0.027			GPI1	Bangladesh government can deal with this outbreak	0.008	0.024	0.01	0.33	0.742	-0.04	0.056		HSB10	Most of the poor people will not have access to existing health facilities if they are infected by COVID-19	-0.028	0.063	-0.016	-0.441	0.66	-0.151	0.096		HSB10	Most of the poor people will not have access to existing health facilities if they are infected by COVID-19	0.022	0.031	0.021	0.687	0.492	-0.04	0.083				GPI1	Bangladesh government can deal with this outbreak	0.002	0.018	0.003	0.091	0.928
GPI3	Government is taking proper decisions in the right time	0.011	0.027	0.013	0.404	0.686	-0.041	0.063			GPI2	Government is taking this outbreak seriously to deal with	-0.007	0.031	-0.008	-0.212	0.832	-0.068	0.055		GPI2	Government is taking this outbreak seriously to deal with	0.253	0.039	0.248	6.445	0	0.176	0.33		GPI1	Bangladesh government can deal with this outbreak	0.056	0.016	0.093	3.595	0	0.025	0.086				GPI2	Government is taking this outbreak seriously to deal with	0.014	0.023	0.021	0.6	0.548
GPI4	Government is involving other sector actors to combat the COVID-19 outbreak	-0.02	0.025	-0.022	-0.794	0.427	-0.069	0.029			GPI3	Government is taking proper decisions in the right time	-0.076	0.032	-0.09	-2.425	0.015	-0.138	-0.015		GPI3	Government is taking proper decisions in the right time	0.149	0.04	0.139	3.719	0	0.071	0.228		GPI2	Government is taking this outbreak seriously to deal with	0.009	0.02	0.015	0.453	0.65	-0.03	0.048				GPI3	Government is taking proper decisions in the right time	-0.019	0.023	-0.028	-0.845	0.398
GPI5	Government need support from the people to reduce the impact of COVID-19	-0.008	0.039	-0.006	-0.192	0.848	-0.085	0.07			GPI4	Government is involving other sector actors to combat the COVID-19 outbreak	-0.007	0.03	-0.007	-0.221	0.825	-0.065	0.052		GPI4	Government is involving other sector actors to combat the COVID-19 outbreak	0.031	0.038	0.027	0.821	0.412	-0.043	0.105		GPI3	Government is taking proper decisions in the right time	0.045	0.02	0.069	2.229	0.026	0.005	0.085				GPI4	Government is involving other sector actors to combat the COVID-19 outbreak	-0.001	0.022	-0.001	-0.025	0.98
GPI6	Government need to formulate a policy and action plan and implement it immediately	0.036	0.045	0.025	0.798	0.425	-0.052	0.124			GPI5	Government need support from the people to reduce the impact of COVID-19	0.024	0.047	0.019	0.517	0.606	-0.068	0.116		GPI5	Government need support from the people to reduce the impact of COVID-19	-0.035	0.06	-0.021	-0.583	0.56	-0.153	0.083		GPI4	Government is involving other sector actors to combat the COVID-19 outbreak	0.012	0.019	0.017	0.613	0.54	-0.026	0.049				GPI5	Government need support from the people to reduce the impact of COVID-19	0.053	0.034	0.05	1.547	0.122
GPI7	The developed nations are going to support Bangladesh in response to COVID-19	0.049	0.025	0.049	1.956	0.051	0	0.098			GPI6	Government need to formulate a policy and action plan and implement it immediately	0.054	0.053	0.037	1.008	0.314	-0.051	0.159		GPI6	Government need to formulate a policy and action plan and implement it immediately	0.117	0.068	0.063	1.716	0.086	-0.017	0.251		GPI5	Government need support from the people to reduce the impact of COVID-19	0.038	0.03	0.038	1.253	0.211	-0.021	0.096				GPI6	Government need to formulate a policy and action plan and implement it immediately	-0.045	0.039	-0.038	-1.149	0.251
SEI1	Shut down or lockdown of regular activities is a good decision to reduce the chance of infection of COVID-19	0.024	0.034	0.019	0.719	0.472	-0.042	0.091			GPI7	The developed nations are going to support Bangladesh in response to COVID-19	-0.035	0.03	-0.035	-1.181	0.238	-0.093	0.023		GPI7	The developed nations are going to support Bangladesh in response to COVID-19	0.127	0.038	0.1	3.363	0.001	0.053	0.201		GPI6	Government need to formulate a policy and action plan and implement it immediately	-0.017	0.034	-0.015	-0.493	0.622	-0.084	0.05				GPI7	The developed nations are going to support Bangladesh in response to COVID-19	0.001	0.022	0.001	0.024	0.981
SEI2	Shut down or lockdown or social distancing will have an economic and social impact in future	0.043	0.041	0.033	1.052	0.293	-0.037	0.124			SEI1	Shut down or lockdown of regular activities is a good decision to reduce the chance of infection of COVID-19	0.018	0.04	0.014	0.441	0.659	-0.061	0.097		SEI1	Shut down or lockdown of regular activities is a good decision to reduce the chance of infection of COVID-19	0.07	0.051	0.042	1.361	0.174	-0.031	0.171		GPI7	The developed nations are going to support Bangladesh in response to COVID-19	-0.011	0.019	-0.015	-0.588	0.557	-0.048	0.026				SEI1	Shut down or lockdown of regular activities is a good decision to reduce the chance of infection of COVID-19	0.039	0.029	0.037	1.327	0.185
SEI3	The formal and informal business will be hampered	-0.012	0.047	-0.009	-0.261	0.794	-0.105	0.081			SEI2	Shut down or lockdown or social distancing will have an economic and social impact in future	0.011	0.049	0.008	0.225	0.822	-0.085	0.107		SEI2	Shut down or lockdown or social distancing will have an economic and social impact in future	0.224	0.062	0.135	3.595	0	0.102	0.346		SEI1	Shut down or lockdown of regular activities is a good decision to reduce the chance of infection of COVID-19	0.024	0.026	0.024	0.945	0.345	-0.026	0.075				SEI2	Shut down or lockdown or social distancing will have an economic and social impact in future	0.067	0.036	0.063	1.882	0.06
SEI4	Poor people living in hand to mouth will be severely affected	0.029	0.052	0.017	0.557	0.578	-0.073	0.132			SEI3	The formal and informal business will be hampered	-0.028	0.056	-0.02	-0.501	0.616	-0.139	0.082		SEI3	The formal and informal business will be hampered	-0.225	0.072	-0.126	-3.133	0.002	-0.365	-0.084		SEI3	The formal and informal business will be hampered	0.517	0.032	0.48	16.078	0	0.454	0.58				SEI3	The formal and informal business will be hampered	-0.034	0.041	-0.03	-0.821	0.412
SEI5	Most of the poor people living in urban areas have to leave due to not having any options for income	-0.012	0.033	-0.01	-0.354	0.724	-0.076	0.053			SEI4	Poor people living in hand to mouth will be severely affected	-0.001	0.062	-0.001	-0.021	0.983	-0.123	0.121		SEI4	Poor people living in hand to mouth will be severely affected	0.037	0.079	0.017	0.467	0.641	-0.119	0.193		SEI4	Poor people living in hand to mouth will be severely affected	0.098	0.04	0.077	2.484	0.013	0.021	0.176				SEI4	Poor people living in hand to mouth will be severely affected	0.003	0.045	0.002	0.057	0.954
SEI6	Many people will lose their livelihood/ jobs at a time	-0.008	0.036	-0.007	-0.213	0.831	-0.079	0.063			SEI5	Most of the poor people living in urban areas have to leave due to not having any options for income	-0.02	0.039	-0.018	-0.52	0.603	-0.096	0.056		SEI5	Most of the poor people living in urban areas have to leave due to not having any options for income	0.035	0.05	0.024	0.702	0.483	-0.063	0.132		SEI5	Most of the poor people living in urban areas have to leave due to not having any options for income	-0.006	0.025	-0.007	-0.244	0.808	-0.055	0.043				SEI5	Most of the poor people living in urban areas have to leave due to not having any options for income	-0.054	0.028	-0.058	-1.91	0.056
SEI7	There will be less supply of basic goods/ products for daily use	-0.047	0.031	-0.045	-1.522	0.128	-0.108	0.014			SEI6	Many people will lose their livelihood/ jobs at a time	-0.001	0.043	-0.001	-0.017	0.987	-0.085	0.084		SEI6	Many people will lose their livelihood/ jobs at a time	-0.005	0.055	-0.003	-0.092	0.927	-0.113	0.103		SEI6	Many people will lose their livelihood/ jobs at a time	0.01	0.027	0.011	0.35	0.726	-0.044	0.064				SEI6	Many people will lose their livelihood/ jobs at a time	0.082	0.031	0.086	2.624	0.009
SEI8	Price of most of the basic products will be higher than usual	-0.027	0.033	-0.024	-0.83	0.407	-0.092	0.037			SEI7	There will be less supply of basic goods/ products for daily use	0.002	0.037	0.002	0.05	0.96	-0.07	0.074		SEI7	There will be less supply of basic goods/ products for daily use	0.045	0.047	0.034	0.967	0.334	-0.047	0.138		SEI7	There will be less supply of basic goods/ products for daily use	0.013	0.023	0.017	0.565	0.572	-0.033	0.059				SEI7	There will be less supply of basic goods/ products for daily use	-0.016	0.027	-0.019	-0.587	0.558
SEI9	Poor people will suffer food and nutritional deficiency	-0.054	0.045	-0.038	-1.185	0.236	-0.143	0.035			SEI8	Price of most of the basic products will be higher than usual	0.012	0.039	0.011	0.316	0.752	-0.064	0.089		SEI8	Price of most of the basic products will be higher than usual	-0.068	0.05	-0.047	-1.355	0.176	-0.166	0.03		SEI8	Price of most of the basic products will be higher than usual	0.049	0.025	0.056	1.954	0.041	0	0.098				SEI8	Price of most of the basic products will be higher than usual	-0.039	0.028	-0.042	-1.378	0.169
SEI10	The formal education system will be hampered	-0.075	0.032	-0.065	-2.341	0.019	-0.139	-0.012			SEI9	Poor people will suffer food and nutritional deficiency	-0.08	0.054	-0.057	-1.492	0.136	-0.186	0.025		SEI9	Poor people will suffer food and nutritional deficiency	-0.025	0.069	-0.014	-0.368	0.713	-0.161	0.11		SEI9	Poor people will suffer food and nutritional deficiency	0.01	0.034	0.009	0.276	0.783	-0.058	0.077				SEI9	Poor people will suffer food and nutritional deficiency	-0.032	0.039	-0.028	-0.824	0.41
SEI11	There is a chance of social conflict due to this outbreak	0.048	0.026	0.051	1.834	0.067	-0.003	0.1			SEI10	The formal education system will be hampered	-0.014	0.038	-0.012	-0.353	0.724	-0.089	0.062		SEI10	The formal education system will be hampered	-0.054	0.049	-0.037	-1.096	0.273	-0.15	0.042		SEI10	The formal education system will be hampered	0.048	0.025	0.054	1.948	0.042	0	0.096				SEI10	The formal education system will be hampered	-0.025	0.028	-0.027	-0.906	0.365
IEI1	There is a chance of community transmission of COVID-19 in Bangladesh	0.104	0.036	0.084	2.889	0.004	0.033	0.175			SEI11	There is a chance of social conflict due to this outbreak	0.045	0.031	0.048	1.449	0.148	-0.016	0.106		SEI11	There is a chance of social conflict due to this outbreak	0.084	0.04	0.07	2.102	0.036	0.006	0.162		SEI11	There is a chance of social conflict due to this outbreak	0.026	0.02	0.036	1.296	0.195	-0.013	0.065				SEI11	There is a chance of social conflict due to this outbreak	0.077	0.023	0.101	3.428	0.001
IEI2	A huge number of people will be infected	0.117	0.033	0.107	3.504	0	0.052	0.183			IEI1	There is a chance of community transmission of COVID-19 in Bangladesh	0.118	0.043	0.095	2.748	0.006	0.034	0.202		IEI1	There is a chance of community transmission of COVID-19 in Bangladesh	0.005	0.055	0.003	0.091	0.928	-0.103	0.113		IEI1	There is a chance of community transmission of COVID-19 in Bangladesh	0.052	0.027	0.055	1.882	0.06	-0.002	0.106				IEI2	A huge number of people will be infected	0.246	0.028	0.279	8.772	0
IEI3	There is a chance of not detecting most of the infected patients due to lack of health facilities leads to undermining the actual infected case	0.025	0.042	0.019	0.6	0.548	-0.057	0.108			IEI2	A huge number of people will be infected	-0.075	0.04	-0.069	-1.879	0.06	-0.153	0.003		IEI2	A huge number of people will be infected	-0.032	0.051	-0.023	-0.631	0.528	-0.133	0.068		IEI2	A huge number of people will be infected	-0.025	0.026	-0.03	-0.994	0.321	-0.076	0.025				IEI3	There is a chance of not detecting most of the infected patients due to lack of health facilities leads to undermining the actual infected case	0.178	0.036	0.168	4.957	0
IEI4	There is a chance to increase in the number of death for not having proper health facilities	0.054	0.048	0.039	1.111	0.267	-0.041	0.149			IEI3	There is a chance of not detecting most of the infected patients due to lack of health facilities leads to undermining the actual infected case	0.036	0.05	0.028	0.725	0.469	-0.062	0.134		IEI3	There is a chance of not detecting most of the infected patients due to lack of health facilities leads to undermining the actual infected case	-0.081	0.064	-0.049	-1.266	0.206	-0.207	0.045		IEI3	There is a chance of not detecting most of the infected patients due to lack of health facilities leads to undermining the actual infected case	0.045	0.032	0.045	1.421	0.156	-0.017	0.108				IEI4	There is a chance to increase in the number of death for not having proper health facilities	0.074	0.042	0.067	1.783	0.075
IEI5	Lack of bio-medical waste management facilities in Bangladesh will create more problem	-0.05	0.045	-0.036	-1.13	0.259	-0.138	0.037			IEI4	There is a chance to increase in the number of death for not having proper health facilities	0.065	0.057	0.048	1.135	0.256	-0.048	0.178		IEI4	There is a chance to increase in the number of death for not having proper health facilities	-0.038	0.074	-0.022	-0.516	0.606	-0.182	0.106		IEI4	There is a chance to increase in the number of death for not having proper health facilities	-0.037	0.037	-0.035	-1.009	0.313	-0.109	0.035				IEI5	Lack of bio-medical waste management facilities in Bangladesh will create more problem	0.029	0.038	0.026	0.755	0.451
IEI6	There will be many people with psychosocially shocked due to this outbreak	0.027	0.035	0.021	0.762	0.446	-0.042	0.096			IEI5	Lack of bio-medical waste management facilities in Bangladesh will create more problem	0.019	0.053	0.013	0.35	0.726	-0.085	0.122		IEI5	Lack of bio-medical waste management facilities in Bangladesh will create more problem	0.054	0.068	0.031	0.797	0.426	-0.079	0.187		IEI5	Lack of bio-medical waste management facilities in Bangladesh will create more problem	-0.014	0.034	-0.013	-0.412	0.681	-0.08	0.052				IEI6	There will be many people with psychosocially shocked due to this outbreak	0.057	0.03	0.055	1.867	0.062
IEI7	The government will lose its trust to the people	-0.023	0.025	-0.025	-0.904	0.366	-0.072	0.026			IEI6	There will be many people with psychosocially shocked due to this outbreak	-0.044	0.042	-0.034	-1.044	0.297	-0.125	0.038		IEI6	There will be many people with psychosocially shocked due to this outbreak	-0.01	0.053	-0.006	-0.178	0.859	-0.114	0.095		IEI6	There will be many people with psychosocially shocked due to this outbreak	-0.045	0.027	-0.046	-1.68	0.093	-0.097	0.008				IEI7	The government will lose its trust to the people	0.01	0.022	0.013	0.442	0.658
EEI1	There is a chance of disaster like flood, cyclone, drought etc. in 2020 considering the climate change vulnerability of Bangladesh	-0.01	0.026	-0.01	-0.385	0.7	-0.061	0.041			IEI7	The government will lose its trust to the people	0.04	0.03	0.044	1.331	0.183	-0.019	0.098		IEI7	The government will lose its trust to the people	0.056	0.038	0.049	1.473	0.141	-0.019	0.131		IEI7	The government will lose its trust to the people	0.026	0.019	0.038	1.369	0.171	-0.011	0.063				EEI1	There is a chance of disaster like flood, cyclone, drought etc. in 2020 considering the climate change vulnerability of Bangladesh	0.031	0.022	0.039	1.399	0.162
EEI2	If any disaster (flood, cyclone etc.) occur after the COVID-19 situation then it will create a double burden to the country	0.059	0.045	0.039	1.305	0.192	-0.03	0.147			EEI1	There is a chance of disaster like flood, cyclone, drought etc. in 2020 considering the climate change vulnerability of Bangladesh	0.032	0.031	0.032	1.028	0.304	-0.029	0.092		EEI1	There is a chance of disaster like flood, cyclone, drought etc. in 2020 considering the climate change vulnerability of Bangladesh	-0.018	0.039	-0.014	-0.447	0.655	-0.095	0.06		EEI1	There is a chance of disaster like flood, cyclone, drought etc. in 2020 considering the climate change vulnerability of Bangladesh	0.008	0.02	0.011	0.424	0.672	-0.03	0.047				EEI2	If any disaster (flood, cyclone etc.) occur after the COVID-19 situation then it will create a double burden to the country	0.039	0.039	0.033	1.013	0.312
EEI3	There is a chance of severe food scarcity due to these events (COVID-19 + Disasters) in the country	0.022	0.035	0.019	0.636	0.525	-0.047	0.091			EEI2	If any disaster (flood, cyclone etc.) occur after the COVID-19 situation then it will create a double burden to the country	-0.047	0.053	-0.031	-0.875	0.382	-0.152	0.058		EEI2	If any disaster (flood, cyclone etc.) occur after the COVID-19 situation then it will create a double burden to the country	-0.013	0.068	-0.007	-0.183	0.855	-0.147	0.122		EEI2	If any disaster (flood, cyclone etc.) occur after the COVID-19 situation then it will create a double burden to the country	0.036	0.034	0.032	1.065	0.287	-0.031	0.104				EEI3	There is a chance of severe food scarcity due to these events (COVID-19 + Disasters) in the country	-0.013	0.03	-0.013	-0.425	0.671
EEI4	High possibility of huge economical loss	-0.007	0.054	-0.005	-0.13	0.897	-0.113	0.099			EEI3	There is a chance of severe food scarcity due to these events (COVID-19 + Disasters) in the country	-0.012	0.042	-0.01	-0.289	0.773	-0.094	0.07		EEI3	There is a chance of severe food scarcity due to these events (COVID-19 + Disasters) in the country	0.018	0.053	0.012	0.343	0.732	-0.086	0.123		EEI3	There is a chance of severe food scarcity due to these events (COVID-19 + Disasters) in the country	-0.033	0.027	-0.035	-1.221	0.222	-0.085	0.02				EEI4	High possibility of huge economical loss	0.005	0.046	0.004	0.108	0.914
EEI5	High possibility of increasing the poverty level	-0.064	0.046	-0.05	-1.402	0.161	-0.155	0.026			EEI4	High possibility of huge economical loss	0.106	0.064	0.069	1.659	0.097	-0.019	0.231		EEI4	High possibility of huge economical loss	0.036	0.082	0.019	0.443	0.658	-0.124	0.197		EEI4	High possibility of huge economical loss	0.057	0.041	0.048	1.386	0.166	-0.024	0.137				EEI5	High possibility of increasing the poverty level	-0.035	0.04	-0.033	-0.871	0.384
EEI6	High possibility of severe socio-economic and health crisis	-0.029	0.05	-0.021	-0.581	0.562	-0.126	0.069			EEI5	High possibility of increasing the poverty level	0.06	0.055	0.047	1.099	0.272	-0.047	0.167		EEI5	High possibility of increasing the poverty level	-0.019	0.07	-0.012	-0.277	0.782	-0.156	0.118		EEI5	High possibility of increasing the poverty level	-0.022	0.035	-0.023	-0.638	0.524	-0.091	0.046				EEI6	High possibility of severe socio-economic and health crisis	0.058	0.043	0.051	1.354	0.176
a Dependent Variable: I am most afraid of coronavirus recent outbreak in Bangladesh											EEI6	High possibility of severe socio-economic and health crisis	-0.014	0.059	-0.01	-0.239	0.811	-0.13	0.102		EEI6	High possibility of severe socio-economic and health crisis	-0.118	0.075	-0.067	-1.57	0.117	-0.266	0.03		EEI6	High possibility of severe socio-economic and health crisis	0.084	0.038	0.079	2.247	0.025	0.011	0.158				a Dependent Variable: There is a chance of community transmission of COVID-19 in Bangladesh
											a Dependent Variable: Health system of Bangladesh is fragile to deal with the recent outbreak of COVID-19										a Dependent Variable: Bangladesh government can deal with this outbreak										a Dependent Variable: Shut down or lockdown or social distancing will have an economic and social impact in future
[truncated: 11 more columns]

## Sheet: Table-S6_T test
	One-Sample Statistics
		N	Mean	Std. Deviation	Std. Error Mean			One-Sample Test
	I am most afraid of coronavirus recent outbreak in Bangladesh	1066	4.152	1.01231	0.03101				Test Value = 0
	I am afraid of getting coronavirus	1066	3.8386	1.08001	0.03308				t	df	Sig. (2-tailed)	Mean Difference	95% Confidence Interval of the Difference
	I am afraid of losing my life or my relatives' life due to this outbreak	1066	4.0854	1.08737	0.0333								Lower	Upper
	All the news and numbers of COVID-19 in different media increasing my tension	1066	4.0713	1.05108	0.03219			I am most afraid of coronavirus recent outbreak in Bangladesh	133.912	1065	0	4.15197	4.0911	4.2128
	It makes me uncomfortable to be detached from regular activities	1066	4.1951	1.05235	0.03223			I am afraid of getting coronavirus	116.045	1065	0	3.83865	3.7737	3.9036
	Health system of Bangladesh is fragile to deal with the recent outbreak of COVID-19	1066	4.3593	1.00953	0.03092			I am afraid of losing my life or my relatives' life due to this outbreak	122.668	1065	0	4.08537	4.02	4.1507
	A huge population is a pressure to the existing health system to deal with COVID-19	1066	4.515	0.87332	0.02675			All the news and numbers of COVID-19 in different media increasing my tension	126.466	1065	0	4.07129	4.0081	4.1345
	There is a lack of awareness of basic health issues in most of the citizens of Bangladesh	1066	4.5488	0.77639	0.02378			It makes me uncomfortable to be detached from regular activities	130.156	1065	0	4.19512	4.1319	4.2584
	There is a lack of trained doctors and health professional to deal with the COVID-19	1066	4.227	1.00844	0.03089			Health system of Bangladesh is fragile to deal with the recent outbreak of COVID-19	140.986	1065	0	4.35929	4.2986	4.42
	There is a lack of health facilities to combat the COVID-19 outbreak in Bangladesh	1066	4.6482	0.73356	0.02247			A huge population is a pressure to the existing health system to deal with COVID-19	168.797	1065	0	4.51501	4.4625	4.5675
	There is a lack of health infrastructure to deal with COVID-19	1066	4.606	0.77552	0.02375			There is a lack of awareness of basic health issues in most of the citizens of Bangladesh	191.29	1065	0	4.54878	4.5021	4.5954
	There is a severe lack of bio-medical waste management facilities in Bangladesh	1066	4.5694	0.73374	0.02247			There is a lack of trained doctors and health professional to deal with the COVID-19	136.855	1065	0	4.22702	4.1664	4.2876
	There is a lack of COVID-19 testing facility in Bangladesh	1066	4.7223	0.71458	0.02189			There is a lack of health facilities to combat the COVID-19 outbreak in Bangladesh	206.886	1065	0	4.64822	4.6041	4.6923
	There is a lack of budget or financial support to response to this outbreak	1066	4.0544	1.18553	0.03631			There is a lack of health infrastructure to deal with COVID-19	193.915	1065	0	4.606	4.5594	4.6526
	Most of the poor people will not have access to existing health facilities if they are infected by COVID-19	1066	4.6426	0.74103	0.0227			There is a severe lack of bio-medical waste management facilities in Bangladesh	203.329	1065	0	4.56942	4.5253	4.6135
	Bangladesh government can deal with this outbreak	1066	2.5056	1.28351	0.03931			There is a lack of COVID-19 testing facility in Bangladesh	215.768	1065	0	4.72233	4.6794	4.7653
	Government is taking this outbreak seriously to deal with	1066	2.7617	1.25727	0.03851			There is a lack of budget or financial support to response to this outbreak	111.659	1065	0	4.05441	3.9832	4.1257
	Government is taking proper decisions in the right time	1066	2.272	1.19038	0.03646			Most of the poor people will not have access to existing health facilities if they are infected by COVID-19	204.55	1065	0	4.64259	4.5981	4.6871
	Government is involving other sector actors to combat the COVID-19 outbreak	1066	2.9794	1.12819	0.03455			Bangladesh government can deal with this outbreak	63.738	1065	0	2.50563	2.4285	2.5828
	Government need support from the people to reduce the impact of COVID-19	1066	4.5657	0.77635	0.02378			Government is taking this outbreak seriously to deal with	71.718	1065	0	2.76173	2.6862	2.8373
	Government need to formulate a policy and action plan and implement it immediately	1066	4.6754	0.69044	0.02115			Government is taking proper decisions in the right time	62.318	1065	0	2.27205	2.2005	2.3436
	The developed nations are going to support Bangladesh in response to COVID-19	1066	3.4512	1.007	0.03084			Government is involving other sector actors to combat the COVID-19 outbreak	86.222	1065	0	2.97936	2.9116	3.0472
	Shut down or lockdown of regular activities is a good decision to reduce the chance of infection of COVID-19	1066	4.5338	0.77356	0.02369			Government need support from the people to reduce the impact of COVID-19	192.01	1065	0	4.56567	4.519	4.6123
	Shut down or lockdown or social distancing will have an economic and social impact in future	1066	4.5113	0.77421	0.02371			Government need to formulate a policy and action plan and implement it immediately	221.092	1065	0	4.67542	4.6339	4.7169
	The formal and informal business will be hampered	1066	4.5084	0.71891	0.02202			The developed nations are going to support Bangladesh in response to COVID-19	111.898	1065	0	3.45122	3.3907	3.5117
	Poor people living in hand to mouth will be severely affected	1066	4.788	0.60366	0.01849			Shut down or lockdown of regular activities is a good decision to reduce the chance of infection of COVID-19	191.358	1065	0	4.53377	4.4873	4.5803
	Most of the poor people living in urban areas have to leave due to not having any options for income	1066	4.4203	0.87518	0.02681			Shut down or lockdown or social distancing will have an economic and social impact in future	190.246	1065	0	4.51126	4.4647	4.5578
	Many people will lose their livelihood/ jobs at a time	1066	4.3621	0.85593	0.02622			The formal and informal business will be hampered	204.753	1065	0	4.50844	4.4652	4.5516
	There will be less supply of basic goods/ products for daily use	1066	4.1295	0.971	0.02974			Poor people living in hand to mouth will be severely affected	258.966	1065	0	4.78799	4.7517	4.8243
	Price of most of the basic products will be higher than usual	1066	4.2889	0.88652	0.02715			Most of the poor people living in urban areas have to leave due to not having any options for income	164.904	1065	0	4.42026	4.3677	4.4729
	Poor people will suffer food and nutritional deficiency	1066	4.6013	0.71178	0.0218			Many people will lose their livelihood/ jobs at a time	166.394	1065	0	4.3621	4.3107	4.4135
	The formal education system will be hampered	1066	4.379	0.87688	0.02686			There will be less supply of basic goods/ products for daily use	138.851	1065	0	4.12946	4.0711	4.1878
	There is a chance of social conflict due to this outbreak	1066	3.9024	1.0676	0.0327			Price of most of the basic products will be higher than usual	157.956	1065	0	4.28893	4.2357	4.3422
	There is a chance of community transmission of COVID-19 in Bangladesh	1066	4.3893	0.81732	0.02503			Poor people will suffer food and nutritional deficiency	211.065	1065	0	4.60131	4.5585	4.6441
	A huge number of people will be infected	1066	4.2083	0.92628	0.02837			The formal education system will be hampered	163.048	1065	0	4.37899	4.3263	4.4317
	There is a chance of not detecting most of the infected patients due to lack of health facilities leads to undermining the actual infected case	1066	4.5572	0.76852	0.02354			There is a chance of social conflict due to this outbreak	119.346	1065	0	3.90244	3.8383	3.9666
	There is a chance to increase in the number of death for not having proper health facilities	1066	4.5629	0.73561	0.02253			There is a chance of community transmission of COVID-19 in Bangladesh	175.34	1065	0	4.38931	4.3402	4.4384
	Lack of bio-medical waste management facilities in Bangladesh will create more problem	1066	4.5066	0.72801	0.0223			A huge number of people will be infected	148.333	1065	0	4.20826	4.1526	4.2639
	There will be many people with psychosocially shocked due to this outbreak	1066	4.2842	0.79957	0.02449			There is a chance of not detecting most of the infected patients due to lack of health facilities leads to undermining the actual infected case	193.609	1065	0	4.55722	4.511	4.6034
	The government will lose its trust to the people	1066	3.8293	1.1179	0.03424			There is a chance to increase in the number of death for not having proper health facilities	202.521	1065	0	4.56285	4.5186	4.6071
	There is a chance of disaster like flood, cyclone, drought etc. in 2020 considering the climate change vulnerability of Bangladesh	1066	3.6979	1.00363	0.03074			Lack of bio-medical waste management facilities in Bangladesh will create more problem	202.109	1065	0	4.50657	4.4628	4.5503
	If any disaster (flood, cyclone etc.) occur after the COVID-19 situation then it will create a double burden to the country	1066	4.6501	0.67586	0.0207			There will be many people with psychosocially shocked due to this outbreak	174.942	1065	0	4.28424	4.2362	4.3323
	There is a chance of severe food scarcity due to these events (COVID-19 + Disasters) in the country	1066	4.3002	0.84027	0.02574			The government will lose its trust to the people	111.839	1065	0	3.82927	3.7621	3.8965
	High possibility of huge economical loss	1066	4.5901	0.66138	0.02026			There is a chance of disaster like flood, cyclone, drought etc. in 2020 considering the climate change vulnerability of Bangladesh	120.3	1065	0	3.69794	3.6376	3.7583
	High possibility of increasing the poverty level	1066	4.4306	0.78325	0.02399			If any disaster (flood, cyclone etc.) occur after the COVID-19 situation then it will create a double burden to the country	224.637	1065	0	4.65009	4.6095	4.6907
	High possibility of severe socio-economic and health crisis	1066	4.485	0.72271	0.02214			There is a chance of severe food scarcity due to these events (COVID-19 + Disasters) in the country	167.09	1065	0	4.30019	4.2497	4.3507
								High possibility of huge economical loss	226.593	1065	0	4.59006	4.5503	4.6298
								High possibility of increasing the poverty level	184.687	1065	0	4.43058	4.3835	4.4777
								High possibility of severe socio-economic and health crisis	202.617	1065	0	4.48499	4.4416	4.5284

## Sheet: Table-S7_ANOVA
		ANOVA
				Sum of Squares	df	Mean Square	F	Sig.
		I am afraid of getting coronavirus	Between Groups	426.839	4	106.71	138.85	0
			Within Groups	815.408	1061	0.769
			Total	1242.25	1065
		I am afraid of losing my life or my relatives' life due to this outbreak	Between Groups	335.462	4	83.866	96.324	0
			Within Groups	923.77	1061	0.871
			Total	1259.23	1065
		All the news and numbers of COVID-19 in different media increasing my tension	Between Groups	224.255	4	56.064	62.461	0
			Within Groups	952.327	1061	0.898
			Total	1176.58	1065
		It makes me uncomfortable to be detached from regular activities	Between Groups	78.287	4	19.572	18.859	0
			Within Groups	1101.13	1061	1.038
			Total	1179.41	1065
		Health system of Bangladesh is fragile to deal with the recent outbreak of COVID-19	Between Groups	53.874	4	13.469	13.854	0
			Within Groups	1031.52	1061	0.972
			Total	1085.39	1065
		A huge population is a pressure to the existing health system to deal with COVID-19	Between Groups	31.029	4	7.757	10.535	0
			Within Groups	781.231	1061	0.736
			Total	812.26	1065
		There is a lack of awareness of basic health issues in most of the citizens of Bangladesh	Between Groups	31.378	4	7.844	13.631	0
			Within Groups	610.586	1061	0.575
			Total	641.963	1065
		There is a lack of trained doctors and health professional to deal with the COVID-19	Between Groups	22.433	4	5.608	5.61	0
			Within Groups	1060.63	1061	1
			Total	1083.06	1065
		There is a lack of health facilities to combat the COVID-19 outbreak in Bangladesh	Between Groups	28.712	4	7.178	13.99	0
			Within Groups	544.37	1061	0.513
			Total	573.082	1065
		There is a lack of health infrastructure to deal with COVID-19	Between Groups	32.281	4	8.07	14.077	0
			Within Groups	608.241	1061	0.573
			Total	640.522	1065
		There is a severe lack of bio-medical waste management facilities in Bangladesh	Between Groups	24.055	4	6.014	11.616	0
			Within Groups	549.308	1061	0.518
			Total	573.363	1065
		There is a lack of COVID-19 testing facility in Bangladesh	Between Groups	27.118	4	6.78	13.921	0
			Within Groups	516.691	1061	0.487
			Total	543.809	1065
		There is a lack of budget or financial support to response to this outbreak	Between Groups	18.067	4	4.517	3.241	0.012
			Within Groups	1478.78	1061	1.394
			Total	1496.84	1065
		Most of the poor people will not have access to existing health facilities if they are infected by COVID-19	Between Groups	20.525	4	5.131	9.648	0
			Within Groups	564.302	1061	0.532
			Total	584.826	1065
		Bangladesh government can deal with this outbreak	Between Groups	17.266	4	4.317	2.636	0.033
			Within Groups	1737.2	1061	1.637
			Total	1754.47	1065
		Government is taking this outbreak seriously to deal with	Between Groups	23.201	4	5.8	3.707	0.005
			Within Groups	1660.28	1061	1.565
			Total	1683.48	1065
		Government is taking proper decisions in the right time	Between Groups	20.671	4	5.168	3.684	0.005
			Within Groups	1488.44	1061	1.403
			Total	1509.11	1065
		Government is involving other sector actors to combat the COVID-19 outbreak	Between Groups	13.912	4	3.478	2.75	0.027
			Within Groups	1341.63	1061	1.264
			Total	1355.55	1065
		Government need support from the people to reduce the impact of COVID-19	Between Groups	24.222	4	6.055	10.401	0
			Within Groups	617.682	1061	0.582
			Total	641.903	1065
		Government need to formulate a policy and action plan and implement it immediately	Between Groups	20.287	4	5.072	11.04	0
			Within Groups	487.409	1061	0.459
			Total	507.696	1065
		The developed nations are going to support Bangladesh in response to COVID-19	Between Groups	26.919	4	6.73	6.781	0
			Within Groups	1053.04	1061	0.993
			Total	1079.96	1065
		Shut down or lockdown of regular activities is a good decision to reduce the chance of infection of COVID-19	Between Groups	18.797	4	4.699	8.062	0
			Within Groups	618.487	1061	0.583
			Total	637.284	1065
		Shut down or lockdown or social distancing will have an economic and social impact in future	Between Groups	9.488	4	2.372	4.002	0.003
			Within Groups	628.877	1061	0.593
			Total	638.365	1065
		The formal and informal business will be hampered	Between Groups	8.488	4	2.122	4.154	0.002
			Within Groups	541.936	1061	0.511
			Total	550.424	1065
		Poor people living in hand to mouth will be severely affected	Between Groups	11.52	4	2.88	8.115	0
			Within Groups	376.566	1061	0.355
			Total	388.086	1065
		Most of the poor people living in urban areas have to leave due to not having any options for income	Between Groups	5.203	4	1.301	1.703	0.147
			Within Groups	810.519	1061	0.764
			Total	815.722	1065
		Many people will lose their livelihood/ jobs at a time	Between Groups	12.407	4	3.102	4.286	0.002
			Within Groups	767.822	1061	0.724
			Total	780.229	1065
		There will be less supply of basic goods/ products for daily use	Between Groups	6.2	4	1.55	1.648	0.16
			Within Groups	997.935	1061	0.941
			Total	1004.13	1065
		Price of most of the basic products will be higher than usual	Between Groups	6.419	4	1.605	2.05	0.085
			Within Groups	830.591	1061	0.783
			Total	837.009	1065
		Poor people will suffer food and nutritional deficiency	Between Groups	4.438	4	1.11	2.2	0.067
			Within Groups	535.12	1061	0.504
			Total	539.558	1065
		The formal education system will be hampered	Between Groups	4.784	4	1.196	1.559	0.183
			Within Groups	814.105	1061	0.767
			Total	818.889	1065
		There is a chance of social conflict due to this outbreak	Between Groups	26.567	4	6.642	5.935	0
			Within Groups	1187.29	1061	1.119
			Total	1213.85	1065
		There is a chance of community transmission of COVID-19 in Bangladesh	Between Groups	72.409	4	18.102	30.056	0
			Within Groups	639.029	1061	0.602
			Total	711.438	1065
		A huge number of people will be infected	Between Groups	123.939	4	30.985	41.623	0
			Within Groups	789.829	1061	0.744
			Total	913.767	1065
		There is a chance of not detecting most of the infected patients due to lack of health facilities leads to undermining the actual infected case	Between Groups	44.391	4	11.098	20.141	0
			Within Groups	584.618	1061	0.551
			Total	629.009	1065
		There is a chance to increase in the number of death for not having proper health facilities	Between Groups	52.705	4	13.176	26.701	0
			Within Groups	523.584	1061	0.493
			Total	576.289	1065
		Lack of bio-medical waste management facilities in Bangladesh will create more problem	Between Groups	45.302	4	11.325	23.146	0
			Within Groups	519.152	1061	0.489
			Total	564.454	1065
		There will be many people with psychosocially shocked due to this outbreak	Between Groups	30.632	4	7.658	12.496	0
			Within Groups	650.243	1061	0.613
			Total	680.875	1065
		The government will lose its trust to the people	Between Groups	36.002	4	9	7.374	0
			Within Groups	1294.92	1061	1.22
			Total	1330.93	1065
		There is a chance of disaster like flood, cyclone, drought etc. in 2020 considering the climate change vulnerability of Bangladesh	Between Groups	26.948	4	6.737	6.835	0
			Within Groups	1045.79	1061	0.986
			Total	1072.73	1065
		If any disaster (flood, cyclone etc.) occur after the COVID-19 situation then it will create a double burden to the country	Between Groups	22.335	4	5.584	12.764	0
			Within Groups	464.15	1061	0.437
			Total	486.485	1065
		There is a chance of severe food scarcity due to these events (COVID-19 + Disasters) in the country	Between Groups	21.31	4	5.327	7.736	0
			Within Groups	730.63	1061	0.689
			Total	751.94	1065
		High possibility of huge economical loss	Between Groups	11.308	4	2.827	6.599	0
			Within Groups	454.546	1061	0.428
			Total	465.855	1065
		High possibility of increasing the poverty level	Between Groups	13.028	4	3.257	5.396	0
			Within Groups	640.335	1061	0.604
			Total	653.363	1065
		High possibility of severe socio-economic and health crisis	Between Groups	14.805	4	3.701	7.253	0
			Within Groups	541.455	1061	0.51
			Total	556.26	1065

## Sheet: Raw Data
Timestamp	Occupation	Institute	Location	Gender	I am most afraid of coronavirus recent outbreak in Bangladesh	I am afraid of getting coronavirus	I am afraid of losing my life or my relatives life due to this outbreak	All the news and numbers of COVID-19 in different media increasing my tension	It makes me uncomfortable to be detached from regular activities	Health system of Bangladesh is fragile to deal with the recent outbreak of COVID-19	Huge population is a pressure to the existing health system to deal with COVID-19	There is a lack of awareness of basic health issues in most of the citizens of Bangladesh	There is a lack of trained doctors and health professional to deal with the COVID-19	There is lack of health facilities to combat the COVID-19 outbreak in Bangladesh	There is lack of health infrastructure to deal with COVID-19	There is a severe lack of bio-medical waste management facilities in Bangladesh	There is a lack of COVID-19 testing facility in Bangladesh	There is lack of budget or financial support to response to this outbreak	Most of the poor people will not have access to existing health facilities if they are infected by COVID-19	Bangladesh government has the capacity to deal with this outbreak	Government is taking this outbreak seriously to deal with the impact of COVID-19 outbreak	Government is taking proper decisions in right time	Government is involving other sector actors to combat the COVID-19 outbreak	Government need support from the people to reduce the impact of COVID-19	Government need to formulate a policy and action plan and implement it immediately	The developed nations are going to support Bangladesh in response to COVID-19	Shut down or lock down of regular activities is a good decision to reduce the chance of infection of COVID-19	Shut down or lock down or social distancing will have an economic and social impacts in future	Formal and informal business will be hampered	Poor people living in hand to mouth will be severely affected	Most of the poor people living in urban areas has to leave due to not having any options for income	Many people will lose their livelihood/ jobs at a time	There will be less supply of basic goods/ products for daily use	Price of most of the basic products will be higher than usual	Poor people will suffer food and nutritional deficiency	Formal education system will be hampered	There is a chance of social conflict due to this outbreak	There is a chance of community transmission of COVID-19 in Bangladesh	Huge number of people will be infected	There is a chance of not detecting most of the infected patients due to lack of health facilities leads to undermine the actual infected case	There is a chance to increase in number of death for not having proper health facilities	Lack of bio-medical waste management facilities in Bangladesh will create more problem	There will be many people with psychosocially shocked due to this outbreak	Government will lose its trust to the people	There is a chance of disaster like flood, cyclone, drought etc. in 2020 considering the climate change vulnerability of Bangladesh	If any disaster (flood, cyclone etc.) occur after the COVID-19 situation then it will create double burden to the country	There is a chance of severe food scarcity due to these events (COVID-19 + Disasters) in the country	High possibility of huge economical loss	High possibility of increasing the poverty level
					MH1	MH2	MH3	MH4	MH5	HSB1	HSB2	HSB3	HSB4	HSB5	HSB6	HSB7	HSB8	HSB9	HSB10	GPI1	GPI2	GPI3	GPI4	GPI5	GPI6	GPI7	SEI1	SEI2	SEI3	SEI4	SEI5	SEI6	SEI7	SEI8	SEI9	SEI10	SEI11	IEI1	IEI2	IEI3	IEI4	IEI5	IEI6	IEI7	EEI1	EEI2	EEI3	EEI4	EEI5
2020-03-28 22:48:24	Teacher	Jahangirnagar University	Dhaka	Male	5	5	4	5	5	5	5	5	5	5	5	5	5	4	5	1	3	2	1	5	5	5	5	5	5	5	5	5	5	5	5	5	4	5	5	5	5	5	5	5	5	5	4	5	5
2020-03-28 22:57:15	Student	Jahangirnagar University	Jamalpur	Female	4	4	5	5	5	5	5	5	5	5	5	5	5	5	5	1	1	1	1	5	5	3	5	3	3	5	5	5	5	5	5	5	4	5	5	5	5	5	4	5	3	5	5	5	5
2020-03-28 22:59:41	student	stamford university bangladesh,siddheshwari campus	malibagh,dhaka	Female	4	5	5	3	4	5	4	5	4	5	5	5	5	5	5	4	1	1	3	4	5	4	4	4	4	5	5	5	5	5	4	4	4	5	5	5	5	5	5	5	4	5	4	5	5
2020-03-28 23:07:36	Student	Rangpur Medical College	Rangpur	Male	3	2	4	4	5	4	4	3	3	3	3	3	3	3	3	3	3	3	3	3	3	3	3	3	3	3	3	3	3	3	3	3	3	3	3	3	3	3	3	3	3	3	3	3	3
2020-03-28 23:07:54	Student	Community Based Medical College Bangladesh	Mymensing, Dhaka, Bangladesh	Male	5	5	5	5	5	3	3	5	1	5	5	5	1	5	5	5	1	5	1	1	5	5	5	5	5	5	5	5	1	1	1	5	5	5	5	5	5	5	5	5	5	5	5	5	5
2020-03-28 23:08:43	Student	University of Dhaka	Dhaka	Female	4	5	3	5	4	4	4	5	4	4	4	4	4	4	4	3	4	3	3	5	4	3	5	3	4	4	4	4	4	4	4	3	4	4	4	4	4	4	4	3	3	3	3	4	4
2020-03-28 23:09:20	Development worker	BRAC	Dhaka	Male	4	4	4	4	5	5	4	4	5	5	5	5	5	4	5	2	3	2	4	5	4	3	5	5	5	5	5	5	4	4	5	5	5	4	3	4	4	4	4	3	4	4	3	4	4
2020-03-28 23:09:47	Studentship	Jahangirnagar University	Dhanmondi, Dhaka - 1205	Male	2	4	4	2	5	5	5	5	5	5	5	5	5	5	5	1	1	1	2	4	5	3	5	5	5	5	5	5	5	5	5	5	5	5	5	5	5	5	5	5	3	5	5	5	5
2020-03-28 23:11:02	Student	Bangabandhu Sheikh Mujibur Rahman agricultural University	Gazipur	Male	5	4	4	5	5	4	5	3	2	4	4	3	4	4	4	2	4	3	3	5	5	3	4	5	5	5	4	5	5	4	4	5	3	4	4	3	4	4	4	3	3	5	5	5	5
2020-03-28 23:11:33	student	Govt.Ashek Mahmud College	Jamalpur	Male	5	5	5	5	5	1	5	5	5	5	5	5	5	5	5	1	3	3	5	5	5	5	5	5	5	5	5	5	5	3	5	5	5	5	5	5	5	5	5	5	5	5	5	5	5
2020-03-28 23:17:53	student	Jahangirnagar University	Dhaka	Male	5	5	5	5	5	5	4	5	3	5	5	5	5	5	4	2	2	2	2	4	4	4	5	4	4	4	4	4	5	5	5	4	4	4	5	5	5	4	4	3	3	4	4	4	4
2020-03-28 23:19:11	Student	Jahangirnagar University	Savar, Dhaka	Male	1	1	2	3	5	2	5	4	4	4	4	5	5	5	5	5	5	5	5	4	4	4	5	5	5	5	5	5	4	5	5	5	5	4	4	4	4	4	4	4	5	4	4	5	5
2020-03-28 23:20:12	Student	University if Dhaka	Bashundhara residential area	Male	3	4	4	2	4	5	5	4	4	5	5	5	5	5	5	2	3	1	3	4	5	4	5	5	5	5	5	3	5	4	4	5	3	3	3	4	5	5	4	5	3	5	5	5	5
2020-03-28 23:20:21	Student	University of Dhaka	Uttara,Dhaka	Female	4	2	4	4	5	4	5	3	4	4	4	3	4	3	4	3	4	3	4	5	4	3	5	4	4	4	4	4	3	3	4	3	3	4	3	5	4	4	3	3	3	5	3	4	4
2020-03-28 23:21:48	doctor	upazilla family planning office, sreebardi, sherpur	sherpur	Female	5	4	5	5	4	4	5	5	5	5	5	4	5	5	5	1	4	4	5	5	5	4	5	3	3	5	5	5	4	5	5	4	3	5	5	5	5	5	4	4	5	5	5	4	4
2020-03-28 23:22:06	Student	Bangladesh University of Professionals	Dhaka	Male	3	3	2	4	3	5	5	5	4	5	5	5	5	4	5	5	3	1	2	5	5	3	5	5	5	5	5	4	5	5	5	3	3	4	2	5	3	5	5	5	5	5	5	5	5
2020-03-28 23:23:24	Student	Bangladesh University of professionals	Dhaka	Female	4	4	5	5	5	4	5	5	5	5	5	5	5	3	5	3	3	2	4	5	4	3	5	4	4	5	4	5	4	5	5	5	4	4	5	5	5	4	5	4	4	5	4	5	5
2020-03-28 23:23:51	Student	Ahsanullah University of Science & Technology	Dhaka	Male	5	5	5	4	5	5	5	3	4	5	5	5	5	4	5	2	2	2	2	5	5	5	5	5	5	4	5	5	4	4	5	4	2	5	4	5	5	4	4	3	5	5	5	5	4
2020-03-28 23:23:58	Student	Bangladesh University of Professionals	Mirpur	Female	5	5	5	4	4	5	5	5	5	5	5	5	5	1	5	3	1	1	3	5	5	3	5	5	5	5	5	5	3	4	5	3	3	5	4	5	5	5	4	3	3	5	4	5	5
2020-03-28 23:24:00	Student	Jahangirnagar University	Dhaka	Male	3	4	5	3	2	5	5	5	4	5	5	5	5	3	5	2	1	3	3	5	4	3	4	5	5	5	5	4	3	4	4	5	5	5	5	5	5	5	5	5	5	5	5	5	5
2020-03-28 23:24:45	Student	BUP	Mirpur 12	Male	3	3	3	3	5	3	3	4	4	5	5	5	5	4	4	1	1	1	2	5	4	3	4	4	4	5	1	2	5	5	5	5	5	5	5	5	5	5	4	3	5	5	5	5	5
2020-03-28 23:25:42	Student	Jahangirnagar University	Magura	Female	4	4	5	4	3	5	5	5	3	5	5	5	5	5	5	3	3	1	4	5	5	3	4	5	5	5	5	5	5	5	5	5	4	5	5	5	5	5	5	3	3	5	5	5	5
2020-03-28 23:26:09	Student	Jahangirnagar University	Kashinathpu, panbna,Bangladesh	Male	5	5	5	4	5	4	5	5	5	5	5	5	5	5	5	1	4	4	5	5	5	4	5	4	5	5	5	5	5	5	5	5	5	5	5	5	5	5	5	5	3	5	5	4	4
2020-03-28 23:26:12	Student	University of Dhaka	Shahbagh, Dhaka	Male	3	3	3	3	5	5	5	5	5	5	5	4	5	5	5	2	2	2	3	5	5	3	4	5	5	5	3	5	5	2	5	5	3	5	5	5	5	5	5	3	5	5	5	5	3
2020-03-28 23:26:45	student	JU	Dhaka	Female	4	3	4	4	3	5	5	5	5	5	5	5	5	5	5	1	1	1	3	4	5	3	4	5	4	5	4	4	4	5	4	4	4	4	4	4	4	4	4	3	4	4	4	4	5
2020-03-28 23:27:59	ছাত্র	স্নাতক পাশ	ঢাকা	Male	1	5	5	5	5	5	5	5	4	5	5	5	5	3	5	1	3	1	2	5	5	1	5	5	5	5	5	5	5	5	5	5	5	5	3	5	5	5	5	5	3	5	5	5	5
2020-03-28 23:28:27	Banker	The City Bank Ltd	Paltan, Dhaka	Female	5	5	5	3	5	5	5	5	5	5	5	5	5	5	5	1	2	3	3	5	5	5	5	5	5	5	5	5	5	3	5	5	5	5	5	5	5	5	5	3	5	5	5	5	5
2020-03-28 23:28:55	Student	Bangladesh University of Professionals	Mirpur DOHS	Male	3	3	2	5	5	5	5	5	3	5	5	5	5	5	5	3	3	2	3	5	5	3	5	5	5	5	5	5	5	5	5	5	3	5	5	5	5	5	5	5	4	5	5	5	5
2020-03-28 23:29:17	Student	IUT	Dhaka	Male	4	4	5	3	2	5	4	4	5	4	4	4	5	3	3	4	3	3	3	4	4	4	4	4	4	4	4	4	3	3	5	4	4	4	4	4	4	4	4	4	4	4	4	3	4
2020-03-28 23:31:02	Student	Jahangirnagar University	Chittagong	Female	5	4	4	5	5	5	5	5	5	5	5	5	5	5	5	2	3	3	2	5	5	3	5	4	5	5	5	5	5	5	5	5	5	5	4	5	5	5	5	5	4	5	5	5	5
2020-03-28 23:31:23	Student	Bangladesh University of Professionals	Dhanmondi, Dhaka	Female	2	2	5	2	2	4	4	4	4	4	4	5	4	4	4	1	2	2	3	5	5	3	4	4	4	5	5	4	4	4	4	4	3	4	4	3	4	4	2	5	3	4	4	4	4
2020-03-28 23:32:03	Student	Bangladesh University of Professionals	Mirpur	Female	5	4	4	5	3	5	5	4	5	5	5	4	5	5	5	4	4	2	3	5	5	4	4	5	4	5	4	4	3	5	5	3	5	5	4	5	4	4	3	2	3	4	4	5	5
2020-03-28 23:32:24	Student	Bangladesh University of professionals	Chittagong	Female	5	4	4	5	3	5	5	5	2	5	5	5	5	5	5	1	2	3	2	4	5	3	5	5	5	5	5	4	5	5	5	4	4	5	5	5	4	5	4	4	4	5	5	5	5
2020-03-28 23:33:40	Student	Bangladesh University of Professionals	Dhaka Cantonment	Male	5	5	5	4	5	3	5	2	4	5	5	3	5	1	3	2	5	3	3	5	5	3	5	5	4	5	4	4	3	4	5	5	4	3	4	5	5	3	5	3	2	5	4	4	5
2020-03-28 23:34:40	Student	BUET	Dhaka	Female	4	3	5	4	5	5	5	5	5	5	5	5	5	4	5	4	1	1	3	5	5	4	5	4	4	5	4	5	4	5	5	5	4	5	5	5	5	5	5	5	5	5	5	5	5
2020-03-28 23:35:13	Student	Daffodil international University	Dhanmondi	Male	4	3	4	4	2	5	4	4	3	5	5	4	5	5	5	2	3	3	4	5	5	4	3	4	4	4	4	4	5	4	5	3	5	4	4	5	4	4	4	5	4	5	4	4	4
2020-03-28 23:35:47	Intellectual Business	Undefined	Rangpur, Bangladesh	Male	5	5	5	5	1	5	5	5	5	5	5	5	5	5	5	1	1	1	3	5	5	2	5	4	4	5	4	5	5	5	5	5	4	5	5	5	5	5	5	5	1	5	5	5	5
2020-03-28 23:35:48	Student	BUET		Female	5	5	5	5	3	5	5	5	5	5	5	5	5	2	5	2	3	2	4	4	4	4	4	4	4	5	4	4	4	4	4	4	4	5	5	5	5	5	5	4	4	4	4	4	4
2020-03-28 23:37:07	Student	Bangladesh University of Professionals	Khillgoan, Dhaka	Female	4	4	5	5	4	5	5	4	5	5	5	5	4	5	5	2	2	2	3	5	5	2	5	4	5	5	5	5	5	5	5	5	3	4	5	5	5	5	5	4	5	5	5	5	5
2020-03-28 23:37:39	Student	Jahangirnagar University	Tangail	Female	4	3	5	5	5	5	5	4	4	5	5	5	5	5	5	3	3	3	3	5	5	3	5	5	5	5	5	5	3	2	5	5	5	2	2	3	3	4	5	3	3	5	5	5	5
2020-03-28 23:39:00	Student	Jahangirnagar University	Dhaka	Female	4	5	5	4	5	2	5	5	3	5	5	5	5	5	5	3	4	3	3	5	5	2	5	5	5	5	5	5	5	4	5	5	5	5	5	5	5	5	4	4	4	5	5	5	5
2020-03-28 23:40:45	Engineer	RUET	Narsingdi	Male	1	1	2	2	5	5	5	1	5	5	3	4	5	2	5	2	4	3	4	5	5	2	4	5	5	5	5	4	5	5	5	5	2	3	2	5	5	4	5	3	5	5	4	4	4
2020-03-28 23:40:55	Bank job	Janata Bank Limited	Panchbibi branch, Joypurhat	Male	3	3	1	3	4	5	5	4	5	5	5	5	5	4	5	3	5	4	4	5	5	3	5	4	4	5	5	4	5	5	3	5	1	5	5	5	5	5	5	3	5	5	5	5	5
2020-03-28 23:41:52	Student	UIU	Dhaka	Male	5	5	5	5	5	5	5	5	1	5	5	5	5	5	5	5	4	2	4	5	5	5	4	5	5	5	5	5	5	5	5	5	5	5	5	5	5	5	5	4	3	5	5	5	5
2020-03-28 23:42:01	Student	UIU	Dhaka	Male	5	5	5	5	5	5	5	5	1	5	5	5	5	5	5	5	4	2	4	5	5	5	4	5	5	5	5	5	5	5	5	5	5	5	5	5	5	5	5	4	3	5	5	5	5
2020-03-28 23:43:06	Student	BUP	DHAKA	Female	4	3	4	4	5	5	5	5	4	5	5	5	5	5	5	5	1	1	2	3	5	3	5	4	4	5	5	5	5	5	5	4	5	5	5	5	5	5	5	5	4	5	5	5	5
2020-03-28 23:43:57	Job holder	Jahangirnagar University	Savar	Male	4	4	3	5	4	5	4	3	3	5	4	3	4	2	5	2	2	2	3	3	4	5	5	5	4	5	4	5	4	5	4	5	4	5	4	4	4	4	5	5	5	5	4	5	5
2020-03-28 23:45:11	Chef		Dhaka,Bangladesh	Male	4	5	5	5	4	4	5	4	3	4	4	4	4	4	5	3	4	2	3	5	5	4	4	4	4	5	4	5	4	4	5	4	5	5	4	4	4	5	5	3	4	5	4	5	4
2020-03-28 23:45:55	Pharmacist	Asia pacific University	Banasree, Dhaka	Male	4	5	5	4	5	2	3	5	4	4	5	5	5	2	4	4	3	3	4	5	4	3	5	5	5	5	4	3	5	5	5	5	5	3	5	4	4	4	4	3	1	5	4	5	5
2020-03-28 23:46:21	Student	BUP	Mirpur	Female	5	5	5	4	5	5	5	5	4	5	5	5	5	3	4	3	3	2	2	5	5	3	4	5	5	5	5	5	4	4	5	5	5	5	5	5	4	5	4	4	5	5	5	5	5
2020-03-28 23:47:02	Business	Al-Amin jewellers	Mohadevpur,Naogaon	Male	4	4	4	4	4	4	4	5	5	5	5	4	5	4	4	2	4	4	2	5	5	2	4	5	5	5	2	2	4	4	4	4	3	4	3	4	4	4	3	3	3	5	3	4	4
2020-03-28 23:47:38	Student	AITVET	Dhanmondi	Male	5	5	5	3	4	5	5	5	4	5	4	4	5	5	4	2	2	2	3	3	5	4	4	4	4	5	5	5	5	5	5	4	4	5	5	5	5	5	4	4	3	5	5	4	5
2020-03-28 23:49:08	Student	Jahangirnagar University	Savar, Dhaka	Male	5	5	5	4	5	5	5	4	5	5	5	5	5	4	5	2	3	1	4	4	5	2	5	5	5	5	5	4	4	5	4	5	5	5	5	5	5	5	5	5	3	5	5	5	5
2020-03-28 23:52:09	Teacher	University of Dhaka	Dhaka	Male	2	2	2	3	5	5	5	5	5	5	5	5	5	5	5	3	3	3	3	5	5	5	5	5	5	5	3	3	2	4	5	5	5	3	3	5	5	5	5	3	3	5	5	5	5
2020-03-28 23:53:54	Student	Bangladesh university of professionals	Dhaka	Male	5	5	5	5	5	5	5	5	5	5	5	5	5	5	5	1	1	1	1	5	5	5	5	3	3	3	3	5	3	3	5	3	3	5	3	3	4	3	3	3	5	4	4	3	3
2020-03-28 23:54:30	Student	Mawlana Bhasani Science and Technology University, Santosh, Tangail	Magura	Female	3	2	4	3	4	4	4	4	4	4	4	4	4	4	4	3	3	3	3	4	4	3	5	4	4	4	4	3	4	4	4	4	3	4	4	3	4	4	4	3	3	4	3	4	4
2020-03-28 23:54:59	Student	East West University	Aftabnagar	Female	5	5	5	5	3	3	5	4	4	5	5	4	5	5	3	2	3	4	4	5	5	3	5	5	4	4	3	5	4	5	4	2	3	3	4	4	5	5	5	3	3	5	5	5	4
2020-03-28 23:55:39	student	bangladesh university of professionals	mirpur cantonment, Dhaka-1216	Female	5	5	5	5	4	5	5	5	5	5	5	5	5	5	5	3	4	3	5	5	5	3	5	4	5	5	5	5	5	5	5	5	5	5	4	4	5	5	5	4	4	5	5	5	5
2020-03-28 23:56:46	Student	JahangirNagarUniversity	Jahangirnagar	Female	4	2	4	4	4	4	2	4	2	4	4	4	4	4	4	2	2	2	2	4	2	4	4	4	4	4	4	2	2	4	4	4	4	5	5	5	4	4	4	4	4	4	4	4	2
2020-03-28 23:56:50	Private job	DEPZ	Savar Dhaka	Male	5	5	5	5	5	5	5	5	5	5	5	5	5	5	5	1	5	1	2	5	5	5	5	5	5	5	5	5	5	5	5	5	5	5	5	5	5	5	5	5	5	5	5	5	5
2020-03-28 23:58:03	Student	AFMI	Dhaka	Female	5	5	5	5	5	5	5	5	5	5	5	5	5	5	5	3	5	1	4	5	5	4	5	5	5	5	5	5	5	5	5	5	5	5	5	5	5	5	5	5	5	5	5	5	5
2020-03-28 23:59:09	Teacher	Sonargaon University	Dhaka	Male	4	3	4	3	4	4	5	4	4	5	5	5	5	4	5	3	3	2	3	4	5	3	4	5	5	5	5	5	4	4	4	3	3	4	4	5	5	4	4	3	3	5	5	5	4
2020-03-29 00:02:09	student	Jahangirnagar University	Tangail	Female	4	5	5	5	5	5	5	5	5	5	5	5	5	5	5	4	3	2	3	5	5	3	5	4	5	5	5	5	4	5	5	5	4	5	5	5	5	4	4	5	4	5	4	4	4
2020-03-29 00:02:14	Student	Jahangirnagar University	Kallyanpur	Female	5	4	5	5	3	5	5	5	2	5	5	3	5	5	5	2	4	2	4	5	4	3	5	5	5	5	3	5	5	5	5	4	4	5	5	5	5	3	4	4	4	4	5	5	5
2020-03-29 00:02:44	student	Ju	Savar	Male	2	2	4	3	5	5	5	5	5	5	5	5	5	5	5	1	2	1	3	5	5	5	4	4	4	5	5	4	4	4	4	5	3	5	4	5	5	5	5	4	4	5	4	4	4
2020-03-29 00:03:25	Student	University of Dhaka		Male	5	5	5	5	4	5	5	5	4	4	4	4	5	4	5	2	3	3	3	5	4	4	4	4	4	5	5	4	5	5	5	4	4	4	4	4	4	4	4	3	3	5	4	5	5
2020-03-29 00:03:56	Journalist	BD NEWS	Dhaka	Female	5	5	5	5	4	3	3	3	4	4	4	4	4	4	3	3	4	4	4	4	3	3	4	5	5	5	5	4	4	4	4	5	3	5	4	3	4	5	4	4	4	5	4	4	4
2020-03-29 00:04:05	student	BUP	mirpur, dhaka	Female	5	3	4	3	4	5	5	5	4	5	5	5	5	5	5	1	1	1	2	3	5	4	5	5	5	5	5	5	4	4	5	5	4	5	5	5	5	5	4	5	4	5	5	5	4
2020-03-29 00:04:07	Unemployed	RUET	Dhaka	Male	5	3	4	5	3	5	5	4	4	5	5	5	5	5	5	3	4	3	3	5	5	4	4	5	5	5	5	5	5	5	5	5	5	5	5	5	5	5	5	3	5	5	5	5	5
2020-03-29 00:04:32	Student	Khulna University	Madaripur	Female	4	3	3	5	2	5	5	5	5	5	5	5	5	2	5	4	3	1	3	5	5	1	5	5	5	5	5	5	5	5	5	5	5	3	3	5	3	5	5	5	1	5	4	5	5
2020-03-29 00:05:01	Service	Trust Bank Ltd	Chittagong	Male	4	2	2	4	4	5	5	5	5	5	5	5	5	5	5	1	3	2	3	5	5	2	4	5	5	5	4	4	4	5	5	5	4	4	5	5	5	5	4	2	3	5	5	5	5
2020-03-29 00:06:06	Student	International Relations, Jahangirnagar University	Savar	Male	4	3	4	3	4	5	5	5	5	5	5	5	5	4	5	3	2	1	1	5	5	4	4	5	5	5	5	4	4	5	5	5	3	4	4	4	5	5	5	4	4	4	5	5	2
2020-03-29 00:06:17	Engineer	Walton Hi-Tech Industries Limited	Gazipur	Male	3	4	3	3	3	4	4	4	2	4	4	4	4	3	4	3	4	3	4	4	4	4	4	4	4	4	4	4	3	3	4	3	2	4	4	4	4	4	4	3	4	4	4	4	4
2020-03-29 00:07:56	Student	Bangladesh University of Professionals	Dhaka	Female	5	4	5	4	3	5	5	5	3	5	5	5	5	5	5	1	1	1	2	5	5	5	5	5	5	5	4	5	5	5	5	5	4	5	5	5	5	5	5	5	5	5	5	5	5
2020-03-29 00:10:09	Student	Bangladesh University of Professionals	Rampura	Female	5	5	5	4	5	5	1	5	2	5	5	5	5	4	5	2	3	2	2	5	5	4	5	5	5	5	5	5	3	4	5	5	3	5	5	5	5	5	5	4	5	5	5	5	5
2020-03-29 00:11:34	Student	College	Dhaka,Dhanmondi,Kolabagan	Male	5	5	5	3	4	4	5	5	4	5	5	5	5	4	4	2	4	2	3	5	4	3	4	4	4	4	4	4	4	3	4	4	4	3	4	4	4	4	3	3	4	3	4	4	4
2020-03-29 00:11:50	Student	Mohammadpur Model School And College	27th north dhanmondi, kolabagan, tetultola maath	Male	5	1	3	5	5	5	5	5	5	5	5	5	5	5	5	5	1	1	1	5	5	3	5	4	5	5	5	3	4	4	5	4	4	4	5	4	5	5	5	5	2	5	3	5	4
2020-03-29 00:16:16	Student	Daffodil international University	Dhanmondi	Male	4	3	5	1	5	5	5	5	5	5	5	5	5	1	5	4	2	1	3	5	5	3	5	5	5	5	5	5	5	5	5	3	4	4	4	5	5	5	3	4	5	5	5	5	5
2020-03-29 00:17:01	Student	Department of environmental sciences	Jahangirnagar University	Male	4	1	1	4	4	4	4	4	4	4	4	4	5	4	5	2	3	2	3	4	4	4	4	4	4	4	4	4	4	4	4	4	3	4	2	4	4	4	4	2	2	4	4	4	4
2020-03-29 00:19:25	Private Service	A&E Bangladesh Ltd	Gulsan ,dhaka	Male	5	5	5	5	4	5	5	5	5	5	5	5	5	5	5	1	3	3	1	5	4	3	5	5	5	4	4	4	4	4	4	4	4	5	5	5	5	5	4	4	3	5	4	5	4
2020-03-29 00:19:51	Teaching	Jashore University of Science and Technology	Jashore	Male	5	1	1	5	5	5	5	5	5	5	5	5	5	5	5	1	2	2	1	5	5	3	4	5	5	5	5	5	5	5	5	5	5	5	5	5	5	5	5	5	4	5	5	5	5
2020-03-29 00:21:34	Student	BUP	ECB CHOTTOR	Female	4	4	5	3	5	5	5	3	2	3	5	3	4	2	5	2	3	1	3	5	5	3	5	5	5	5	5	5	5	5	4	5	5	5	3	2	5	5	5	2	5	3	5	5	5
2020-03-29 00:23:10	Student		Khulna	Female	3	3	2	4	5	2	4	4	1	5	5	3	5	5	5	2	2	1	2	4	5	4	4	5	5	5	4	4	5	4	5	5	5	5	4	3	4	3	4	4	4	5	4	5	5
2020-03-29 00:27:23	Teacher	Jahangirnagar University	Savar, Dhaka	Female	5	5	5	5	5	5	5	5	5	5	5	4	5	3	5	1	3	2	4	5	5	5	5	5	5	5	5	5	5	5	5	5	5	5	5	5	5	5	5	5	1	5	5	5	5
2020-03-29 00:28:05	Intern	Bangladesh medical college and hospital	Dhanmondi 14/A	Female	4	4	3	2	5	4	4	4	4	4	4	4	4	4	4	2	2	2	3	4	4	3	4	4	4	5	4	4	4	4	4	4	4	4	4	4	4	4	4	4	3	4	4	4	4
2020-03-29 00:28:13	Intern	Bangladesh medical college and hospital	Dhanmondi 14/A	Female	4	4	3	2	5	4	4	4	4	4	4	4	4	4	4	2	2	2	3	4	4	3	4	4	4	5	4	4	4	4	4	4	4	4	4	4	4	4	4	4	3	4	4	4	4
2020-03-29 00:28:31	Student	Jahangirnagar University	Dhaka	Male	5	5	5	5	5	5	5	5	5	5	5	5	5	1	5	1	1	1	1	5	5	3	5	5	5	5	5	5	5	5	5	5	5	5	5	5	5	5	5	5	3	5	5	5	5
2020-03-29 00:32:46	student	Green University	Dhaka	Male	5	5	5	4	5	4	5	4	4	5	4	5	5	5	5	2	3	2	3	4	5	3	4	5	5	5	4	4	5	5	5	5	4	4	4	5	5	4	3	4	4	5	4	5	5
2020-03-29 00:28:34	Undergrad Student	North South University	Bashundhara, Dhaka	Female	4	4	5	4	3	5	5	5	4	5	5	5	5	3	5	3	2	1	3	4	5	3	4	5	5	5	5	5	5	5	5	4	4	5	5	5	5	5	5	5	5	5	5	5	5
2020-03-29 00:30:12	Student	Jahangirnagar university	Savar	Male	5	5	5	5	5	5	5	5	5	5	5	5	5	4	5	1	1	1	3	4	5	2	4	3	4	4	4	4	4	4	4	4	4	4	4	5	4	5	4	4	4	3	3	4	4
2020-03-29 00:30:37	Student	Holy Cross College	Dhanmondi	Female	3	1	3	1	1	1	5	1	3	3	3	3	5	1	3	5	5	5	5	5	5	5	5	3	3	3	3	3	3	3	3	1	1	3	3	3	3	3	5	3	1	5	3	3	3
2020-03-29 00:34:05	Teaching	Jahangirnagar University	Dhaka	Female	5	5	5	5	5	5	5	5	4	5	5	5	5	5	5	1	1	1	1	5	4	3	4	5	5	5	5	5	5	5	5	5	5	5	5	5	5	5	5	4	4	5	5	5	5
2020-03-29 00:35:16	Student	University of Dhaka	Green Rd	Female	4	4	5	4	2	5	4	5	5	5	5	5	5	4	5	2	2	2	1	5	5	3	5	5	5	5	5	5	4	5	5	4	4	5	5	5	5	5	4	5	5	5	5	5	5
2020-03-29 00:39:35	Student	Jahangirnagar University	Savar	Male	2	2	3	2	5	5	3	4	4	5	5	5	5	2	3	1	4	1	3	5	5	3	5	5	5	5	4	4	4	5	4	5	3	4	3	5	5	4	4	5	3	4	4	4	4
2020-03-29 00:40:39	student	Jahangirnagar University	Mirpur	Male	5	4	4	4	5	5	5	4	5	5	5	5	5	4	5	2	3	3	3	5	5	3	4	4	5	5	5	4	4	4	5	4	4	5	4	5	5	4	4	5	4	5	5	5	5
2020-03-29 00:41:04	Student	Military Institute of Science & Technology	Dhaka	Male	3	5	5	5	5	4	5	5	1	5	5	5	5	5	5	5	5	3	5	5	5	5	5	5	5	5	5	5	5	5	5	5	3	5	4	4	4	4	5	5	5	4	4	4	5
2020-03-29 00:41:21	Govt Job ( RTD )	Government of Bangladesh	Dhaka	Male	4	3	3	5	4	5	5	2	2	5	4	5	5	5	5	3	5	3	5	5	4	3	5	5	5	4	4	5	4	4	4	5	3	5	5	5	4	4	4	3	2	3	4	4	3
2020-03-29 00:41:32	Student		Dhaka	Female	4	5	3	2	2	5	4	5	5	5	5	3	5	5	5	1	2	1	3	4	5	2	5	5	4	5	4	4	5	5	5	5	3	5	5	5	5	4	4	5	5	4	4	4	4
2020-03-29 00:42:38	student	Mawlana bhashani science and technology university		Male	4	5	3	3	3	5	5	4	5	5	5	4	5	5	5	2	2	1	1	3	5	3	4	4	4	5	4	4	4	3	5	4	4	5	5	5	5	4	4	4	3	5	5	5	4
2020-03-29 00:44:27	student	Mawlana bhashani science and technology university	tangail	Female	4	4	5	4	4	5	5	5	3	5	4	5	5	4	3	3	2	2	3	4	4	4	4	4	4	5	4	5	4	3	5	3	4	5	5	5	5	5	5	4	4	5	4	4	4
2020-03-29 00:45:12	Student	MBSTU	Tangail	Female	4	4	5	4	5	5	5	5	3	5	4	5	5	1	4	5	2	1	2	4	5	3	5	5	5	5	5	4	4	5	5	3	3	5	4	5	4	4	5	4	5	5	3	4	3
2020-03-29 00:47:15	Student	Bnmpc	Dhaka	Female	2	3	3	3	2	4	4	5	3	4	4	3	3	4	3	4	4	2	4	5	5	3	4	4	4	4	3	3	4	5	4	3	3	4	3	3	3	4	4	3	4	4	4	4	3
2020-03-29 00:47:38	student	Jahangirnagar University	savar	Male	5	5	5	5	5	5	5	5	4	4	5	5	1	5	1	1	5	1	1	1	1	5	2	5	5	5	1	5	5	5	5	5	5	5	5	5	1	1	5	5	5	5	5	5	5
2020-03-29 00:50:07	Student	Military Institute of Science & Technology	Khulna	Male	4	4	4	4	2	5	5	4	4	5	5	5	5	5	5	2	3	2	3	5	5	4	5	5	5	5	5	4	5	4	5	2	2	4	4	5	5	5	5	5	3	5	3	4	4
2020-03-29 00:50:16	Teaching	Jahangirnagar University	Savar	Male	4	4	4	4	4	5	5	5	5	5	5	5	5	5	5	1	1	1	1	5	5	1	5	5	5	5	5	5	5	5	5	5	5	4	4	5	5	5	5	5	4	5	5	5	5
2020-03-29 00:50:34	Student	Jahangirnagar University	Dhaka	Male	5	5	5	5	5	5	5	5	5	5	5	5	5	5	5	1	3	3	3	5	5	3	5	5	5	5	5	4	1	3	5	5	5	5	5	3	5	4	4	3	3	5	5	4	5
2020-03-29 00:52:32	Engineer	Devsbox	Dhanmondi	Male	4	3	3	4	4	4	4	5	5	5	5	4	5	5	5	2	4	2	3	5	5	3	4	5	4	4	4	4	5	4	4	3	3	5	4	5	5	4	3	5	4	5	4	5	4
2020-03-29 00:53:17	Teacher	Jahangirnagar University	Savar, Dhaka	Male	5	5	5	5	5	5	5	5	4	5	5	5	5	5	5	4	4	2	1	5	5	1	5	5	5	5	4	4	5	5	5	5	2	5	4	5	5	5	5	5	5	4	4	5	4
2020-03-29 00:54:26	Homemaker	Home	Bogura	Female	5	5	5	5	5	5	5	5	5	5	5	5	5	5	5	1	3	4	4	4	5	3	5	5	5	5	5	5	5	5	5	4	5	5	5	5	5	5	5	5	3	5	5	5	5
2020-03-29 00:59:07	Student	Daffodil International University	Sirajganj	Male	4	3	2	4	1	4	4	5	4	5	5	5	5	5	4	2	4	4	2	5	5	4	5	4	5	5	5	5	4	4	5	4	2	5	4	5	5	5	5	4	2	4	4	5	3
2020-03-29 00:58:01	Service	M/o of planning	Dhaka	Female	5	5	5	5	5	5	4	4	3	5	4	4	4	4	5	3	3	4	3	4	5	5	5	5	4	5	4	4	4	4	4	5	4	5	5	4	5	4	4	3	4	5	3	4	4
2020-03-29 00:59:25	NGO worker	BRAC	Dhaka	Male	5	5	5	5	4	5	5	4	5	5	5	5	5	5	5	1	3	2	4	5	5	2	5	4	4	5	4	4	4	5	5	5	4	5	4	5	4	4	5	5	5	5	5	5	5
2020-03-29 00:59:41	Doctor	Sir Salimullah Medical College,Dhaka	Mitford,Dhaka	Male	3	3	5	2	3	5	1	5	1	5	5	5	5	1	3	5	1	1	1	3	5	3	5	3	3	3	4	4	4	4	4	4	3	3	3	4	4	4	4	4	3	3	3	3	3
2020-03-29 01:00:02	Student	University of Dhaka	Nilkhet Rd, Dhaka 1000	Female	5	4	4	5	5	5	5	4	3	4	4	4	4	4	5	1	3	3	3	5	5	3	5	3	4	5	5	5	5	3	4	4	4	3	5	5	5	5	5	4	4	5	4	4	4
2020-03-29 01:00:50	Engineer Joarder Tabedun Nabi	PWD	Dhaka	Male	3	2	1	2	5	4	5	5	3	5	3	5	5	5	5	2	2	3	4	5	5	1	5	5	5	5	5	5	2	5	5	5	5	2	1	5	5	5	5	3	5	5	5	5	5
2020-03-29 01:02:47	Banker	The City Bank Ltd	Paltan, Dhaka	Female	5	5	5	3	5	5	5	5	5	5	5	5	5	5	5	1	2	3	3	5	5	5	5	5	5	5	5	5	5	3	5	5	5	5	5	5	5	5	5	3	5	5	5	5	5
2020-03-29 01:05:57	Student	Bup	Dhaka	Male	5	5	5	5	5	5	5	5	5	5	5	5	5	5	5	5	5	5	5	5	5	5	5	5	5	5	5	5	5	5	4	4	4	5	5	5	4	5	4	4	5	5	5	5	5
2020-03-29 01:07:03	Service	Upazila Land Office	Jhenaidah	Male	5	5	5	5	5	5	5	5	5	5	3	3	5	5	5	5	5	5	5	5	5	5	5	5	5	5	5	5	5	5	5	5	5	5	5	5	5	5	5	5	5	3	5	5	5
2020-03-29 01:11:15	Student	Military Institute of Science & Technology	Rampura, Dhaka	Male	5	4	4	5	3	5	5	4	5	5	5	5	5	5	4	2	2	1	2	5	5	3	5	5	5	5	2	4	4	5	5	5	5	5	5	5	5	5	3	5	3	5	5	5	5
2020-03-29 01:11:17	University Lecturer	Mawlana Bhashani Science and Technology University	Tangail	Male	4	3	3	3	4	4	5	4	5	4	4	4	5	2	4	3	3	4	4	5	5	3	5	3	4	5	5	5	4	4	5	5	3	5	5	5	5	5	5	5	2	4	3	4	4
2020-03-29 01:11:44	Student	JahangirnagarUniversity		Male	5	5	5	5	5	3	4	4	4	5	4	5	5	5	5	2	5	5	5	5	5	5	5	5	5	5	5	5	4	5	5	5	5	4	4	4	3	4	4	5	5	5	4	5	5
2020-03-29 01:14:05	lecturer	BRAC University	Mohakhali	Female	5	4	4	3	5	4	5	4	5	4	5	5	5	3	4	2	3	4	3	5	4	3	5	5	4	4	4	5	2	5	4	4	3	5	4	5	5	4	4	4	2	4	4	5	4
2020-03-29 01:14:40	Student	Mist	Dhaka	Male	5	5	4	3	5	5	5	5	3	5	5	5	5	3	5	1	1	1	1	5	5	2	5	5	5	5	5	4	3	5	5	4	5	5	5	5	5	5	5	5	5	5	5	5	5
2020-03-29 01:14:55	Student	Mist	Savar	Male	3	4	5	4	5	4	5	4	3	5	5	5	5	5	5	1	2	3	3	5	5	5	5	5	5	5	5	5	5	4	5	5	5	3	4	5	5	5	5	5	3	5	5	5	5
2020-03-29 01:15:25	Student	SZMC	Bogura	Female	4	4	4	4	3	4	4	4	3	5	4	4	5	5	4	3	4	4	3	4	4	4	4	3	3	4	4	4	4	4	3	3	3	5	4	3	4	4	4	3	3	4	4	4	4
2020-03-29 01:17:21	Unemployed			Male	4	4	3	4	3	5	5	5	3	4	3	3	4	4	5	2	3	1	3	5	5	3	5	5	5	5	3	4	3	4	5	3	1	3	4	5	3	4	3	3	3	3	3	4	4
2020-03-29 01:19:34	Doctor	Xiamen University	Gazipur	Male	4	4	4	5	1	5	5	5	1	5	3	5	5	5	5	1	1	1	3	5	5	3	5	3	4	5	5	4	5	5	5	5	5	5	5	5	5	5	5	5	4	5	5	5	3
2020-03-29 01:19:36	Student	University of REGINA	Canada	Male	4	3	5	4	4	4	4	5	4	4	4	4	5	5	5	2	3	3	4	5	5	4	5	4	5	5	5	5	4	4	5	5	4	4	4	4	5	4	3	4	4	4	5	5	5
2020-03-29 01:20:20	Doctor	Bangladesh Specialized Hospital	Dhaka	Male	5	5	3	5	5	5	5	5	4	5	4	4	4	5	5	4	4	2	3	5	5	4	5	5	5	5	3	4	4	5	5	4	3	5	4	5	3	3	5	4	3	4	3	3	3
2020-03-29 01:20:45	student	dhaka university	dhaka	Male	5	5	5	5	5	5	5	5	5	5	5	5	5	3	5	1	1	1	1	4	5	2	5	1	1	2	2	2	3	1	3	1	1	5	5	5	5	5	3	5	5	5	5	3	3
2020-03-29 01:21:01	Student			Female	4	4	5	4	5	5	5	5	3	4	4	4	4	5	4	2	4	3	3	5	5	3	4	5	5	5	4	5	5	4	5	5	4	5	4	5	4	4	5	3	3	5	4	5	5
2020-03-29 01:21:35	Student	Military Institute of Science and Technology	Mirpur, Dhaka	Male	3	5	4	2	5	5	5	5	4	4	5	4	5	5	5	2	1	2	2	5	5	4	5	5	5	5	3	4	4	4	4	4	4	5	5	5	5	5	4	4	4	5	5	5	5
2020-03-29 01:23:35	Student	Faridpur Engineering College	Baitul Aman,Faridpur.	Male	4	3	4	5	5	5	5	5	4	5	5	5	4	4	5	1	1	2	2	5	5	2	2	5	3	5	5	4	4	5	5	5	5	4	3	4	3	5	4	5	4	5	4	5	5
2020-03-29 01:24:55	Graduate	MIST	Dhaka	Male	4	4	4	4	5	5	5	5	4	5	5	5	5	5	5	2	1	1	2	5	5	3	5	5	5	5	4	4	5	5	5	4	5	5	5	5	5	5	4	4	3	5	4	5	5
2020-03-29 01:25:54	জাহিদ হাসান শেখ	জাহাঙ্গীরনগর বিশ্ববিদ্যালয়	কাপাসিয়া, গাজীপুর	Male	4	4	4	5	4	5	4	4	4	4	5	3	5	4	3	1	3	2	3	5	5	3	3	5	4	5	5	4	4	4	4	5	3	4	3	3	4	4	4	4	5	5	2	4	5
2020-03-29 01:29:30	বিশ্ববিদ্যালয় শিক্ষক	জাহাঙ্গীরনগর বিশ্ববিদ্যালয়	ঢাকা	Male	3	3	2	2	4	5	5	5	5	5	5	5	5	4	5	2	3	2	1	5	5	3	5	5	5	5	3	4	4	4	4	5	5	5	5	5	5	5	4	5	3	5	4	4	4
2020-03-29 01:29:33	Student	AIUB	Uttara,Dhaka	Female	3	2	4	4	3	5	5	5	5	5	5	5	5	5	5	3	4	2	2	5	5	3	4	5	5	5	5	5	5	5	5	5	3	4	4	5	5	5	5	5	5	5	5	5	5
2020-03-29 01:30:56	Student	Faridpur Engineering College	Mymensingh	Male	5	3	3	3	3	3	3	3	3	3	3	3	3	3	3	3	3	3	3	3	3	3	3	3	3	3	2	3	3	3	3	3	3	3	3	3	3	3	3	3	3	3	3	3	3
2020-03-29 01:31:00	Student	FEC	Sunamganj	Male	1	1	1	2	4	4	5	4	4	4	3	2	2	2	5	3	4	2	4	5	5	4	5	5	4	5	5	4	4	4	5	4	4	4	4	5	4	4	4	3	4	5	4	5	5
2020-03-29 01:33:32	Student	Military Institute of Science and Technology	Mirpur DOHS	Male	5	3	4	5	5	4	5	5	5	5	5	4	5	3	4	3	2	1	2	5	5	5	5	5	5	5	5	5	2	4	5	5	5	5	5	5	5	5	5	5	4	5	4	5	5
2020-03-29 01:46:53	Student	Dhaka University -technology unit	Tangail	Male	5	3	4	5	5	5	5	5	4	5	5	4	5	4	5	1	1	1	3	5	5	5	5	5	5	5	5	5	4	5	4	5	4	5	4	5	5	5	5	4	3	5	5	5	5
2020-03-29 01:51:19	Case Coordinator	SCM Insurance service	Canada	Female	5	5	5	3	5	4	5	5	5	5	5	5	5	4	5	2	3	3	3	5	4	3	4	5	5	5	5	4	3	3	5	5	4	3	5	5	5	4	4	4	3	5	4	5	5
2020-03-29 01:53:57	Lecturer	State University of Bangladesh	dhaka	Male	5	5	5	5	3	4	5	5	4	5	5	5	5	4	5	2	1	1	3	3	5	4	4	2	3	5	4	3	4	4	4	4	2	4	4	5	4	5	4	1	3	5	4	3	3
2020-03-29 01:58:57	Business	Kiddie rocks	Dhanmondi 9/A	Female	5	5	5	5	4	4	4	5	5	4	4	5	5	5	5	2	3	2	3	5	5	3	4	5	5	5	5	5	4	4	5	4	4	4	4	5	5	4	4	5	4	5	5	5	5
2020-03-29 02:04:14	Doctor	Rangpur medical college hospital	Rangpur	Male	5	3	3	3	3	5	5	5	5	5	5	5	5	5	5	1	1	1	5	5	5	1	5	5	5	5	3	3	5	5	5	5	5	5	5	5	5	5	5	5	5	5	5	5	5
2020-03-29 02:09:49	Student	Eastern University	Dhanmondi	Male	3	3	3	3	3	4	5	3	3	3	3	3	3	5	5	2	4	3	3	5	5	2	5	3	3	5	5	5	5	5	5	5	4	5	5	5	5	5	5	5	3	5	5	5	5
2020-03-29 02:11:02	Retail Employee	Woolworths Limited	Sydney	Female	5	5	5	5	3	5	5	5	5	5	5	5	5	5	5	1	1	1	1	5	5	3	5	3	5	5	5	5	5	5	5	3	1	5	5	5	5	5	5	5	5	5	5	5	5
2020-03-29 02:12:08	Service	Southtech	Uttara	Female	3	4	4	1	1	5	3	2	5	5	5	3	5	2	5	2	4	3	5	5	5	1	5	4	4	4	4	5	5	5	3	4	3	5	5	5	5	3	2	2	2	4	4	4	4
2020-03-29 02:15:03	Private Employee	Irving Group	Banani	Male	5	4	3	5	4	5	5	5	5	5	5	5	5	5	5	1	3	3	1	5	5	4	5	4	4	5	4	4	3	5	5	4	4	4	5	5	5	5	3	5	4	5	5	5	5
2020-03-29 02:20:42	Job	Inivos Corporation	Mirpur	Male	3	3	4	4	5	4	5	5	3	5	4	3	4	5	4	1	2	3	3	4	5	5	5	5	5	5	5	4	3	4	5	3	1	5	5	3	4	4	5	3	5	5	4	5	5
2020-03-29 02:27:08	student	East West University	jamalpur	Male	5	5	5	4	3	1	4	3	3	3	5	3	5	5	5	2	2	1	3	4	5	3	4	5	5	5	5	5	5	5	5	4	5	5	5	5	5	5	5	5	3	5	5	5	5
2020-03-29 02:27:17	student	East West University	jamalpur	Male	5	5	5	4	3	1	4	3	3	3	5	3	5	5	5	2	2	1	3	4	5	3	4	5	5	5	5	5	5	5	5	4	5	5	5	5	5	5	5	5	3	5	5	5	5
2020-03-29 02:27:20	student	East West University	jamalpur	Male	5	5	5	4	3	1	4	3	3	3	5	3	5	5	5	2	2	1	3	4	5	3	4	5	5	5	5	5	5	5	5	4	5	5	5	5	5	5	5	5	3	5	5	5	5
2020-03-29 02:30:46	student	jahaghirnagar University	Savar, Dhaka.	Female	2	3	4	5	5	5	5	5	5	5	5	5	5	5	5	1	3	3	4	5	5	3	3	3	4	5	5	4	5	5	5	5	5	4	3	4	4	4	4	4	4	5	5	5	5
2020-03-29 02:32:31	Student	Hajee Mohammad Danesh Science and Technology University (HSTU), Dinajpur	Dinajpur	Male	5	4	4	4	4	5	3	4	4	5	5	5	5	3	4	1	2	2	3	5	4	3	4	5	5	5	5	5	5	5	5	5	4	5	5	3	5	5	5	5	3	5	5	5	2
2020-03-29 02:35:39	Student	Bangladesh University of professionals	Dhaka	Male	5	4	5	5	5	5	5	4	5	5	5	5	4	5	4	1	2	1	5	5	5	1	5	5	5	5	5	5	5	5	5	5	5	5	5	5	5	5	5	5	5	5	5	5	5
2020-03-29 02:36:44	private service	bKash	Mohakhali,Dhaka.	Male	3	4	5	4	3	5	5	4	3	5	5	5	5	3	5	2	2	3	2	5	5	2	3	4	5	5	1	3	2	4	5	3	4	5	4	5	5	5	5	5	4	5	3	3	4
2020-03-29 03:06:59	Student	Military Instituteof Science and technology	Dhaka	Female	5	5	5	5	5	5	5	5	5	5	5	5	5	5	5	5	1	1	1	5	5	5	5	5	5	5	5	5	5	5	5	5	5	5	5	5	5	5	5	5	5	5	5	5	5
2020-03-29 03:12:55	Student	Brac University	Mohakhali	Male	3	3	4	4	5	1	4	5	5	5	5	5	5	5	5	1	2	1	2	5	5	3	5	5	5	5	5	5	4	5	5	5	3	5	5	5	4	5	5	3	3	5	5	5	5
2020-03-29 03:13:08	Study	JahangirnagarUniversity	savar	Male	1	1	3	2	5	5	5	5	5	5	5	5	5	5	5	1	3	3	3	5	5	4	4	5	5	5	5	5	4	4	5	5	4	4	4	5	5	4	5	4	3	5	4	5	4
2020-03-29 03:27:19	Student	Mist	Farazipara,khulna.	Male	4	4	4	4	4	3	5	4	3	4	4	4	5	3	4	4	3	4	4	4	5	4	5	5	4	4	4	4	4	3	4	2	4	4	4	4	4	4	4	3	4	4	4	4	4
2020-03-29 03:29:47	Student	Jahangirnagar University	Savar Cantonment	Female	5	5	5	5	4	5	2	5	3	5	5	4	5	2	5	4	1	1	1	4	5	3	5	5	5	5	5	5	4	4	5	5	5	5	5	5	5	5	4	5	3	5	4	5	5
2020-03-29 03:39:59	Student	MIST	Puran Dhaka	Male	2	3	5	1	1	5	5	5	5	5	5	5	5	1	5	5	1	1	2	5	5	3	3	5	5	5	5	5	5	5	5	2	3	5	5	5	5	5	5	5	3	5	5	5	5
2020-03-29 04:12:30	Unoccupied	MIST	Mirpur	Male	5	4	4	4	5	5	5	5	5	5	5	5	5	5	5	2	2	2	3	5	5	4	5	5	5	5	5	5	5	5	5	5	5	5	4	5	5	5	5	5	5	5	5	5	5
2020-03-29 04:16:39	Researcher	The National University of Malaysia	Malaysia	Male	5	3	3	4	4	5	5	4	3	5	5	5	5	5	3	5	2	2	3	5	5	5	5	5	5	5	5	3	5	5	5	4	4	3	3	3	3	5	5	5	3	5	5	5	5
2020-03-29 04:23:45	Student	Jahangirnagar University	Chapai Nawabganj	Female	5	5	4	4	5	5	5	5	5	5	5	5	5	5	5	1	2	1	3	5	4	3	5	5	4	5	4	4	4	4	4	4	3	5	5	5	5	5	5	5	4	5	5	5	5
2020-03-29 05:17:50	student	Geography and Environment, Jahangirnagar University	Savar, Dhaka	Female	5	4	4	4	3	4	5	5	5	5	5	4	5	4	5	2	2	1	3	4	4	4	5	5	5	5	5	5	5	5	5	5	5	4	5	5	5	5	5	5	5	5	4	5	5
2020-03-29 05:29:01	Student	Shahjalal University of Science & Technology	Dhaka	Male	5	3	5	5	5	5	5	5	4	5	5	5	5	4	5	2	2	2	3	5	5	3	5	5	5	5	5	5	5	5	5	5	5	5	4	5	5	5	5	5	3	5	5	5	5
2020-03-29 06:15:51	Student	MIST	Dhaka	Female	5	3	3	5	5	5	5	3	4	5	5	5	5	5	5	1	2	1	3	4	5	3	4	4	4	5	4	5	3	5	5	3	3	5	4	5	5	5	5	5	4	5	5	5	5
2020-03-29 06:22:42	Teaching	Jahangirnagar University	Dhaka	Male	5	5	4	5	4	5	5	5	5	5	5	5	5	5	5	1	1	2	4	5	3	3	3	5	5	5	4	5	2	5	2	3	5	5	5	5	5	5	4	5	4	5	4	5	4
2020-03-29 06:38:23	Student	Jahangirnagar University	Dhaka	Male	4	3	3	5	5	4	5	5	2	3	2	3	5	1	5	3	4	3	1	4	5	4	5	5	4	5	5	3	4	4	5	4	3	4	3	4	3	4	4	3	4	5	3	4	4
2020-03-29 06:40:09	Student	Bangladesh University of Professionals	Narshindi	Female	4	4	5	5	5	5	5	5	4	5	3	3	5	3	4	3	2	1	3	4	5	3	5	5	4	5	5	4	4	5	5	5	5	4	5	5	5	4	4	4	3	5	2	4	4
2020-03-29 07:50:43	Executive Engineer	Renata Ltd.	Mirpur, Section 7, Dhaka-1216	Male	5	4	5	5	5	5	5	5	5	5	5	5	5	5	5	1	1	1	1	5	5	3	5	5	5	5	3	4	4	4	5	5	5	5	5	5	5	5	5	5	5	5	5	5	5
2020-03-29 07:54:27	Private service	Bank Asia Limited	Uttara, Dhaka	Female	5	4	4	3	4	5	2	4	5	5	5	5	5	5	5	1	2	1	3	4	5	4	4	5	4	5	5	5	2	4	5	4	4	5	5	5	5	4	5	4	3	5	2	5	5
2020-03-29 08:33:49	Student	Southeast University	Mirpur 12 dhaka	Female	5	4	5	4	3	5	4	5	3	5	5	5	5	4	5	1	1	1	1	4	4	3	4	5	5	4	5	5	5	4	5	5	5	4	3	5	5	3	4	5	4	5	5	5	5
2020-03-29 08:42:59	Teacher	Instituteof Marine Technology Chandpur	Chandpur	Male	5	5	5	4	5	5	5	3	5	5	5	5	5	5	5	1	1	2	4	1	1	4	1	1	1	1	1	1	1	1	1	1	1	5	5	5	5	5	5	5	5	5	5	5	5
2020-03-29 08:49:01	Student	Jahangirnagar University	Savar	Female	4	4	4	4	5	5	5	4	2	2	4	4	5	5	5	4	4	4	4	5	4	2	4	4	4	5	4	4	4	4	4	4	3	5	5	5	4	4	5	4	4	5	5	5	5
2020-03-29 08:50:49	Student	United International University	Dhaka, Bangladesh	Female	3	4	4	3	4	4	5	5	4	4	5	5	5	4	3	3	3	2	4	5	5	3	5	5	4	5	4	4	5	4	4	4	4	4	3	4	4	3	3	4	3	5	5	5	4
2020-03-29 08:51:31	Doctor	Sir Salimullah Medical College, Dhaka	Dhaka	Male	3	3	3	3	5	4	5	4	1	5	5	5	5	5	5	1	3	1	3	5	5	4	5	5	5	5	5	5	5	5	5	5	5	5	5	5	5	5	5	5	2	5	5	5	5
2020-03-29 08:51:46	Student	Jahangirnagar University	Savar	Male	1	4	4	4	4	5	4	5	5	5	5	5	5	5	5	1	4	2	4	5	5	4	5	4	5	5	3	3	4	4	5	5	4	5	5	5	5	5	5	4	5	5	5	5	5
2020-03-29 08:53:25	Teacher	Daffodil International University	Dhaka, Bangladesh	Male	5	5	5	5	5	4	5	5	5	5	5	5	5	5	5	3	4	2	3	5	5	2	5	4	4	5	4	4	4	4	5	4	5	5	5	5	5	5	4	2	3	5	5	4	4
2020-03-29 08:59:10	Student	Military Institute of Science and Technology	Cumilla	Female	4	3	3	5	4	3	4	5	5	4	5	5	5	4	4	4	3	3	3	5	5	3	5	5	5	5	5	5	5	5	5	5	5	5	5	5	5	5	4	4	5	5	5	5	5
2020-03-29 09:02:05	Business	M. Hafiz Ullah	Dhaka	Male	4	3	3	3	5	5	5	5	4	5	5	5	5	4	5	1	2	2	2	5	5	4	5	3	4	5	5	4	5	5	4	3	5	5	5	5	5	5	5	5	3	5	4	5	5
2020-03-29 09:29:32	Govt service	Deptt of Environment	Dhaka	Male	3	4	4	3	4	4	5	4	5	5	5	5	5	4	5	5	4	2	3	4	3	3	4	5	5	5	5	5	4	4	5	5	4	4	3	3	4	3	4	3	4	4	4	4	3
2020-03-29 09:48:02	Student	Jahangirnagar University		Male	5	5	5	4	3	5	5	5	4	5	5	5	5	5	5	5	2	1	3	5	2	2	5	5	4	5	5	2	4	4	5	5	3	5	5	5	5	5	3	3	2	5	5	5	4
2020-03-29 09:51:11	Development Professional	BRAC	Dhaka	Male	4	3	2	4	4	5	5	5	5	5	5	5	5	5	1	3	3	3	3	4	4	4	4	5	5	5	4	5	5	5	5	5	5	5	4	5	5	5	4	4	5	5	5	5	5
2020-03-29 09:54:11	Student	Sher-e-Bangla Agricultural University	Sher-e-Bangla Nagar, Dhaka-1207	Female	5	3	3	5	5	5	4	5	5	5	5	5	5	4	5	4	1	1	1	5	5	4	3	2	4	5	5	4	5	4	5	5	5	5	5	5	5	5	4	3	4	5	5	5	5
2020-03-29 10:02:30	Student	Bangladesh University of Professionals	Dhaka Cantonment	Male	3	4	4	4	5	5	5	5	4	5	5	5	5	5	5	2	2	2	3	5	4	3	4	4	4	5	5	4	4	5	5	4	5	5	5	5	5	5	5	3	3	4	4	4	4
2020-03-29 10:08:30	Student	Jahangirnagar University	Savar, Dhaka-1342	Male	3	1	3	4	3	3	5	5	5	5	5	5	5	3	5	4	5	4	4	5	5	4	5	5	5	5	5	5	5	5	5	5	5	5	4	4	5	5	5	5	5	5	5	4	3
2020-03-29 10:12:34	Lecturer	Military Institute of Science and Technology	Mirpur Cantonment	Male	4	5	5	4	5	5	4	5	5	5	5	5	5	2	5	5	3	2	2	5	5	5	5	4	5	5	5	5	5	2	5	5	5	5	5	5	5	5	5	5	3	5	2	5	5
2020-03-29 10:19:30	Student	Jahangirnagar University	Dhaka	Female	3	3	3	4	4	5	5	5	5	5	5	5	5	4	5	1	2	1	2	5	5	4	5	5	5	5	5	5	5	5	5	5	5	5	5	5	5	5	5	3	4	5	5	5	5
2020-03-29 10:22:08	Govt. Service Holder	Department of Environment	Chattogram	Male	5	4	3	5	5	5	5	5	3	5	5	4	5	5	5	1	4	3	4	5	5	2	5	4	5	5	5	5	5	5	5	4	4	5	4	5	5	4	5	4	5	5	5	5	5
2020-03-29 10:26:03	Student	Jahangirnagar University	Savar	Female	5	5	5	5	5	5	5	5	5	5	5	5	5	5	5	5	1	4	4	5	5	3	5	5	5	5	5	5	5	5	5	5	5	5	5	5	5	5	5	5	3	5	5	5	5
2020-03-29 10:27:42	Student	Faridpur Engineering College	Narayanganj	Male	4	4	4	2	4	5	4	5	5	5	5	5	5	5	5	2	3	2	3	5	5	3	5	4	4	5	5	4	3	5	5	5	5	4	4	5	5	5	3	5	3	5	5	5	5
2020-03-29 10:28:08	Development Service	BRAC	Dhaka	Male	4	4	5	3	4	5	5	4	5	5	5	5	5	5	5	5	2	2	2	5	5	5	5	4	4	5	5	5	2	3	5	5	3	4	5	5	5	5	5	4	4	4	5	5	5
2020-03-29 10:32:20	student	Rajshahi University	Magura	Male	5	3	3	3	5	5	5	5	5	5	5	5	5	5	5	1	1	1	3	5	5	3	4	5	5	5	4	5	5	4	5	4	5	5	5	5	5	5	5	5	3	5	5	5	5
2020-03-29 10:37:42	Teaching	BSMRAU	Gazipur	Male	4	4	4	4	3	4	4	4	3	5	5	5	4	2	4	2	2	2	3	4	5	2	5	4	4	4	3	4	3	4	4	5	3	4	4	4	4	4	4	3	3	5	2	4	3
2020-03-29 10:38:15	Material Writer	British Council Bangladesh	Joypurhat	Female	5	5	5	3	4	5	5	5	4	5	5	4	5	5	5	4	3	1	4	5	5	3	5	5	5	5	5	5	4	5	5	5	4	5	3	4	4	3	4	3	5	5	5	5	5
2020-03-29 10:38:46	Service	Department of Environment	Gazipur	Male	4	4	5	5	5	5	5	5	4	5	5	5	5	5	5	2	4	2	4	5	5	5	5	5	5	5	5	5	4	4	5	5	3	5	5	5	5	5	3	3	4	5	5	5	5
2020-03-29 10:42:36	Student	Daffodil International University	Sukrabad, Dhaka	Male	5	5	4	5	5	5	5	5	5	4	4	4	4	5	5	1	1	1	1	4	4	3	4	4	4	4	4	2	4	4	4	4	4	4	3	4	4	4	4	5	4	5	4	5	4
2020-03-29 10:43:48	Student	Comilla University	Comilla	Male	4	5	5	5	3	5	5	5	4	5	5	4	4	1	3	2	2	1	1	5	5	4	5	2	4	5	4	1	4	5	4	5	3	3	2	5	5	4	4	1	1	5	5	5	5
2020-03-29 10:47:07	Student	Jahangirnagar University	Savar, Dhaka	Male	5	5	5	5	5	5	5	5	5	5	5	5	5	5	5	3	4	2	2	4	5	3	5	5	5	5	5	4	5	5	5	5	3	5	5	5	5	5	5	3	4	5	4	4	4
2020-03-29 10:48:38	Engineer	NSU	Dhaka	Male	4	3	3	4	5	4	5	5	5	5	5	5	5	5	5	2	3	2	4	5	5	4	5	5	4	5	5	4	4	4	4	4	3	4	3	5	4	5	4	2	3	5	5	5	5
2020-03-29 10:49:12	Student	Faridpur Engineering College, Faculty of Engineering and Technology, University of Dhaka	Sec-12, Mirpur,Dhaka	Female	4	4	5	4	5	5	5	4	5	5	5	5	4	4	5	3	4	4	3	5	5	5	5	4	4	5	5	5	4	5	5	4	5	5	4	5	5	5	4	4	4	5	5	5	5
2020-03-29 10:51:16	Student	Jahangirnagar University	Dhaka	Male	4	4	4	3	1	3	4	5	3	3	3	4	4	3	4	4	3	3	4	4	4	3	4	4	4	5	3	4	4	4	4	4	3	4	3	4	4	4	4	3	3	4	4	4	4
2020-03-29 10:51:30	Junior operational manager	Me-Solshare ltd	Banasree	Female	5	5	5	1	5	5	1	5	2	5	5	5	5	5	5	1	5	2	2	4	5	4	5	5	5	5	5	5	5	4	5	5	5	5	5	5	5	5	5	3	3	5	5	5	5
2020-03-29 10:53:18	Service	Agrani Bank Limited	Tongi	Male	3	3	3	5	5	5	5	5	5	5	5	5	5	5	5	5	5	5	5	5	5	5	5	5	4	4	5	4	5	4	4	5	5	5	4	4	5	5	5	5	5	5	5	5	5
2020-03-29 10:54:19	4.Agree	Govt.Ashek Mahmud College	Jamalpur	Male	4	3	2	4	3	2	3	3	3	3	3	3	3	3	3	4	3	3	3	3	3	2	4	3	3	5	5	4	4	5	5	4	2	3	3	2	2	2	3	1	4	2	3	4	3
2020-03-29 11:01:02	Architect	Framework	Dhanmondi, Dhaka	Female	5	5	5	4	5	5	3	3	1	5	5	5	5	1	5	4	1	1	1	5	5	3	5	5	5	5	3	5	1	5	3	1	3	5	5	5	5	5	5	5	5	5	5	5	5
2020-03-29 11:03:29	Doctor	DG office	Indira road , farmgate	Female	5	5	5	5	5	3	4	4	2	4	4	5	3	3	5	4	5	4	4	5	5	4	5	5	4	5	5	3	4	4	5	5	4	4	3	5	4	4	4	3	4	5	5	4	4
2020-03-29 11:05:43	Student	HSTU	Dinajpur	Male	4	2	2	3	2	4	3	5	4	4	4	3	4	3	5	5	4	4	3	5	4	4	5	4	5	5	4	5	3	4	4	3	2	3	2	2	2	3	3	2	2	2	3	3	4
2020-03-29 11:06:26	Student	Daffodil International University	Daulatpur, Kushtia	Male	3	2	3	3	4	2	4	5	4	5	5	4	5	4	5	3	1	1	2	5	5	3	4	4	4	5	5	5	5	5	5	3	3	3	4	5	4	5	4	5	4	5	4	4	5
2020-03-29 11:07:04	Student	Jahangirnagar University	Savar	Male	3	3	1	4	5	3	3	3	3	5	4	5	5	5	3	4	4	4	3	3	4	3	5	4	5	5	5	5	3	3	3	4	5	3	3	3	4	3	3	4	3	3	3	5	5
2020-03-29 11:07:24	Student	DIU	Savar	Male	5	5	5	4	4	3	3	5	5	5	5	5	5	5	4	2	2	1	3	3	4	4	4	3	4	4	5	5	4	5	5	4	4	3	3	3	3	3	3	3	4	4	4	4	4
2020-03-29 11:07:27	Student	Rajshahi University of Engineering & Technology	Rajshahi	Male	5	4	5	4	5	5	4	5	3	5	4	4	4	1	4	4	3	4	4	5	4	3	4	5	5	5	5	5	5	3	5	3	3	5	5	5	5	4	4	4	4	5	4	5	5
2020-03-29 11:15:13	Researcher	International centre for climate change and development	Dhanmondi	Female	4	4	4	5	5	5	5	5	5	5	5	5	5	5	5	5	3	2	2	5	5	4	4	5	5	5	5	5	4	5	5	4	5	5	4	5	5	4	5	5	3	5	4	5	5
2020-03-29 11:17:02	Teaching	Jahangirnagar University	Jahangirnagar University	Male	4	5	4	3	4	5	1	2	2	5	5	5	5	5	5	5	1	1	1	1	5	2	5	3	4	5	3	5	3	5	5	5	5	5	4	5	5	5	4	5	4	5	4	4	4
2020-03-29 11:18:19	Program manager	Jahangirnagar University	Dhaka	Male	5	5	5	3	5	5	5	5	3	5	5	5	5	5	5	1	1	1	2	5	5	3	4	5	5	5	5	5	5	5	5	5	5	5	5	5	5	5	5	5	4	5	5	5	5
2020-03-29 11:20:50	Student	IUBAT	Uttara	Male	4	3	3	5	5	3	5	4	5	5	5	5	4	2	5	1	3	1	5	5	5	1	5	3	5	5	1	5	3	5	5	2	2	5	3	5	5	5	5	5	3	5	5	5	5
2020-03-29 11:22:09	Health Professional	Handicap International	Teknaf, Cox's Bazar	Male	4	4	5	5	4	4	4	5	5	4	5	5	5	4	5	3	3	2	3	5	5	5	4	5	5	5	4	4	3	3	4	5	5	5	5	5	5	4	3	4	3	5	4	5	5
2020-03-29 11:23:37	Student	University of Dhaka	Dhaka	Male	4	3	1	3	2	3	5	5	5	5	5	5	5	4	5	2	2	2	3	5	5	3	5	4	3	4	3	2	3	3	3	2	5	3	3	4	4	3	5	3	4	4	3	2	2
2020-03-29 11:24:01	Private Job holder	Brac	Bauphal, Potuakhali	Male	4	4	5	4	4	3	5	3	5	5	5	4	4	5	5	3	5	4	4	5	5	4	5	5	5	5	4	4	5	5	5	4	4	5	5	5	5	4	3	2	5	5	4	5	4
2020-03-29 11:24:58	Students	Daffodil International University	Dhaka	Male	4	4	4	5	4	4	3	3	3	5	5	5	5	5	5	4	3	4	4	4	4	4	5	5	4	4	4	5	5	5	4	4	4	5	4	4	4	4	4	3	4	4	5	5	5
2020-03-29 11:25:04	Student	Jahangirnagar University	Brahmanbaria	Female	5	5	5	5	5	5	5	5	5	5	5	5	5	5	5	1	4	4	5	5	5	4	5	5	5	5	5	5	5	5	5	5	5	5	5	5	5	5	5	5	5	5	5	5	5
2020-03-29 11:25:36	Student	Bangladesh University of Professionals (BUP)	Khilkhet, Dhaka.	Male	4	4	5	4	5	4	5	4	4	5	5	4	5	4	5	4	3	2	3	5	5	3	4	5	5	5	3	4	5	5	5	4	4	4	5	5	5	4	4	4	5	5	5	5	5
2020-03-29 11:25:46	Student	JU	Dhaka	Male	5	5	5	5	5	4	5	5	5	5	5	5	5	5	5	2	3	2	3	5	4	4	5	5	5	5	5	5	4	4	4	5	5	5	5	5	5	5	5	5	4	4	4	4	4
2020-03-29 11:26:02	Doctor	Fuad Diagnostic & Consultation Center	Gazipur	Male	4	4	5	4	5	5	5	5	5	5	5	5	5	5	5	1	1	2	1	5	5	3	4	4	4	5	5	4	4	5	4	4	4	5	5	5	5	5	4	3	3	4	5	5	5
2020-03-29 11:27:15	Student	Jahangirnagar University	Savar,Dhaka	Male	5	5	5	5	5	4	5	5	4	5	5	5	5	5	5	2	2	2	4	5	5	4	5	5	5	5	4	4	3	4	5	5	3	5	5	5	5	5	4	4	4	5	5	5	5
2020-03-29 11:29:02	Freelancer	Happy Clicking	Mirpur	Male	5	5	4	5	4	5	4	4	4	5	5	4	5	1	5	5	1	1	3	4	5	4	5	5	5	5	4	5	4	5	4	4	5	5	5	5	5	4	4	1	3	4	4	5	4
2020-03-29 11:29:44	Student	Jahangirnagar University	Chuadanga	Female	3	5	5	5	5	5	5	5	5	5	5	5	5	5	5	4	4	3	4	5	5	5	5	5	5	5	5	5	5	5	5	5	5	5	5	5	5	5	5	4	4	5	4	5	5
2020-03-29 11:29:44	Government Service	Directorate General of Family Planning	Munshiganj	Male	4	3	4	4	5	3	5	5	4	4	5	5	5	4	4	5	5	3	2	5	5	2	5	5	5	5	5	4	4	3	5	5	5	4	3	4	4	5	5	3	3	4	2	4	4
2020-03-29 11:32:30	Business	Self employment	Dhaka	Male	5	4	5	4	3	5	5	5	5	5	5	5	5	5	3	1	2	1	3	5	5	3	5	1	5	1	5	4	3	3	1	5	5	5	5	5	5	5	5	2	5	4	4	3	2
2020-03-29 11:32:41	Business	Self employed	Pallabi	Male	5	5	5	5	5	5	5	5	5	5	5	5	5	5	5	2	2	2	4	5	5	5	5	5	5	5	5	5	4	5	5	5	4	5	5	5	5	5	5	4	5	5	4	5	5
2020-03-29 11:38:05	Development worker	BRAC	HO	Male	4	4	5	4	4	5	5	4	5	4	5	5	4	5	5	4	2	2	2	5	4	4	5	5	5	5	4	4	4	4	4	4	4	5	5	5	5	4	4	4	4	5	5	4	4
2020-03-29 11:38:15	banker	Bangladesh Development Bank Limited	Gazipur	Male	4	5	4	5	4	4	5	5	5	5	5	5	5	5	5	1	2	2	2	5	5	2	4	5	5	5	4	4	5	4	4	4	5	4	4	4	4	4	3	4	4	5	5	4	4
2020-03-29 11:40:35	Student	Department of Environmental Sciences	Savar	Female	4	4	4	4	4	4	4	5	4	5	5	5	5	5	5	3	4	3	3	4	4	4	4	4	4	5	4	4	4	4	4	4	4	5	5	5	5	5	5	5	4	5	5	5	5
2020-03-29 11:40:44	Student	Jahangirnagar University	Savar, Dhaka	Female	5	4	5	4	5	2	4	5	5	5	5	5	5	3	5	2	2	3	3	5	5	3	4	5	4	4	4	3	4	5	4	5	4	4	4	5	5	5	4	3	3	5	3	4	3
2020-03-29 11:41:24	Student	Mist	Dhaka	Female	5	5	5	3	5	4	4	3	5	5	5	4	5	5	5	5	1	1	1	5	5	3	3	4	4	5	5	4	5	4	5	4	4	4	4	5	5	4	4	3	3	5	4	4	3
2020-03-29 11:43:01	Student	Jahangirnagar University	Savar, Dhaka	Female	4	3	4	4	5	4	5	5	4	4	4	3	4	5	5	2	3	2	3	4	4	3	4	5	4	4	5	4	4	4	5	5	4	4	4	4	4	4	4	3	3	5	4	5	4
2020-03-29 11:44:25	Software Engineer	BJIT	Dhaka	Male	5	4	5	4	5	5	5	4	5	4	5	4	5	4	5	2	4	2	3	5	5	3	4	5	5	5	5	4	4	4	4	2	5	4	3	5	5	3	4	4	4	5	3	5	4
2020-03-29 11:44:36	Govt job	Bangladesh police	Dhaka	Male	4	5	5	2	4	5	5	5	4	4	4	5	5	4	5	4	4	5	4	5	5	4	5	3	3	5	5	5	4	5	5	5	4	5	5	5	5	5	5	1	1	5	5	5	5
2020-03-29 11:47:06	Student	Jahangirnagar University	Mirpur	Female	5	3	4	5	5	5	5	5	5	5	5	5	5	5	5	1	2	1	1	5	5	3	5	5	5	5	4	5	5	5	5	5	5	4	4	5	5	4	5	3	3	5	5	5	5
2020-03-29 11:47:07	student	Jahangirnagar University	Savar	Female	4	4	2	3	3	5	5	5	5	5	5	5	5	5	5	2	2	1	2	5	5	3	4	5	5	5	5	5	5	5	5	5	5	5	5	5	5	5	3	3	3	5	5	5	5
2020-03-29 11:47:19	Student	Jahangirnagar University		Female	5	5	5	5	5	4	5	5	5	5	5	4	4	4	4	3	4	1	2	5	5	2	4	5	5	5	5	4	5	3	4	5	4	4	4	5	5	5	4	4	4	5	4	4	4
2020-03-29 11:48:54	Student	Jahangirnagar University	Dhaka	Female	5	5	5	5	3	4	5	5	4	3	5	5	5	3	3	1	2	1	2	5	5	1	5	5	5	5	5	5	4	4	5	5	4	5	5	4	3	5	1	3	4	5	5	5	5
2020-03-29 11:51:55	Doctor	CMC ctg	Chittagong	Male	5	5	5	5	5	5	5	5	5	5	5	5	5	5	5	5	5	1	3	5	5	5	3	3	4	3	3	3	3	3	4	3	3	5	5	5	5	5	5	5	5	5	5	5	5
2020-03-29 11:52:10	Student	Jahangirnagar University	Savar, Dhaka	Female	5	4	5	5	5	4	5	5	4	4	4	4	5	5	5	3	4	3	4	5	5	4	5	5	5	5	5	5	5	4	5	5	5	4	5	5	5	5	4	5	4	5	5	5	5
2020-03-29 11:52:42	Student	Jahangirnagar University	Dhaka	Female	4	3	4	4	4	4	5	4	3	5	4	5	5	5	4	2	2	2	2	4	4	4	4	5	4	5	5	4	4	4	5	4	4	4	4	4	4	5	4	4	4	4	4	4	4
2020-03-29 11:52:51	Service	Offshore Bd	Moghbazar	Male	5	5	5	5	5	3	5	5	4	5	5	5	5	5	5	1	2	2	3	5	5	3	5	4	5	5	5	5	3	5	5	5	5	4	4	3	3	3	4	3	3	5	3	4	3
2020-03-29 11:53:29	Home maker	NA	Dhaka University	Female	5	5	5	5	5	5	5	4	5	5	5	5	5	5	5	1	1	1	1	5	5	5	5	5	5	5	5	5	5	5	5	5	5	5	5	5	5	5	5	5	3	5	5	5	5
2020-03-29 11:54:11	Student	Jahangirnagar University,Savar	Chittagon, Bangladesh	Male	3	3	2	4	5	5	5	5	5	5	5	5	5	4	5	4	4	4	2	5	5	3	5	4	5	5	4	5	5	5	5	5	4	3	3	5	5	5	5	4	5	5	4	4	5
2020-03-29 11:56:15	Student	Jahangirnagar university	Dhaka	Female	4	4	5	4	5	5	4	4	3	4	4	4	5	3	5	3	4	3	4	5	5	3	4	5	4	5	5	5	5	5	5	4	5	3	3	4	4	5	4	3	5	5	5	5	5
2020-03-29 11:57:51	student	Jatiya kabi Kazi Nazrul Islam University	Bhuapur, Tangail	Male	4	5	4	5	5	5	5	5	5	5	5	5	5	5	5	3	4	1	3	5	5	3	5	5	5	5	5	5	5	5	5	5	5	5	5	5	5	5	5	4	4	5	5	5	5
2020-03-29 12:00:39	Doctor	Essential Diagnostic	Khilgaon	Male	3	3	5	3	1	5	5	4	5	5	5	4	4	3	5	4	3	3	3	4	5	4	5	5	4	5	5	5	5	5	5	5	3	5	4	5	4	5	4	3	5	5	3	5	5
2020-03-29 12:01:34	Lecturer	BUET	Dhaka	Female	5	5	5	5	4	5	5	5	3	5	5	5	5	5	5	1	3	2	1	3	5	2	5	5	5	5	2	5	5	5	5	5	5	5	4	5	5	5	5	5	3	5	5	5	5
2020-03-29 12:02:01	Intern doctor	East-west medical college	Dhur, turag, Dhaka	Female	5	5	5	5	5	3	5	4	3	5	5	5	5	3	5	1	1	3	3	3	5	3	5	5	5	5	5	5	5	5	5	5	5	5	5	5	5	5	5	5	3	5	5	5	5
2020-03-29 12:04:10	Doctor	Colonel Malek Medical College, Manikganj	Manikganj	Female	5	5	5	5	5	5	5	5	4	5	5	3	5	2	3	3	1	1	3	5	5	4	5	5	5	5	4	4	4	4	5	5	5	5	5	5	5	5	5	4	3	5	4	4	4
2020-03-29 12:04:34	Teaching	Begum Rokeya University	Rangpur	Male	4	4	5	4	4	5	4	5	5	4	5	4	5	5	4	2	3	3	4	4	4	4	5	5	5	5	4	5	4	4	4	4	5	4	4	4	4	5	4	2	4	4	4	4	4
2020-03-29 12:05:15	Student	Bangladesh University of Professionals	22, New Eskaton, Dhaka	Male	3	3	3	4	4	3	3	3	3	3	3	3	5	2	4	4	3	3	3	4	5	3	4	4	4	4	4	4	4	4	4	3	3	4	3	4	4	3	3	3	3	3	3	3	3
2020-03-29 12:05:15	Student	Dhaka University	Dhaka	Male	5	5	5	4	5	5	5	4	5	5	5	5	5	5	5	1	5	5	5	5	5	5	5	5	4	5	5	5	5	5	5	4	4	5	5	5	5	5	5	3	4	3	5	3	5
2020-03-29 12:05:51	Student	Army medical college jashore	Jashore	Male	5	5	5	1	1	1	4	4	2	5	4	5	5	5	4	5	5	5	5	5	5	5	5	4	5	5	4	1	2	1	4	5	1	5	4	4	5	5	5	1	4	5	5	5	5
2020-03-29 12:07:21	Student	Jahangirnagar University	Savar,Dhaka	Female	1	5	5	5	3	5	5	5	5	5	5	5	5	4	5	1	1	1	1	4	5	3	5	5	4	5	5	5	5	5	5	5	5	5	5	5	5	5	5	5	5	5	5	5	5
2020-03-29 12:08:44	Student	University of Dhaka	Sector 7, Uttara Model Town, Dhaka	Female	5	5	5	5	5	5	5	5	5	5	5	5	5	5	5	2	3	1	5	5	5	4	5	5	5	5	4	4	5	5	5	5	4	5	4	5	5	5	4	4	5	5	4	5	5
2020-03-29 12:08:50	Engineer	ISCEA	Dhaka	Male	5	5	5	5	5	5	5	5	5	5	5	5	5	5	5	1	1	1	1	5	5	1	5	5	5	5	5	5	5	5	5	5	5	5	5	5	5	5	5	5	5	5	5	5	5
2020-03-29 12:08:59	Student	Jahangirnagar University	Savar,Dhaka	Female	3	4	4	3	4	3	4	5	4	3	4	3	3	4	4	4	4	4	3	4	4	3	4	3	3	5	4	4	4	2	4	3	4	3	4	3	4	3	4	3	3	4	4	4	3
2020-03-29 12:09:14	Student of MSc in Biotechnology	Brac University	Mohakhali	Female	5	5	5	4	3	5	5	5	1	5	2	5	3	1	5	2	2	4	5	5	5	3	5	5	5	5	5	5	5	5	5	5	4	5	5	5	5	3	5	1	5	5	5	5	5
2020-03-29 12:09:55	Student	BRAC University	Green Road	Male	5	5	4	5	3	5	5	5	5	5	4	4	5	5	5	1	1	1	3	4	5	1	4	4	5	5	5	4	4	5	5	3	4	5	5	5	4	5	5	5	5	4	5	5	5
2020-03-29 12:10:22	Student	Jahangirnagar University	Tangail	Male	4	5	5	3	5	4	4	4	5	5	5	5	4	5	5	4	5	4	4	5	5	4	5	5	5	5	5	4	4	4	5	4	4	5	5	5	5	5	5	4	3	4	4	4	4
2020-03-29 12:12:46	Student	BUP	DHAKA	Male	4	3	3	4	5	3	4	5	4	4	5	5	5	5	5	1	1	1	1	5	5	5	1	1	4	5	5	5	5	5	5	5	5	3	4	5	5	5	5	2	3	5	5	5	5
2020-03-29 12:12:46	Student	Daffodil International university	Dhanmondi	Female	5	5	5	5	5	5	5	5	5	5	5	5	5	5	5	5	4	5	1	5	5	3	5	5	5	5	5	5	5	4	5	5	5	4	2	4	5	5	3	4	3	5	5	5	5
2020-03-29 12:14:21	Student	Jahangirnagar University	Kazipara	Male	5	5	5	4	5	5	5	5	3	5	5	5	5	1	5	1	1	1	3	5	5	4	4	5	5	5	4	5	5	5	5	5	5	4	5	5	5	5	5	5	4	5	5	5	5
2020-03-29 12:14:45	Student	Jahangirnagar University	Savar, Dhaka	Male	5	4	5	5	5	5	5	4	4	5	5	5	5	4	5	2	2	1	3	5	5	4	5	4	4	5	5	5	4	4	5	5	5	5	5	5	5	5	5	4	4	5	5	5	5
2020-03-29 12:14:57	Student	Jahangirnagar University	Savar,Dhaka	Male	5	4	5	4	5	4	4	5	4	5	4	5	5	5	5	3	2	2	3	4	4	3	4	4	5	5	5	5	5	5	5	5	5	5	4	5	5	5	4	5	3	5	4	5	4
2020-03-29 12:15:18	Student	Jahangirnagar University	Savar,Dhaka-1342	Male	3	3	3	4	4	5	5	5	4	5	5	4	5	5	5	2	2	1	2	5	5	3	4	5	4	5	4	4	4	5	5	5	4	3	5	5	5	5	5	2	4	5	5	5	5
2020-03-29 12:17:54	Student	Jahangirnagar University	Savar	Male	4	3	5	5	5	5	5	5	2	2	2	5	5	3	2	5	5	4	4	5	4	4	5	2	5	5	5	5	3	2	3	5	4	5	5	5	5	5	5	2	4	3	3	5	5
2020-03-29 12:17:54	Student	Faridpur Engineering College	Dhaka	Female	4	4	5	5	5	4	4	5	5	5	5	5	5	5	4	5	4	4	4	4	5	4	5	5	5	5	5	5	5	5	5	5	4	4	4	4	5	5	4	4	5	5	5	5	5
2020-03-29 12:18:32	Student	Chattogram Veterinary and Animal Sciences University	Chattogram	Female	5	3	4	3	4	5	5	5	4	5	1	5	5	5	5	4	3	3	3	5	5	4	3	5	3	5	4	5	4	5	5	5	5	5	5	5	5	5	5	4	4	5	5	5	5
2020-03-29 12:18:52	Private Service Holder	IBA, Jahangirnagar University	Paltan	Male	3	3	3	3	4	5	5	4	4	5	5	3	5	5	5	3	4	4	4	4	5	4	4	4	5	5	4	4	4	4	4	4	5	3	2	4	4	3	3	1	2	2	2	5	5
2020-03-29 12:20:12	Teacher	Bangabandhu Sheikh Mujibur Rahman Science and Technology University	Gopalganj	Male	4	4	4	4	5	4	4	5	4	4	5	4	5	4	4	2	3	2	3	4	4	4	4	4	4	4	4	3	4	4	4	4	4	4	5	4	4	4	4	4	4	4	4	4	4
2020-03-29 12:20:13	Student	Jahangirnagar University	Mohammadpur, Dhaka.	Female	5	5	5	4	5	4	5	5	3	4	5	5	5	2	5	2	3	2	2	4	5	4	5	5	5	5	5	5	5	5	5	4	4	5	5	5	5	4	3	5	5	4	4	5	5
2020-03-29 12:20:15	Student	Jahangirnagar University	Mohammadpur	Male	5	3	4	3	4	5	2	5	5	5	5	5	5	1	5	4	1	1	1	5	5	4	5	4	3	3	3	2	3	2	4	4	4	5	5	5	5	4	4	3	2	5	3	2	2
2020-03-29 12:20:47	student	Delta Medical College	Brahmanbaria	Female	4	4	1	4	4	4	4	4	4	4	4	4	4	4	4	2	4	4	2	5	4	4	4	4	4	5	4	4	4	5	5	5	5	4	5	5	5	5	4	4	4	5	4	5	4
2020-03-29 12:21:37	kawsar	Khulna University of Engineering and Technology	Khulna	Male	5	5	5	5	5	5	5	5	5	5	5	5	5	5	5	1	5	4	5	5	5	4	3	5	5	5	5	5	4	4	5	5	2	5	5	4	5	5	5	3	2	5	5	5	4
2020-03-29 12:22:44	Job holdar	Square pharmaceuticals	Mymensingh	Male	5	5	5	4	5	5	5	5	5	5	5	5	5	5	5	4	5	5	5	5	5	5	5	5	5	5	5	5	5	5	5	5	5	5	1	5	5	5	5	5	5	5	5	5	5
2020-03-29 12:23:04	Assistant professor	KUET	Khulna	Female	5	4	4	4	4	5	4	5	4	5	5	5	5	5	5	1	2	2	3	3	4	4	4	4	4	5	5	5	3	5	5	4	4	4	4	5	5	5	5	5	4	4	5	5	5
2020-03-29 12:23:37	Student	Noakhali Science and Technology University	Brahmanbaria	Female	5	5	5	3	5	4	5	5	3	5	4	5	5	1	5	4	1	1	1	5	5	3	4	5	5	5	4	5	3	3	5	5	5	5	4	5	5	5	3	5	4	5	4	5	4
2020-03-29 12:27:06	Student	Khulna University of Engineering & Technology, Khulna	Khulna	Male	3	4	5	3	5	4	5	5	5	5	4	5	5	1	5	4	1	4	4	5	5	1	5	5	5	5	5	5	5	3	5	5	5	5	5	5	5	5	5	5	3	5	5	5	5
2020-03-29 12:27:23	Student	Jahangirnagar University	Savar	Female	2	3	4	5	5	5	5	1	5	4	4	4	4	4	5	3	5	5	5	5	5	3	1	5	5	5	5	5	5	5	5	5	5	3	3	4	4	4	4	4	4	4	4	4	4
2020-03-29 12:27:43	Student	North South University	Dhaka	Female	4	5	5	5	5	5	5	5	5	5	5	5	5	5	5	1	1	1	1	5	5	3	5	5	5	5	5	5	5	5	5	4	5	5	5	5	5	5	5	5	5	5	5	5	5
2020-03-29 12:29:01	Student	Jahangirnagar University	Khulna	Female	5	5	5	5	5	4	5	5	5	5	5	5	5	4	5	2	2	2	4	4	5	5	5	5	5	5	5	5	5	5	5	5	4	3	5	5	5	5	5	5	5	5	5	5	5
2020-03-29 12:29:08	Teacher	Jahangirnagar University	Uttara	Female	3	3	3	4	3	5	5	4	5	5	5	5	5	5	5	2	2	1	2	5	5	3	5	5	5	5	5	5	3	3	4	5	4	5	5	5	5	5	5	5	3	4	3	5	4
2020-03-29 12:29:45	student	Begum Rokeya University,Rangpur	Lalmonirhat	Female	5	4	5	5	5	5	5	5	5	5	5	4	5	5	5	1	2	2	3	5	5	2	5	5	4	5	5	4	4	4	5	5	4	4	5	5	5	4	5	4	4	5	4	5	5
2020-03-29 12:30:33	Student	Jahangirnagar University	Rangpur	Male	2	2	4	5	4	5	5	4	4	4	5	5	5	2	5	4	2	1	4	5	5	3	4	5	5	5	4	4	4	5	4	5	4	5	5	5	5	5	5	5	3	5	5	4	4
2020-03-29 12:31:00	Medical physician	Jahangirnagar university medical center	Savar, Dhaka	Male	4	4	3	4	4	5	5	5	5	5	5	4	5	5	5	4	5	5	4	5	5	5	5	5	5	5	5	5	3	3	5	5	5	5	5	5	5	4	5	4	4	5	2	5	5
2020-03-29 12:31:21	Student	North East Medical College	Sylhet	Male	2	4	4	4	4	3	5	5	2	5	4	4	5	5	4	4	4	2	3	5	4	3	5	4	4	5	4	4	4	4	5	4	4	3	3	4	4	4	4	3	3	4	4	4	4
2020-03-29 12:31:54	Student	Jahangirnagar university	Savar	Female	5	5	5	5	5	5	4	4	4	5	5	5	5	4	4	3	4	3	4	5	5	3	4	4	5	5	3	4	4	4	4	5	3	4	4	4	4	4	4	3	3	4	4	5	4
2020-03-29 12:31:55	Student	Chattrogram veterinary and Animal sciences university	khulsi, chattagram	Male	5	5	4	5	4	5	5	5	4	4	4	4	5	3	2	4	4	2	2	5	5	5	5	5	3	5	2	2	3	2	2	4	1	5	4	5	4	5	4	4	3	4	4	4	2
2020-03-29 12:32:09	Student	Jahangirnagar University	Manikgonj	Female	3	3	3	3	3	3	3	3	3	3	3	3	3	3	3	3	3	3	3	3	3	3	3	3	3	3	3	3	3	3	3	3	3	3	3	3	3	3	3	3	3	3	3	3	3
2020-03-29 12:33:35	Student	Begum Rokeya University, Rangpur	Rangpur	Male	4	3	4	3	4	5	4	5	5	5	5	5	4	4	5	3	4	2	1	5	5	4	4	5	5	5	2	4	4	4	5	4	4	3	3	5	5	4	4	3	3	5	5	5	4
2020-03-29 12:33:57	Student	Jahangirnagar University	Gazipur	Male	5	2	3	5	4	5	5	4	4	5	5	5	5	4	5	1	3	3	3	5	5	4	5	5	5	5	2	5	4	4	5	5	3	5	4	5	5	5	4	2	4	5	5	5	4
2020-03-29 12:34:44	Student	University of Dhaka	Dhaka	Male	5	3	3	5	5	5	5	4	5	5	5	5	5	4	5	5	2	1	2	5	5	3	5	5	4	5	5	4	3	5	5	4	5	5	5	5	5	5	4	5	4	5	4	5	4
2020-03-29 12:35:23	Student	Khulna University of Engineering and Technology	Dhaka(Currently)	Female	2	3	3	3	4	4	5	5	5	5	5	5	5	5	5	3	4	1	3	5	5	4	5	5	5	5	4	5	3	3	5	5	2	4	3	5	5	5	3	1	2	5	3	5	4
2020-03-29 12:35:42	Engineer	Energypac Engineering Ltd		Female	4	3	4	2	3	5	4	5	5	5	4	4	5	4	5	3	3	3	3	4	4	3	4	5	4	5	4	5	4	4	4	4	4	4	4	4	5	5	4	5	3	5	4	5	5
2020-03-29 12:36:55	Student	Jahangirnagar University	Boalmari, Faridpur	Male	4	4	4	5	5	4	5	5	4	5	2	5	5	1	4	2	4	1	2	5	5	3	5	5	5	5	5	4	4	4	4	5	2	3	2	5	5	4	5	3	2	4	4	5	4
2020-03-29 12:37:06	Student	Jahangirnagar University	Boalmari, Faridpur	Male	4	4	4	5	5	4	5	5	4	5	2	5	5	1	4	2	4	1	2	5	5	3	5	5	5	5	5	4	4	4	4	5	2	3	2	5	5	4	5	3	2	4	4	5	4
2020-03-29 12:38:31	Student	Jahangirnagar University	Dhaka	Male	5	5	3	5	5	5	4	5	5	3	5	5	5	1	5	3	1	1	2	5	5	5	5	1	5	5	5	5	1	1	5	5	1	5	5	5	5	5	3	3	5	5	5	5	5
2020-03-29 12:38:48	Student	Khulna University of Engineering & Technology	Khulna	Male	2	3	4	2	1	5	5	5	3	5	5	5	5	4	5	3	2	2	4	5	5	3	5	5	5	5	5	5	5	3	5	5	3	5	5	5	5	5	5	5	4	3	3	4	4
2020-03-29 12:38:53	Student	University of Dhaka	Road #13,Nikunjo-2, Khilkhet, Dhaka 1229	Male	4	5	5	4	4	5	5	5	4	5	5	3	5	3	5	1	4	4	3	4	5	3	4	4	4	5	4	4	3	3	4	4	4	4	4	4	5	4	4	3	4	4	4	4	5
2020-03-29 12:39:30	Student	Begum Rokeya Universit, Rangpur.	Rangpur	Male	4	3	4	5	4	5	4	4	4	5	4	4	5	2	3	4	4	3	4	5	5	4	5	5	4	4	4	3	1	4	5	3	3	4	2	5	4	4	4	2	4	4	5	4	2
2020-03-29 12:39:30	student	Jahangirnagar University	Savar,Dhaka,Bangladesh	Male	5	4	5	4	5	4	3	5	5	5	4	5	5	4	5	1	3	3	1	5	4	3	3	5	4	5	5	4	5	5	5	4	4	5	5	5	4	5	4	5	4	5	4	4	4
2020-03-29 12:39:52	Student	Universityof Dhaka	Azimpur	Female	4	5	5	5	3	5	5	5	5	5	5	5	5	5	5	1	4	2	2	5	5	4	5	5	5	5	5	5	5	5	5	5	5	5	5	5	5	5	5	5	3	5	5	5	5
2020-03-29 12:40:07	Medical student	Shahabuddin medical college and hospital	Gulshan 2	Female	4	4	5	5	4	4	4	4	2	4	4	4	4	4	4	1	2	1	2	4	4	4	2	4	4	5	5	5	5	5	5	5	5	4	5	5	5	5	4	2	2	5	5	4	5
2020-03-29 12:40:17	Student	East West University	Brahmanbaria, Bangladesh	Female	5	4	4	4	5	4	5	5	5	4	3	5	5	4	5	3	2	2	3	4	5	3	5	5	5	5	5	5	4	5	4	3	4	3	4	5	5	5	4	3	4	5	5	5	4
2020-03-29 12:41:16	Student	Begum Rokeya University, Rangpur	Rangpur, Bangladesh	Male	4	3	4	3	5	5	5	5	4	5	5	4	5	4	5	2	4	3	3	5	5	3	4	4	4	5	4	4	5	4	4	4	3	4	3	5	4	4	4	3	3	4	4	5	5
2020-03-29 12:42:14	Student	Jashore University Of Science &Technology	Jashore	Male	3	3	1	3	3	5	3	5	5	5	5	5	5	5	5	1	3	3	2	4	5	3	3	4	5	5	5	5	5	5	5	3	5	5	3	5	5	5	5	5	3	5	5	5	5
2020-03-29 12:42:29	Student	Jashore University Of Science &Technology	Jashore	Male	3	3	1	3	3	5	3	5	5	5	5	5	5	5	5	1	3	3	2	4	5	3	3	4	5	5	5	5	5	5	5	3	5	5	3	5	5	5	5	5	3	5	5	5	5
2020-03-29 12:43:59	Student	JU	rangpur	Male	3	3	3	3	3	3	3	3	3	3	4	3	4	4	3	3	4	2	3	3	3	3	3	2	4	4	3	3	4	3	4	3	4	3	3	3	2	4	3	4	3	3	3	3	3
2020-03-29 12:44:41	Student	Jahangirnagar University	Savar	Female	5	4	4	5	5	5	5	5	5	5	5	5	5	5	5	1	1	1	1	5	5	1	5	5	5	5	5	5	4	5	5	5	5	5	5	5	5	5	5	5	4	5	5	5	4
2020-03-29 12:44:50	Student	Begum Rokeya University	Thakurgaon	Male	5	5	3	5	5	5	5	5	4	5	5	5	5	3	5	1	2	4	4	5	5	3	5	5	5	3	5	4	3	5	5	5	5	5	5	5	5	5	5	4	2	5	5	5	5
2020-03-29 12:46:28	student	Jahangirnagar University	Savar,Dhaka	Female	4	3	4	3	4	4	4	5	3	4	4	4	4	3	4	3	4	4	4	5	5	4	4	4	4	5	2	3	3	4	4	4	3	4	4	4	4	3	3	3	3	4	3	4	3
2020-03-29 12:52:05	Government Service	BCSIR	Dhaka	Male	3	2	2	1	2	5	3	4	4	5	4	5	5	4	4	4	4	3	3	4	4	3	5	4	4	5	5	4	5	4	5	4	3	5	4	5	5	4	4	4	3	4	2	4	4
2020-03-29 12:52:30	Student	Jahangirnagar University	Kushtia	Male	5	5	5	5	5	5	5	4	5	5	5	5	5	5	5	2	2	1	1	5	5	5	5	5	5	5	5	5	5	4	5	5	5	5	5	5	5	5	5	5	5	5	5	5	5
2020-03-29 12:52:42	Student	Jahangirnagar University	Mirpur, Dhaka	Female	5	4	4	3	4	5	5	5	5	5	5	5	5	5	5	1	1	1	2	5	5	3	3	3	4	5	5	5	4	5	4	4	4	5	5	5	4	5	5	4	4	5	4	5	5
2020-03-29 12:53:52	Student	Jahangirnagar University	Sec-12, block-c, road-9, house-20, pallabi, mirpur, Dhaka	Female	4	3	3	4	4	5	4	4	3	4	4	4	4	4	4	3	4	4	4	4	4	3	4	4	4	4	4	4	4	5	4	4	4	4	3	4	4	4	4	3	4	4	4	4	4
2020-03-29 12:54:55	Student	Jahangirnagar University	Mirpur, Dhaka	Male	5	5	5	5	5	5	5	5	5	5	5	5	5	5	5	1	3	2	4	5	5	4	5	5	4	5	5	5	4	5	5	5	4	3	3	5	5	5	4	3	2	5	5	4	2
2020-03-29 12:56:26	Student	Jahangirnagar University	Savar	Male	4	5	4	4	4	5	4	3	4	4	4	4	4	4	5	2	2	4	4	2	4	2	4	4	4	5	4	4	5	4	4	4	3	4	2	3	4	4	4	5	3	4	4	5	5
2020-03-29 12:56:48	Student	Govt. Titumir College	mirpur 1	Male	3	5	5	1	4	2	4	4	5	5	5	5	5	5	5	2	3	1	5	5	5	5	5	4	3	5	5	5	5	4	5	4	4	3	4	5	5	4	3	5	4	3	3	3	3
2020-03-29 12:57:11	Student	Nanjing Audit University	China	Male	5	2	1	4	4	4	5	5	5	5	4	4	4	2	3	4	5	4	4	5	5	4	5	5	4	5	3	2	3	3	4	4	5	5	5	5	5	5	4	2	4	4	3	3	3
2020-03-29 13:00:15	Student	Jahangirnagar university	mirpur , dhaka	Male	4	3	5	4	5	5	4	5	4	4	4	4	5	4	5	3	1	2	2	5	4	3	5	5	5	5	5	1	3	5	4	3	3	4	5	3	5	5	3	4	1	4	3	5	5
2020-03-29 13:01:21	Student	Jahangirnagar University	Mirpur	Male	2	2	2	2	4	5	5	5	4	5	5	5	5	5	5	4	2	2	3	4	5	2	4	4	5	5	5	5	5	4	5	5	4	4	3	5	4	5	5	5	5	5	5	5	5
2020-03-29 13:02:08	Student	Jahangirnagar University	Tangail	Female	4	4	3	4	5	5	5	5	5	5	4	4	4	5	4	2	4	3	4	5	5	3	5	4	4	4	5	4	4	4	4	4	3	4	3	4	4	4	5	4	4	5	4	5	5
2020-03-29 13:03:31	Student	University of Barisal	Barisal	Male	4	3	3	5	3	5	5	5	4	5	5	5	5	5	5	2	3	3	2	4	5	3	5	5	5	5	5	5	5	5	5	5	3	4	4	5	5	5	3	5	4	5	5	5	5
2020-03-29 13:06:07	Ito	NTMC	Tejgaon	Female	5	3	3	5	5	5	5	5	5	5	5	4	5	5	5	2	2	2	3	4	5	4	5	4	4	5	5	5	4	5	5	3	2	5	5	5	5	4	4	4	3	5	4	5	5
2020-03-29 13:06:08	student	Jahangirnagar University	Savar	Female	4	3	4	4	3	5	5	5	5	5	5	5	5	5	5	2	2	3	1	5	5	4	5	4	4	4	4	4	4	4	5	3	3	3	4	5	5	5	4	4	3	5	4	4	4
2020-03-29 13:07:37	Student	University of Chittagong	Dhaka	Male	5	5	5	5	5	5	5	5	5	5	5	5	5	5	5	1	1	1	4	4	3	5	5	5	5	5	5	5	5	5	5	5	5	5	5	5	5	5	5	5	5	5	5	5	5
2020-03-29 13:08:57	Retried Govt. Officer	Agrani Bank	Magura	Male	4	4	4	4	5	5	5	5	5	5	5	5	5	5	5	2	4	2	5	5	5	4	5	5	5	5	5	5	5	5	5	5	2	3	5	5	5	5	4	4	5	5	5	5	5
2020-03-29 13:09:00	Student	Jahangirnagar University	Savar,Dhaka	Male	4	3	2	4	4	5	4	5	4	5	4	3	5	5	5	2	4	2	3	5	4	4	4	4	4	5	4	3	3	4	4	4	4	3	3	5	5	4	4	3	4	5	5	5	5
2020-03-29 13:09:10	Student	Jahangirnagar University	Savar	Female	4	5	5	5	5	5	5	5	4	5	5	5	5	5	5	2	2	1	3	5	5	2	4	5	5	5	5	5	5	5	5	5	5	5	4	5	5	5	5	5	4	4	4	5	5
2020-03-29 13:09:18	Student	Gyeongsang National University	South Korea	Male	5	5	5	4	3	5	5	5	5	5	5	5	5	5	5	1	1	1	1	3	5	5	5	5	5	5	5	5	5	5	5	5	5	5	5	5	5	5	5	5	5	5	5	5	5
2020-03-29 13:09:30	Student	Gyeongsang National University	South Korea	Male	5	5	5	4	3	5	5	5	5	5	5	5	5	5	5	1	1	1	1	3	5	5	5	5	5	5	5	5	5	5	5	5	5	5	5	5	5	5	5	5	5	5	5	5	5
2020-03-29 13:10:14	Student	Begum Rokeya University, Rangpur.	Rajarhat, Kurigram (present)	Male	4	4	4	5	4	5	5	5	3	4	4	4	5	1	5	4	2	1	4	5	5	4	4	5	5	5	5	4	4	5	4	5	4	5	5	4	4	4	5	5	4	5	5	5	4
2020-03-29 13:10:30	Student	Rajshahi University	Rajshahi	Female	4	4	4	3	3	3	2	4	3	3	3	2	4	2	5	4	2	2	2	4	5	4	4	5	4	5	5	4	4	4	5	5	4	4	4	4	5	4	4	5	4	5	4	5	5
2020-03-29 13:10:33	Student	Jahangirnagor University	Gopalgonj	Male	2	1	1	1	1	1	5	5	4	4	4	5	5	4	5	5	5	3	5	5	5	4	5	5	4	5	5	5	4	5	5	4	4	4	5	4	5	4	5	1	4	5	5	5	5
2020-03-29 13:11:28	student	pabna science & technology university	chuadanga	Female	5	5	5	5	1	5	5	4	4	5	5	5	5	3	5	2	2	1	3	5	5	4	5	4	5	5	5	4	3	4	5	5	3	3	5	5	5	3	5	4	3	3	4	4	4
2020-03-29 13:13:27	student		Motijheel	Female	5	4	5	4	4	4	4	4	4	4	5	5	5	5	4	3	3	3	3	5	5	4	4	4	4	5	5	5	4	4	4	4	4	4	4	4	4	3	3	3	3	4	4	4	4
2020-03-29 13:13:45	Student	Begum Rokeya University, Rangpur	Park mor,Rangpur	Female	5	5	5	5	5	4	5	5	5	5	5	5	5	5	5	1	4	2	4	5	5	4	5	5	5	5	4	5	5	5	5	5	3	4	5	5	5	2	4	3	5	5	5	5	5
2020-03-29 13:14:10	Student	Begum Rokeya University , Rangpur	Jessore	Male	5	2	4	4	5	5	5	5	5	5	5	5	5	5	5	4	4	3	2	5	5	2	5	5	5	5	5	5	5	5	5	5	5	4	5	5	5	5	5	4	2	5	5	5	5
2020-03-29 13:14:53	student	Buet	Dhaka	Male	4	4	5	5	4	5	5	5	5	5	5	5	5	5	5	1	2	2	2	5	5	3	5	5	5	5	5	5	5	5	5	5	5	5	5	5	5	5	5	5	5	5	5	5	5
2020-03-29 13:16:14	Student	Jahangirnagar University	Savar, Dhaka	Female	5	4	4	5	5	5	5	5	5	5	5	5	5	5	5	1	1	1	2	5	5	5	4	5	5	5	5	5	5	3	5	5	5	5	5	5	5	5	4	5	3	5	5	5	5
2020-03-29 13:16:17	Student	Jahangirnagar University	Kallyanpu, Dhaka	Male	5	4	4	5	5	5	5	5	4	5	5	5	5	4	5	1	2	2	4	5	5	5	5	4	5	4	2	3	5	5	5	5	4	5	5	5	5	5	5	5	3	5	5	5	5
2020-03-29 13:19:57	Teacher	Primary School	Dhaka	Female	5	5	5	5	5	5	5	5	5	5	5	5	5	5	5	1	1	1	1	5	5	5	5	5	5	5	1	4	4	4	5	5	5	5	5	5	5	5	5	5	5	5	5	5	5
2020-03-29 13:20:43	student	northern international medical college	narayangonj	Male	1	2	1	5	5	5	5	5	3	5	5	4	4	3	4	4	3	4	4	3	4	3	4	4	3	4	5	5	5	5	5	5	5	4	3	4	4	4	4	4	4	5	5	5	5
2020-03-29 13:20:53	student	northern international medical college	narayangonj	Male	1	2	1	5	5	5	5	5	3	5	5	4	4	3	4	4	3	4	4	3	4	3	4	4	3	4	5	5	5	5	5	5	5	4	3	4	4	4	4	4	4	5	5	5	5
2020-03-29 13:21:02	Student	Begum Rokeya University, Rangpur	Rangpur	Male	5	4	4	5	5	5	5	5	5	5	5	5	5	5	5	2	3	2	3	4	5	4	5	5	5	5	5	5	5	4	4	5	5	5	5	4	4	5	5	5	4	5	5	5	5
2020-03-29 13:24:16	EHS Specialist	SGS BD LTD	DHAKA	Male	5	5	5	5	5	5	5	5	5	5	5	5	5	5	5	1	1	1	3	4	5	4	3	5	5	5	5	4	4	4	5	3	3	5	5	5	5	5	4	5	4	5	4	5	5
2020-03-29 13:24:26	Student	Pabna University of Science and Technology	Magura	Male	3	1	3	5	3	4	3	4	3	4	4	4	5	4	5	4	5	5	5	5	5	3	5	5	5	5	5	3	4	4	4	5	5	3	3	4	5	5	4	3	3	5	5	5	4
2020-03-29 13:25:08	Student	University of Dhaka	Ramna, Dhaka	Female	4	5	4	5	4	5	5	5	5	5	5	5	5	4	3	3	2	2	4	4	5	3	4	4	4	5	4	4	4	4	5	4	3	4	3	4	5	4	4	4	3	4	5	4	4
2020-03-29 13:25:43	student	Jahangirnagar University	Dhaka	Male	4	4	4	5	5	4	4	4	2	5	5	4	5	2	5	1	4	4	4	5	5	2	4	5	5	5	5	5	5	5	5	5	2	5	5	5	5	5	5	2	4	5	4	5	4
2020-03-29 13:26:05	Student	Jahangirnagar University	Dhaka	Male	4	2	2	3	4	3	5	3	5	5	5	5	5	5	3	4	4	3	3	3	5	2	1	5	5	5	5	5	5	5	5	5	5	5	5	5	5	5	5	5	3	5	3	5	5
2020-03-29 13:26:14	student	Bangladesh Agricultural University	Kushtia	Female	4	4	4	3	2	5	5	5	4	5	4	5	5	3	4	4	4	3	5	5	5	4	5	5	5	5	4	4	4	5	4	4	4	5	4	5	4	4	4	3	3	5	4	5	4
2020-03-29 13:26:39	Student	World University of Bangladesh	Dhaka	Male	5	4	5	5	4	5	4	4	5	5	5	5	5	2	5	2	4	2	4	5	5	3	5	4	4	4	4	3	2	3	3	4	3	4	4	5	5	5	3	3	3	4	4	5	4
2020-03-29 13:26:55	Student	Jahangirnagar University	Natore	Male	5	5	5	5	5	5	5	5	5	5	5	5	5	5	5	1	3	1	3	5	5	5	5	3	5	5	5	5	4	4	5	5	2	2	5	5	5	5	5	3	3	5	3	5	5
2020-03-29 13:27:48	Research	BCSIR	DHAKA	Female	4	4	4	4	4	4	5	4	2	5	4	4	5	4	4	4	4	3	2	4	5	3	4	5	4	4	4	4	3	4	4	3	3	3	4	3	4	4	3	4	4	5	3	4	4
2020-03-29 13:27:59	Student	KUET	Khulna	Male	5	5	4	4	4	5	5	5	5	5	5	5	5	5	5	1	1	1	4	5	5	4	5	5	5	5	5	5	5	5	5	5	5	5	5	5	5	5	5	5	5	5	5	5	5
2020-03-29 13:28:00	Student	JahangirnagarUniversity	Savar,dhaka	Male	4	4	4	3	1	4	5	4	5	4	4	4	3	2	3	3	5	4	5	5	4	5	5	5	5	5	4	4	4	4	4	5	1	3	3	4	4	4	4	2	3	5	4	5	5
2020-03-29 13:28:57	Alam Mahfuz	University Putra Malaysia	Malaysia	Male	4	5	4	5	5	1	1	2	1	1	1	2	1	2	1	1	2	3	3	3	3	3	5	5	5	5	4	5	5	5	5	5	4	4	3	3	4	5	5	5	5	5	3	5	5
2020-03-29 13:30:55	শিক্ষক (অবঃ)	কালীগ্রাম দোডাঙ্গী উচ্চ বিদ্যালয়	মান্দা, নওগাঁ বাংলাদেশ।	Male	4	4	3	4	4	4	4	4	3	4	4	4	4	4	5	3	3	2	4	4	4	4	4	4	4	5	5	3	4	4	5	3	3	3	3	4	4	4	4	2	3	5	4	4	3
2020-03-29 13:31:27	student	aust	Dhaka	Female	5	5	5	5	5	5	5	5	5	5	5	4	5	5	4	3	3	3	4	5	4	2	5	5	5	5	5	5	4	4	5	5	5	4	4	5	5	5	3	5	5	5	5	4	5
2020-03-29 13:32:04	Student	Begum Rokeya University, Rangpur	Rangpur	Male	3	4	4	5	3	5	5	4	4	5	4	5	5	4	4	2	3	2	4	5	5	4	4	4	4	5	4	4	4	5	5	4	3	5	3	5	4	5	4	3	4	5	4	4	4
2020-03-29 13:32:55	Student	MBSTU	Tangail	Female	5	5	5	5	4	4	4	5	5	5	5	4	5	4	5	1	4	3	3	4	5	4	5	4	4	5	5	3	4	5	5	4	4	4	4	5	5	5	5	4	3	5	4	4	4
2020-03-29 13:34:19	student	JU	Savar	Female	5	1	5	5	5	5	1	5	5	5	5	5	4	4	4	5	5	5	5	5	5	5	5	5	4	2	4	3	3	3	4	3	5	4	4	5	4	4	2	4	5	4	4	3	4
2020-03-29 13:35:49	Student	Jahangirnagar University	Dhaka	Female	5	3	3	4	5	4	4	5	3	5	4	5	5	2	5	4	1	1	4	4	4	3	4	4	5	5	5	5	5	5	5	5	5	4	5	5	5	4	5	5	3	5	5	5	5
2020-03-29 13:37:27	Student	Manarat International University	Dhaka, Bangladesh	Male	5	4	5	5	5	4	5	5	5	5	5	5	5	5	5	1	1	1	1	5	5	5	5	5	4	1	1	2	4	5	1	5	3	5	5	5	5	5	4	4	5	5	5	5	5
2020-03-29 13:37:43	Statistical officer	icddrb	Mohakhali, Dhaka	Male	5	5	5	5	5	5	4	5	5	5	5	5	5	5	5	2	1	1	2	5	5	2	4	5	5	5	4	4	4	5	5	5	5	5	5	5	5	5	5	5	5	5	4	4	4
2020-03-29 13:37:48	Student	Military institute of science and technology	Tejgaon	Female	5	5	5	5	3	3	4	4	3	3	3	5	5	5	4	2	2	2	4	4	4	4	5	5	4	5	5	5	5	5	5	4	3	5	5	5	5	5	5	5	3	5	4	4	5
2020-03-29 13:37:54	Retried Govt. Officer	Agrani Bank	Magura	Male	4	4	4	4	5	5	5	5	5	5	5	5	5	5	5	2	4	2	5	5	5	4	5	5	5	5	5	5	5	5	5	5	2	3	5	5	5	5	4	4	5	5	5	5	5
2020-03-29 13:38:10	Student	ICMAB	Boalmari,Faridpur, Dhaka	Male	3	2	1	2	3	5	5	5	5	5	5	5	5	3	5	1	5	3	5	5	3	5	5	5	5	5	5	5	5	5	5	5	5	5	4	5	5	5	5	2	3	4	5	5	5
2020-03-29 13:38:35	Student	Military Institute of Science and Technology	Dhaka	Male	4	4	5	4	4	5	5	5	5	5	5	5	5	5	5	1	3	2	3	5	5	3	5	5	5	5	5	5	4	4	5	3	4	5	5	5	5	4	4	5	4	5	5	5	5
2020-03-29 13:40:56	Student	Beijing normal University, china	Shariatpur	Male	5	4	5	5	5	5	5	5	4	5	5	5	5	4	5	1	1	1	2	5	5	4	5	5	5	5	5	5	4	5	5	5	4	5	5	5	5	5	5	5	4	5	4	5	5
2020-03-29 13:41:26	Student	J.U.	Savar	Male	5	5	5	5	5	5	5	4	5	5	5	5	5	4	5	5	3	3	4	5	5	4	5	5	4	5	5	5	5	5	5	5	5	5	3	4	4	4	5	5	3	5	5	5	5
2020-03-29 13:42:04	student	Faridpur Engineering College	Naogaon	Male	5	4	4	4	4	4	5	5	4	5	5	5	5	5	5	3	4	2	4	5	5	5	5	5	4	5	5	5	5	5	5	5	5	5	5	4	5	4	4	3	4	5	5	5	5
2020-03-29 13:43:06	Student	Begum Rokeya University Rangpur	Rangpur	Female	4	3	4	4	5	5	5	5	3	4	5	4	3	4	5	2	4	4	4	5	5	2	5	5	5	5	5	4	4	5	5	5	5	4	4	5	4	4	5	2	4	5	5	5	5
2020-03-29 13:49:30	Service holder	Youngone Corporation Ltd.	Chittagong	Male	5	5	5	5	5	5	5	5	5	5	5	5	5	5	5	1	2	3	3	5	5	3	5	5	5	5	5	5	5	5	5	5	5	4	4	3	4	4	5	4	5	5	4	5	5
2020-03-29 13:52:55	student	Rangpur Army Medical College	Now i am in Magura	Male	3	1	1	5	3	5	5	5	4	5	5	5	5	5	5	2	3	2	2	4	5	2	5	5	5	5	3	4	5	5	5	5	5	5	5	5	4	4	4	4	3	5	5	5	5
2020-03-29 13:54:39	Immigrant	Portugal Multicultural Academy	Lisboa	Male	5	4	4	5	5	5	5	5	5	5	5	5	5	4	5	1	2	2	3	5	5	5	5	5	5	5	5	5	5	3	4	4	1	5	5	5	5	5	5	3	3	5	5	5	3
2020-03-29 13:56:50	Private Service	eGeneration B2B Ltd	Dhaka	Male	3	4	5	5	4	5	5	5	5	5	5	5	5	5	5	3	4	3	4	5	5	3	5	5	5	5	5	5	5	3	5	5	5	4	3	3	4	5	5	3	4	5	4	5	5
2020-03-29 13:57:01	Banker	Prime Bank Limited	Dhaka	Male	5	4	5	4	5	1	3	3	3	4	3	3	3	5	4	2	2	1	2	3	4	4	5	5	5	5	5	5	5	5	5	5	4	4	5	3	4	4	5	3	5	5	5	5	5
2020-03-29 13:58:49	Student	JahangirnagarUniversity	Savar	Female	2	2	2	3	4	5	5	5	5	5	5	5	5	4	5	3	3	4	4	4	4	4	5	5	5	5	5	5	4	4	5	5	3	5	4	5	5	5	5	3	4	5	5	5	5
2020-03-29 13:59:00	Student	Daffodil International University	Dhaka	Male	4	5	3	5	4	1	5	4	2	2	2	4	5	5	5	1	3	3	3	5	5	2	4	3	5	5	5	4	5	4	5	4	5	5	4	5	4	5	5	5	3	2	5	3	4
2020-03-29 13:59:36	Student	Jahangirnagar University	Dhaka	Female	5	4	4	5	5	2	4	5	4	2	3	5	5	4	5	4	4	4	5	4	5	5	5	4	5	5	5	4	4	5	5	5	4	3	3	4	4	4	4	4	5	5	5	5	5
2020-03-29 14:00:11	Student	Jahangirnagar University	Savar Dhaka	Male	4	3	4	3	5	2	4	3	4	5	4	5	5	4	5	5	4	3	3	5	4	2	5	5	5	5	4	3	3	4	5	5	2	3	3	3	5	5	2	2	2	3	3	4	4
2020-03-29 14:03:15	Student	Jahangirnagar University	Savar, Dhaka	Female	5	5	5	5	5	5	5	5	5	5	5	5	5	5	5	1	1	1	1	5	4	4	5	5	5	5	5	5	4	5	5	5	5	4	5	5	5	5	5	5	3	5	5	5	5
2020-03-29 14:03:49	Software Engineer	MJL Bangladesh LTD	Dhaka	Male	5	4	4	4	5	5	4	5	4	4	5	5	5	5	5	1	2	1	3	5	5	4	5	4	5	5	5	5	4	5	5	2	3	5	5	4	5	4	3	4	3	5	3	4	4
2020-03-29 14:03:55	Student	Jahangirnagar University	Savar,Dhaka	Male	5	3	5	5	4	5	5	5	5	5	5	5	5	5	5	3	3	4	5	5	5	5	5	5	3	5	5	5	5	5	5	5	3	4	5	4	5	5	5	5	3	5	5	5	5
2020-03-29 14:04:27	Student	Hamidpur Alhera college,jessore	Boalmari,faridpur	Male	4	4	4	4	4	4	1	5	5	5	4	4	5	5	5	5	4	5	5	4	5	5	5	5	4	5	5	5	5	4	5	5	5	5	4	3	5	4	5	1	4	4	5	5	5
2020-03-29 14:06:12	Academician	University of Dhaka	Dhaka	Male	4	1	4	3	4	5	5	5	5	5	5	5	5	4	5	3	4	2	2	5	5	3	4	5	5	5	4	4	4	4	4	4	4	5	4	5	4	4	4	4	4	5	3	3	2
2020-03-29 14:06:22	Student	Jahangirnagar University	Savar, Dhaka	Male	4	5	5	4	5	3	5	5	5	5	5	5	5	4	5	1	1	1	3	4	5	4	4	5	4	5	5	4	5	5	5	5	2	4	3	5	5	5	5	5	3	5	5	5	3
2020-03-29 14:08:14	Student	Mist	Dhaka	Female	4	2	5	5	3	5	5	5	5	5	5	5	5	5	5	1	3	1	4	5	5	4	4	5	5	5	5	5	5	5	5	5	5	5	5	5	5	4	5	5	3	5	5	5	5
2020-03-29 14:08:49	Student	Daffodil International University	Dhanmondi-27	Female	5	5	5	5	5	5	5	5	4	5	5	5	5	5	5	4	4	1	2	4	4	2	4	5	4	5	5	4	5	5	4	5	2	5	5	5	5	5	4	4	4	5	4	5	5
2020-03-29 14:08:57	Student	Jahangirnagar University	Bogura	Male	5	4	2	5	5	4	4	4	4	4	5	4	5	3	4	3	3	4	4	4	3	4	4	3	4	4	4	4	4	4	4	4	4	4	4	4	3	4	3	4	4	3	4	4	3
2020-03-29 14:09:03	Student	Kushtia Government College	Kushtia	Female	5	5	5	5	5	5	4	5	5	5	4	4	4	4	5	4	5	5	4	5	4	4	5	5	4	5	4	4	4	4	5	5	4	4	5	3	4	4	4	3	4	4	4	4	3
2020-03-29 14:12:16	Banker	Ansar vdp unnyon bank	Dhaka	Male	3	3	5	4	5	5	5	5	5	5	5	5	5	3	5	3	2	2	3	5	5	3	5	5	5	5	5	5	5	4	5	5	5	5	4	5	5	5	5	5	3	4	5	5	5
2020-03-29 14:14:58	Student	Jahangirnagar University	Rajshahi	Male	2	4	5	3	3	2	5	2	4	3	4	4	5	1	3	4	5	4	5	5	3	1	4	5	4	3	4	5	2	4	2	5	4	4	4	4	4	4	2	1	2	2	3	5	5
2020-03-29 14:15:11	Research Assistant	IWFM, BUET	POLASHI	Female	3	4	5	2	4	5	3	5	3	5	4	5	5	1	5	2	1	1	2	4	5	3	5	5	4	5	4	4	3	4	5	3	4	5	5	5	5	3	2	5	3	3	3	4	4
2020-03-29 14:18:36	Student	JahangirnagarUniversity	Sherpur	Female	4	4	4	5	4	5	4	5	5	5	5	5	5	3	4	1	1	1	2	4	4	4	5	5	5	5	4	4	4	5	5	5	5	5	4	5	5	5	3	3	3	4	5	5	5
2020-03-29 14:18:53	Student	Bangladesh University of Engineering and Technology	Mirpur-1	Male	4	4	4	4	4	5	5	5	5	5	5	5	5	5	5	1	1	1	2	5	5	4	5	4	4	5	4	3	4	5	5	5	2	5	5	5	5	5	5	5	5	5	5	5	5
2020-03-29 14:21:03	Student	Pabna University of Science and Technology	Dhaka	Male	5	4	5	5	5	5	5	5	5	5	5	5	5	5	5	1	3	2	4	5	5	2	5	5	5	5	4	4	2	2	5	5	5	4	4	5	5	5	4	1	4	5	3	5	5
2020-03-29 14:23:40	Student	BU	Faridpur	Male	5	3	3	3	3	5	5	5	5	5	5	5	5	3	5	3	2	2	2	5	5	3	5	5	5	5	5	5	4	5	3	3	3	5	3	5	5	5	3	3	3	5	5	5	5
2020-03-29 14:23:46	Student	BU	Faridpur	Male	5	3	3	3	3	5	5	5	5	5	5	5	5	3	5	3	2	2	2	5	5	3	5	5	5	5	5	5	4	5	3	3	3	5	3	5	5	5	3	3	3	5	5	5	5
2020-03-29 14:23:56	Student	University of Asia Pacific	Farmgate	Female	5	4	5	5	5	5	5	5	4	5	5	4	5	5	5	2	1	1	3	4	5	3	5	5	5	5	5	5	5	5	5	4	4	4	5	5	5	5	5	5	4	5	5	5	5
2020-03-29 14:25:25	Officer cadet	Bangladesh Military Academy	Bhatiary , Chattogram	Male	4	3	4	5	4	4	4	5	5	5	5	5	5	4	3	3	5	3	4	5	5	2	4	5	5	5	5	2	2	5	4	4	1	1	5	5	5	4	3	3	2	5	5	5	5
2020-03-29 14:25:50	Teaching	Begum Rokeya University, Rangpur	Rangpur	Male	5	1	5	1	1	5	3	1	3	3	3	4	5	1	3	1	1	1	3	5	5	3	5	5	4	1	3	4	4	3	5	4	3	5	3	3	5	4	5	5	3	4	4	4	4
2020-03-29 14:26:16	Student	JU	Mohammadpur	Male	3	4	4	3	5	5	5	5	4	4	4	5	5	4	5	4	4	4	5	4	5	5	5	5	4	5	5	5	5	5	5	4	3	4	5	4	4	5	4	5	4	5	4	4	4
2020-03-29 14:26:29	Student	Jahangirnagar University	Savar, Dhaka	Female	5	4	5	5	4	3	4	4	5	5	5	5	5	4	5	4	4	4	3	5	5	3	4	5	4	5	5	5	5	5	5	5	5	3	3	5	5	5	5	3	3	5	4	5	5
2020-03-29 14:26:54	Student	Faridpur engineering college	Barisal	Male	3	3	3	2	5	4	3	5	4	5	2	4	5	5	5	2	2	2	4	4	5	5	4	5	5	5	5	5	5	5	5	5	4	5	5	5	5	5	2	4	3	5	5	4	5
2020-03-29 14:28:14	Student	Hamidpur Alhera college,jessore	Boalmari,faridpur	Male	4	4	4	4	4	4	1	5	5	5	4	4	5	5	5	5	4	5	5	4	5	5	5	5	4	5	5	5	5	4	5	5	5	5	4	3	5	4	5	1	4	4	5	5	5
2020-03-29 14:29:39	Student	Jahangirnagar University	Savar, Dhaka - 1342	Male	4	2	4	4	4	5	5	4	4	4	5	4	4	5	4	2	2	2	2	5	5	2	5	4	4	5	2	4	4	4	4	4	4	4	4	4	5	5	5	5	4	5	4	4	5
2020-03-29 14:29:19	Student	JahangirnagarUniversity	Azimpur Dhaka	Male	2	2	1	3	3	3	3	3	3	3	2	2	3	3	2	3	2	3	2	2	3	2	3	3	2	3	2	3	3	2	1	1	2	3	2	1	2	2	3	2	2	2	2	3	2
2020-03-29 14:30:06	Student	Jahangirnagar University	Mirpur-1,Dhaka	Male	5	4	5	5	5	5	5	5	5	5	5	5	5	4	5	3	4	3	4	5	5	4	5	4	5	5	5	5	5	5	5	5	4	4	3	5	5	5	4	4	5	5	5	5	4
2020-03-29 14:30:54	student	national university	sylhet	Male	4	2	5	5	3	1	3	5	5	1	5	4	5	5	5	1	1	2	3	5	5	5	1	5	4	5	5	5	3	2	5	5	3	5	5	5	2	5	4	5	5	5	5	5	5
2020-03-29 14:31:04	Student	Jahangirnagar University	Tangail	Female	3	3	4	4	4	2	3	5	5	3	3	4	5	5	4	3	4	4	4	5	4	3	4	5	5	5	5	4	4	2	5	4	3	3	4	4	5	4	3	3	5	5	5	4	5
2020-03-29 14:31:35	Student	Faridpur Engineering College	Faridpur	Male	3	2	2	4	3	3	5	4	4	5	5	5	5	1	5	3	4	5	4	5	5	3	3	5	5	3	5	5	5	5	5	5	5	3	3	5	3	5	4	3	4	5	5	5	5
2020-03-29 14:31:57	student	jahangirnagar university	faridpur	Female	4	3	4	4	5	5	5	5	5	5	5	5	5	4	5	2	2	2	3	5	5	3	5	5	5	5	5	5	5	5	5	5	4	5	5	5	5	5	5	5	4	5	5	5	5
2020-03-29 14:33:16	Student	Jahangirnagar University	Mirpur_1,Dhaka	Male	4	4	4	3	4	5	5	5	5	5	5	5	5	2	3	4	3	2	4	5	5	4	5	4	4	5	4	5	2	5	5	5	2	5	5	5	5	5	5	2	4	5	5	5	4
2020-03-29 14:33:44	Student	Jahangirnagar University	Manikgonj	Female	4	4	4	2	3	2	5	5	4	5	5	4	5	4	5	2	4	3	1	5	5	5	5	4	4	5	4	4	4	4	5	4	1	4	4	5	5	4	4	1	5	5	5	5	4
2020-03-29 14:34:14					1	2	2	3	1	1	1	3	4	1	1	2	1	2	2	3	2	3	1	3	2	1	4	4	3	4	5	4	4	4	4	4	1	4	3	5	3	4	3	3	2	4	3	4	3
2020-03-29 14:34:27					1	2	2	3	1	1	1	3	4	1	1	2	1	2	2	3	2	3	1	3	2	1	4	4	3	4	5	4	4	4	4	4	1	4	3	5	3	4	3	3	2	4	3	4	3
2020-03-29 14:44:22	sStudent	Begum RokeyaUniversityRangpur	Rangpur	Female	4	4	4	4	5	4	4	5	4	5	5	4	4	4	4	1	4	4	4	4	4	4	5	4	4	5	5	4	4	4	5	5	4	4	4	4	4	4	4	4	4	5	4	5	5
2020-03-29 14:44:33	Student	Rajshahi Govt Women's College	Rajshahi	Female	5	5	5	5	4	4	5	5	5	5	5	5	5	5	5	1	3	1	3	5	5	4	5	3	3	5	5	3	5	5	5	5	1	5	5	5	5	5	5	3	3	5	5	5	5
2020-03-29 14:45:32	Consultant	ICIMOD	Agargaon, Dhaka	Female	5	5	5	5	5	4	5	5	4	5	5	3	4	5	5	5	4	2	4	5	5	4	5	5	5	5	4	4	5	3	5	4	4	4	5	4	5	5	5	3	3	5	5	5	5
2020-03-29 14:45:59	Student	Jahangirnagar University	Savar Dhaka	Female	5	5	5	5	5	5	5	5	3	5	5	5	5	5	5	1	1	1	3	5	5	3	5	5	5	5	5	5	5	5	5	5	5	5	5	5	5	5	5	5	5	5	5	5	5
2020-03-29 14:46:49	Private Job	Comfit Composite knit Ltd	Gorai, Mirzapur, Tangail	Male	5	3	3	5	5	5	5	5	5	5	5	5	5	3	5	4	3	3	4	5	5	2	5	5	5	5	5	5	1	1	3	5	3	5	3	5	5	5	5	3	2	5	2	5	3
2020-03-29 14:48:00	Medical Student	Rangpur Army Medical College	Rangpur, Bangladesh	Male	4	4	2	3	4	3	4	4	5	4	5	5	5	4	5	3	4	3	3	4	5	3	4	4	4	5	4	4	5	5	5	4	3	4	3	5	4	4	4	3	3	4	4	4	4
2020-03-29 14:55:00	Lecturer	University of Creative Technolog. Chittagong	Chittagong	Female	4	4	4	5	3	4	4	4	5	5	5	4	4	4	5	4	4	4	3	5	5	4	4	4	3	3	3	3	3	3	4	4	3	5	5	5	5	5	4	4	3	5	3	4	4
2020-03-29 14:56:29	Private Service	MNC company	Dhaka, Bangladesh	Male	5	4	5	5	5	5	5	4	4	5	5	5	5	5	4	4	4	2	3	5	5	3	5	5	5	4	4	4	4	4	4	3	4	4	4	4	4	4	4	5	3	5	5	4	4
2020-03-29 14:58:46	Consultant	Icimod	Forest Department Bangladesh	Female	5	5	5	4	5	5	5	5	5	5	5	4	5	5	5	2	2	1	2	4	5	4	5	4	3	5	5	3	4	3	5	3	4	3	4	5	5	5	5	5	3	4	3	4	3
2020-03-29 14:59:14	Customer communication executive	Mashruba Medical technology	Dhanmondi	Female	5	5	5	1	4	4	4	4	4	4	4	4	4	4	4	4	4	4	4	4	4	4	5	4	4	4	4	5	4	5	4	5	4	4	4	4	4	4	5	4	4	4	4	5	4
2020-03-29 14:59:25	Student	Jahangirnagr University	Savar, Dhaka -1342	Male	3	3	4	4	4	4	5	4	4	4	4	4	5	4	4	3	4	3	3	5	4	4	4	4	4	4	4	4	4	4	4	5	5	3	3	3	4	4	4	3	4	4	4	5	5
2020-03-29 15:00:12	Student	Barisal University	Barisal	Male	4	3	4	4	5	4	4	5	4	4	5	4	5	4	5	4	4	4	4	4	4	4	5	5	4	4	5	4	4	4	4	4	4	4	4	4	4	4	4	4	4	4	5	4	4
2020-03-29 15:04:27	Student	Jahangirnagar university	Savar ,Dhaka	Male	4	4	4	5	5	5	5	4	2	5	5	5	5	3	5	2	2	2	2	4	5	4	5	5	5	5	5	5	5	5	5	5	5	5	5	5	5	5	5	4	2	5	5	5	5
2020-03-29 15:05:31	Student	Jahangirnagar university	Mirpur	Female	4	4	5	4	5	5	5	5	5	5	5	5	5	5	5	1	1	1	1	5	5	3	4	5	5	5	5	5	5	5	5	5	5	5	5	5	5	5	4	5	5	5	5	5	5
2020-03-29 15:07:16	Student	Jahangirnagar University	Sirajganj	Female	5	4	4	5	5	5	5	5	4	5	5	4	5	2	4	4	2	3	4	5	5	4	4	5	5	5	3	4	5	5	5	5	5	5	4	5	5	3	5	5	3	5	5	5	5
2020-03-29 15:10:08	Lecturer	Bangabandhu Sheikh Mujibur Rahman Science and Technology University	Gopalganj	Female	5	5	5	5	5	4	5	5	4	5	5	5	5	5	5	2	5	2	4	5	5	4	5	5	5	5	5	5	5	5	5	5	5	5	5	5	5	5	4	3	5	5	5	5	5
2020-03-29 15:11:19	Civil Engineer		Dhaka	Male	1	1	2	3	4	3	5	4	4	5	5	3	5	5	5	5	2	1	2	5	4	1	4	5	5	5	4	5	5	5	5	3	3	5	3	5	5	5	4	4	5	5	5	5	3
2020-03-29 15:13:55	Student	JahangirnagarUniversity	Bogura	Male	5	4	5	4	5	5	5	5	4	5	5	4	5	4	5	2	1	1	3	4	5	4	4	4	3	5	5	5	4	5	5	3	4	5	5	5	5	5	2	5	2	5	3	4	4
2020-03-29 15:16:23	Student	Jahangirnagar University	Savar, Dhaka	Male	4	4	5	4	5	5	5	4	4	4	4	5	5	4	4	2	4	4	5	5	5	2	4	5	5	5	5	4	4	5	5	5	4	4	3	4	4	4	4	2	4	4	5	4	4
2020-03-29 15:16:32	Student	Jahangirnagar University	Savar, Dhaka	Male	4	4	5	4	5	5	5	4	4	4	4	5	5	4	4	2	4	4	5	5	5	2	4	5	5	5	5	4	4	5	5	5	4	4	3	4	4	4	4	2	4	4	5	4	4
2020-03-29 15:17:43	Student	Begum Rokeya University, Rangpur	Gaibandha	Male	3	4	4	5	5	1	5	5	5	5	5	5	5	4	5	1	2	2	4	5	5	2	5	4	5	5	4	5	4	5	5	5	4	5	2	5	4	5	5	5	5	5	3	5	5
2020-03-29 15:18:42	student	Jahangirnagar University	savar,dhaka	Male	5	5	4	1	4	4	4	5	5	4	4	4	4	4	4	2	4	3	3	4	4	4	5	4	4	5	4	4	4	4	4	4	4	4	4	3	2	2	5	1	2	4	3	4	2
2020-03-29 15:19:37	Student	Gono Bishwabidyalay	Boalmari Faridpur	Male	3	1	5	2	3	4	5	4	5	3	3	5	5	5	5	5	5	5	5	5	5	5	5	5	3	5	5	5	5	5	5	3	5	5	1	2	2	1	3	1	5	5	5	5	3
2020-03-29 15:19:59	Teaching	Chattogram Veterinary and Animal Sciences University	Chattogram 4225	Female	5	4	5	5	5	5	5	5	5	5	5	5	5	5	5	2	2	1	3	4	5	3	4	5	5	5	5	5	5	5	5	5	4	5	4	5	5	5	3	3	3	5	4	5	5
2020-03-29 15:20:48	Housewife		Mirpur 1 , Dhaka 1216	Female	4	3	4	4	5	5	1	4	5	5	5	5	4	4	5	5	2	5	4	5	5	2	2	5	5	5	5	5	5	5	5	2	5	5	5	5	4	5	3	5	2	5	5	5	5
2020-03-29 15:26:30	Intern	Asiatic EXP	Banani Dhaka	Male	5	3	4	5	3	5	5	4	4	5	5	4	5	3	4	1	2	1	4	4	5	3	5	4	5	5	4	4	4	5	4	3	4	4	5	4	5	4	4	5	3	5	3	5	4
2020-03-29 15:29:40	Student	Jahangirnagar University		Female	5	2	5	4	5	5	4	4	3	5	5	4	5	5	3	3	3	2	5	5	5	2	5	5	5	5	2	5	4	5	5	5	1	4	3	5	5	4	4	4	1	5	5	5	5
2020-03-29 15:29:54	student	Begum Rokeya University,Rangpur	Rangpur	Female	4	4	4	3	4	4	4	5	4	5	4	4	5	5	5	3	2	3	3	4	5	4	4	5	4	5	5	4	5	4	5	5	3	3	3	5	4	4	4	4	4	4	5	4	5
2020-03-29 15:30:07	Private Service	Credence Housing Ltd	Dhaka	Male	2	2	2	1	2	3	3	2	3	4	4	4	4	4	4	2	2	2	4	4	3	5	4	4	5	5	5	5	5	5	5	5	5	4	3	4	4	4	3	3	4	5	5	5	4
2020-03-29 15:30:27	Student	Jahangirnagar University	Baliakandi, Rajbari	Male	5	5	5	5	5	5	5	5	5	5	5	5	5	5	5	5	1	1	2	5	5	5	5	5	5	5	5	5	5	5	5	5	5	3	1	5	5	5	5	5	5	5	5	5	5
2020-03-29 15:30:36	Deputy Manager	BRAC	Dhaka	Female	2	2	2	3	5	2	5	4	4	4	5	5	4	5	5	4	4	4	4	5	4	4	4	5	5	5	5	4	5	5	5	5	4	4	3	4	3	4	4	4	4	5	5	5	5
2020-03-29 15:31:23	Student	Begum Rokeya University Rangpur	Park Mor	Male	4	4	5	2	5	5	5	5	4	5	5	5	5	5	5	3	1	1	2	3	5	3	5	5	5	5	5	5	5	5	5	5	5	5	5	5	5	5	5	5	3	5	5	5	5
2020-03-29 15:32:22	Student	Bir shreshtha Noor Mohammad Public College	Dhaka,Bangladesh	Female	3	3	4	5	1	5	2	5	5	5	5	5	5	5	5	3	2	1	2	5	5	2	5	4	4	5	5	5	5	5	5	4	3	3	4	5	5	5	3	3	4	5	5	5	4
2020-03-29 15:33:26	Student	Jahangirnagar University	Bera , Pabna	Male	4	4	5	3	3	5	4	5	5	5	5	5	5	5	5	3	2	1	2	5	5	3	4	5	4	5	3	4	4	4	4	5	4	5	5	5	5	5	4	3	4	4	5	4	4
2020-03-29 15:33:58	Students	Jahangirnagar University	Savar	Male	5	4	5	5	2	5	5	5	5	5	5	5	5	5	5	1	1	2	2	5	5	4	5	5	5	5	5	5	5	5	5	5	3	5	5	5	5	5	3	5	4	5	4	5	4
2020-03-29 15:35:25		Student	Rangpur, Bangladesh.	Male	3	3	2	3	4	3	5	4	4	4	5	5	5	5	5	2	2	1	1	5	5	4	5	4	4	5	5	5	5	5	5	5	3	3	4	5	5	5	5	3	4	5	4	4	4
2020-03-29 15:36:40	Student	Jahangirnagar University	Jahangirnagar University,Savar,Dhaka.	Female	5	4	5	4	4	4	4	5	4	4	5	3	4	2	4	4	4	2	4	4	5	4	3	5	5	5	4	4	4	4	4	4	2	4	4	4	4	4	5	3	5	5	5	5	5
2020-03-29 15:37:01	Jr. Co Ordinator	Solasta	Mirpur	Male	5	5	5	5	5	1	5	5	4	5	5	5	5	1	5	5	2	2	2	5	5	4	5	5	5	5	3	5	1	4	5	5	1	5	5	5	5	5	5	3	3	5	3	5	5
2020-03-29 15:37:21	Student	Begum Rokeya University	Mithapukur,rangpur	Male	4	5	5	3	4	4	5	5	4	5	2	5	5	5	5	1	1	1	3	3	5	4	5	5	5	5	3	5	3	5	5	4	3	3	5	3	5	5	4	5	5	5	3	5	5
2020-03-29 15:37:26	Student	Jahangirnagar University	Savar	Male	5	5	4	5	5	5	5	5	5	5	5	5	5	3	5	3	3	1	3	3	5	3	5	5	5	5	5	5	4	5	5	5	5	4	3	5	5	5	5	5	4	5	5	5	5
2020-03-29 15:37:33	Unemployed		Rangpur	Male	3	4	4	4	5	2	5	5	5	4	5	5	4	5	5	3	5	3	4	5	5	3	5	5	5	3	4	3	4	4	5	5	4	5	3	4	5	5	4	3	5	5	4	5	5
2020-03-29 15:38:36	student	Dhkaka university	Brahmanbaria	Male	4	3	3	4	5	3	4	4	3	3	3	3	3	3	3	3	3	3	3	3	3	3	3	3	3	3	3	3	3	3	3	3	3	3	3	3	3	3	3	3	3	3	3	3	3
2020-03-29 15:41:48	Student	Noakhali Science & Technology University	Chattagram	Male	4	3	5	3	5	5	5	4	3	5	5	5	5	5	4	2	2	1	5	5	4	3	3	5	4	5	4	3	4	5	5	5	5	5	5	5	5	5	5	5	4	5	4	5	5
2020-03-29 15:42:30	Student	Milestone College	Rampura,Dhaka	Male	3	2	2	3	1	4	4	4	5	5	5	4	5	5	5	1	1	1	1	5	4	4	5	4	4	5	4	5	5	5	5	5	5	4	5	3	5	3	4	5	5	5	5	5	5
2020-03-29 15:42:35	Student	Milestone College	Rampura,Dhaka	Male	3	2	2	3	1	4	4	4	5	5	5	4	5	5	5	1	1	1	1	5	4	4	5	4	4	5	4	5	5	5	5	5	5	4	5	3	5	3	4	5	5	5	5	5	5
2020-03-29 15:44:50	Teaching	Oxford International School	Road,27,Dhanmondi, Dhaka	Female	5	4	5	5	4	5	5	5	4	5	5	4	5	5	5	1	1	2	3	5	5	3	5	4	5	5	4	4	4	5	4	4	4	5	5	5	4	4	4	4	5	5	4	5	5
2020-03-29 15:45:00	student	cu	feni	Female	5	5	5	5	5	5	5	5	5	5	5	5	5	5	5	1	1	1	4	4	4	3	4	4	5	5	5	5	5	5	5	5	5	5	5	5	5	5	5	3	3	4	4	5	5
2020-03-29 15:46:35	Student	Jahangirnagar university	Savar, Dhaka-1342	Male	1	1	1	5	1	1	5	5	5	5	5	5	5	5	5	1	5	5	5	5	5	1	5	5	5	5	5	5	5	5	5	5	1	1	5	5	5	5	5	5	1	5	5	5	5
2020-03-29 15:47:52	student	Jahangirnagar University	Dhaka	Female	4	5	5	4	5	5	5	5	3	5	5	5	5	4	5	3	4	2	3	5	5	3	5	5	5	5	5	5	5	4	5	5	5	5	5	5	5	5	4	5	4	5	5	5	5
2020-03-29 15:49:35	Teacher	Bangladesh protibondhi foundation	Mirpur 2	Female	3	3	3	3	3	3	3	3	3	3	3	3	3	3	3	3	3	3	3	3	3	3	3	3	3	3	3	3	3	3	3	3	3	3	3	3	3	3	3	3	3	3	3	3	3
2020-03-29 15:54:15	Student	Jahangirnagar University	Chittagong	Male	3	3	4	5	5	3	3	5	5	5	5	4	5	5	5	2	4	5	4	5	4	4	3	3	5	5	4	4	5	4	5	4	4	4	4	3	4	5	4	4	3	5	4	5	5
2020-03-29 15:56:07	Student	Jahangirnagar University	Savar, Dhaka	Male	2	2	4	1	3	5	5	5	5	5	5	5	5	4	5	4	5	2	4	5	5	5	5	5	3	5	3	2	3	2	5	5	5	5	5	5	5	5	5	3	5	5	4	4	4
2020-03-29 15:56:52	Student	Jahangirnogor university	Savar	Female	5	4	5	2	4	5	5	5	5	5	5	5	5	5	4	4	1	1	3	5	5	3	5	5	5	5	5	5	3	5	5	3	3	5	5	5	5	5	5	5	3	5	4	5	5
2020-03-29 15:57:33	Teaching	Jahangirnagar University	Dhaka	Female	5	5	5	5	5	5	3	4	3	5	5	5	5	4	5	4	3	3	3	5	5	4	5	5	5	5	5	5	5	5	5	5	5	5	5	5	5	5	5	3	3	5	4	5	5
2020-03-29 15:57:51	Service	Government	Dhaka	Male	5	4	4	1	4	3	5	5	5	5	5	5	5	5	5	1	1	2	5	5	3	2	5	4	5	4	3	3	2	3	3	4	4	5	5	5	5	4	4	5	4	5	4	5	3
2020-03-29 15:58:17	Banker	Jamuna Bank Limited	Motijheel	Male	4	4	4	4	4	5	4	4	5	5	4	5	4	5	4	2	4	2	4	5	5	4	4	5	4	4	4	4	4	4	4	4	4	4	4	5	4	5	4	2	4	4	5	4	5
2020-03-29 16:01:49	Student	Barishal University	Boalmari, Faridpur	Female	5	5	5	4	4	5	5	5	5	5	5	5	5	5	5	4	5	5	3	5	5	5	4	5	5	5	5	5	5	5	5	5	4	5	5	5	5	5	5	3	5	5	5	5	5
2020-03-29 16:02:00	Service holder	Leadership& Sustainability	Badda,link Road,Dhaka-Bangladesh	Female	3	4	3	5	2	5	5	5	3	5	5	5	5	5	5	2	2	3	4	5	5	3	5	5	5	5	3	5	2	3	5	4	5	5	5	5	5	5	5	3	4	4	5	5	4
2020-03-29 16:03:06	Student	Jahangirnagar University	Jahangirnagar Savar Dhaka	Male	5	5	5	4	4	4	4	5	5	2	5	4	5	5	5	2	2	1	1	5	5	4	5	5	5	5	5	5	4	5	5	5	5	5	5	5	5	5	5	5	5	5	4	4	4
2020-03-29 16:03:35	Student	Noakhali Science and Technology University	Feni	Male	5	4	4	5	5	5	5	5	5	5	5	5	5	4	5	1	4	2	4	5	5	3	5	5	4	5	4	4	4	4	4	4	2	5	4	5	5	5	5	2	4	5	5	5	5
2020-03-29 16:03:53	Student	Begum Rokeya University, Rangpur	Pirgachha, Rangpur	Male	5	4	4	5	5	4	5	4	3	4	5	4	5	3	3	4	4	5	4	4	5	4	5	5	4	4	4	1	2	2	4	4	4	4	4	5	2	4	4	1	5	4	5	4	4
2020-03-29 16:04:50	student	Faridpur Engineering College	Dhaka	Male	4	3	4	2	4	5	5	4	4	5	4	5	5	4	5	1	2	2	4	5	4	4	5	5	5	5	5	4	4	4	4	5	2	4	5	5	4	4	4	4	4	5	4	5	5
2020-03-29 16:05:21	Private Service	FCI Group	Savar Dhaka	Male	5	5	5	5	5	5	5	4	3	5	5	5	5	5	5	1	1	1	1	3	5	3	5	5	5	5	5	5	4	5	5	5	5	5	5	5	5	5	5	5	5	5	5	5	5
2020-03-29 16:10:24	Student	BRUR	Kurigram	Female	5	5	4	5	5	4	5	5	5	5	5	5	5	5	5	5	4	4	4	5	5	5	5	4	4	5	5	5	5	4	5	5	5	5	5	5	5	5	5	4	4	5	5	4	4
2020-03-29 16:12:14	Student	Jahangirnagar University	Savar	Male	5	4	5	5	5	5	4	5	3	5	5	5	5	5	5	3	4	3	5	5	5	3	5	5	5	5	5	3	4	3	5	5	5	5	5	5	5	5	5	5	5	5	5	5	5
2020-03-29 16:18:41	Student	Motgari High School	Naogaon	Male	5	1	1	3	5	5	5	5	4	2	5	4	5	3	3	4	5	4	5	5	5	4	2	4	5	5	5	4	4	5	4	5	5	4	5	3	5	5	4	3	2	4	4	3	3
2020-03-29 16:18:44	Student	Jahangirnagar University	Savar, Dhaka	Male	4	5	4	5	5	2	5	4	4	5	2	4	5	4	4	4	4	2	4	5	4	4	5	5	5	5	2	4	4	4	5	5	2	4	2	4	4	4	4	2	2	5	2	4	4
2020-03-29 16:19:17	Student	JahangirnagarUniversity	Savar	Female	5	3	5	5	5	5	5	5	5	5	5	5	5	5	5	2	2	1	2	5	5	3	5	4	5	5	5	5	5	5	5	4	3	3	5	5	5	5	3	4	2	5	5	5	5
2020-03-29 16:22:20	Software Engineer	Battery Low Interactive Ltd.	Dhaka	Male	3	3	4	4	4	5	4	4	5	4	5	5	4	2	5	3	2	1	2	5	5	3	4	5	5	5	4	5	4	5	4	4	4	4	4	4	5	5	4	4	3	5	4	4	4
2020-03-29 16:22:38	Pvt. Job	JTI	Chattogram	Male	5	4	4	5	4	5	3	5	4	5	5	5	5	5	5	2	3	1	3	5	5	2	4	4	4	5	2	4	5	4	5	4	5	5	4	5	5	4	4	4	4	2	4	4	4
2020-03-29 16:23:43	Student	National Institute of Textile Engineering And research	Dhaka	Male	5	5	5	5	5	5	5	5	5	5	5	5	5	5	5	5	2	1	2	5	5	3	5	5	5	5	5	5	5	5	5	5	5	5	4	5	5	5	5	3	3	5	5	5	5
2020-03-29 16:25:09	Student	Jahangirnagar University	Moulvibazar,Sylhet	Female	5	4	5	3	4	5	4	4	5	5	5	5	5	1	5	1	1	1	2	4	5	4	4	5	5	5	5	5	5	5	5	5	5	5	5	5	5	5	5	5	5	5	5	5	5
2020-03-29 16:25:53	Student	MIST	MIRPUR	Male	3	1	1	2	3	2	2	3	3	3	3	3	3	3	3	3	3	3	3	3	3	3	3	3	3	3	3	3	3	3	3	3	3	3	3	3	3	3	3	3	3	3	3	3	3
2020-03-29 16:26:06	Student	Jahangirnagar University	Habiganj	Male	3	2	3	3	5	4	4	5	4	4	4	4	5	5	5	2	3	3	2	4	5	2	5	5	5	5	5	4	4	5	5	5	3	4	3	5	5	5	4	5	4	4	5	4	4
2020-03-29 16:27:57	Student	Faridpur engineering College	Feni	Male	5	5	5	5	5	4	4	5	5	5	5	5	5	5	5	1	3	1	3	5	5	1	5	1	1	5	5	5	5	5	5	1	5	5	2	5	3	5	5	2	3	3	4	4	2
2020-03-29 16:29:51	Student	Begum Rokeya University, Rangpur	Salamer more, parker more, Rangpur. My Current location: Bokhtiarabad, Sopura, Boalia,Rajshahi	Female	3	4	5	4	4	4	4	5	4	5	4	4	5	5	3	3	4	2	4	5	3	5	5	5	5	5	5	4	3	2	4	5	3	4	3	4	4	4	4	2	3	5	4	5	3
2020-03-29 16:32:25	Student	University of Dhaka	Lalbagh, Dhaka	Male	4	4	5	5	5	5	5	5	5	5	5	5	5	5	5	1	3	1	2	5	5	4	5	5	5	5	5	5	5	4	5	5	4	5	4	5	5	5	4	4	4	5	4	5	5
2020-03-29 16:39:04	Unemployed	Jahangirnagar University	Savar, Dhaka	Male	5	5	5	4	4	5	4	5	5	5	5	5	5	5	4	1	2	2	2	4	4	4	4	4	3	5	4	3	4	4	4	3	4	4	4	5	4	5	5	4	3	4	3	3	3
2020-03-29 16:42:45	Student	Jashore University of Science and Technology	Jashore	Male	5	5	5	5	5	5	5	4	5	5	5	5	5	5	5	1	2	3	3	5	5	4	4	5	5	5	5	5	5	5	5	4	5	4	4	5	5	5	4	5	5	5	5	5	5
2020-03-29 16:43:28	Student	MIST	Palashi	Female	3	3	3	2	2	5	5	5	5	5	5	5	5	5	5	4	2	2	2	5	5	4	5	5	5	5	5	5	5	5	5	4	3	5	4	5	5	5	5	3	5	5	5	5	5
2020-03-29 16:44:03	Student	Jahangirnagar University	Nilphamari	Female	5	5	5	5	4	4	4	4	4	4	4	3	2	2	4	4	4	2	3	5	5	5	5	4	4	4	4	4	4	2	4	5	3	3	4	4	2	4	4	4	4	5	4	2	4
2020-03-29 16:44:54	Ph.D. Fellow	Guangzhou University, China	Guangzhou	Male	5	5	4	4	4	3	4	4	4	5	5	5	5	4	5	3	2	2	3	4	5	4	5	4	4	5	5	5	4	4	4	5	5	5	5	4	4	4	4	3	4	5	5	4	5
2020-03-29 16:45:21	Student	Jahangirnagar University	Dhaka	Male	4	4	5	3	2	5	5	5	4	5	5	5	5	5	5	4	3	3	4	4	4	3	5	5	5	5	5	5	5	5	5	5	4	4	4	5	5	5	5	4	4	5	5	5	5
2020-03-29 16:45:30	Student	Jashore University of Science and Technology	Jashore,Khulna	Female	4	4	4	5	5	3	5	5	5	5	5	5	5	5	5	2	5	2	5	5	5	4	5	5	5	5	5	5	5	5	5	5	5	4	5	5	5	5	5	5	3	5	5	5	4
2020-03-29 16:46:09	Student	BRAC University	Mohakhali, Dhaka	Male	4	2	3	4	1	5	5	5	5	5	5	5	5	4	5	2	1	1	1	5	5	3	5	5	5	5	5	5	2	5	5	5	5	5	5	5	5	5	5	5	5	5	5	5	5
2020-03-29 16:46:51	Service Holder	Prime Bank ltd	Gulshan Avenue, Dhaka	Male	4	5	4	5	5	5	3	4	1	5	5	4	5	3	5	1	1	1	3	5	5	3	5	3	3	5	3	4	1	3	4	4	4	4	4	5	5	5	3	5	2	3	4	5	5
2020-03-29 16:47:07	Engineer	Suchona properties	Baridhara.	Male	5	4	4	5	5	5	5	5	3	5	5	4	5	5	5	1	1	1	3	5	5	3	4	5	5	5	3	4	5	5	5	4	4	5	5	5	5	4	4	5	3	4	5	5	5
2020-03-29 16:53:27	Student	Jashore University of Science and Technology	Jhenaidah	Female	4	4	5	5	1	5	5	5	4	5	5	5	5	5	5	4	4	3	3	5	4	4	5	5	5	5	5	5	4	5	5	5	5	5	5	5	5	5	5	5	5	5	5	5	5
2020-03-29 16:54:17	Student	Jahangirnagar University	Savar	Male	3	3	3	4	2	4	5	4	4	4	4	4	5	4	5	2	4	2	4	5	5	4	4	4	4	5	5	4	4	4	5	5	4	5	5	4	4	4	3	2	4	5	5	5	4
2020-03-29 16:54:59	Student	Bangladesh University of Professionals	Ramna	Female	4	3	3	4	1	4	5	4	4	4	4	5	5	4	5	2	1	2	2	4	4	2	4	5	4	5	4	3	4	4	4	2	4	4	4	5	4	4	4	3	3	5	4	5	4
2020-03-29 16:55:17	Student	CU	Naogaon	Male	5	5	5	4	4	5	5	4	5	5	5	5	5	5	5	1	1	1	1	5	5	4	5	5	5	5	4	5	5	5	5	5	4	5	5	5	5	5	5	5	3	5	5	5	5
2020-03-29 16:58:22	Student	Begum Rokeya University, Rangpur	Magura	Male	5	3	3	5	5	5	5	5	4	5	5	5	5	3	5	1	5	2	4	5	5	2	5	4	4	5	4	4	4	5	5	5	4	5	4	5	5	5	5	3	5	5	5	5	4
2020-03-29 16:58:57	Student	MIST	Shyamoli	Female	4	4	4	4	2	5	5	5	5	5	5	4	5	5	4	3	3	1	3	5	5	4	4	5	5	5	5	5	4	4	4	2	3	5	4	5	5	3	3	4	4	4	4	4	4
2020-03-29 17:01:13	Lecturer	Bangladesh University of Professionals	Mirpur, Dhaka	Male	4	4	5	4	5	5	5	5	5	5	4	5	5	5	5	2	2	1	3	4	4	3	5	4	5	5	3	4	4	4	4	4	3	5	4	5	4	4	4	3	3	4	4	4	4
2020-03-29 17:01:25	Student	Jashore University of Science & Technology	Jashore	Male	4	4	4	3	5	5	4	5	5	5	5	4	5	4	4	2	3	4	3	4	4	3	4	4	4	5	5	4	3	4	4	4	3	3	4	5	4	3	3	4	3	4	4	5	5
2020-03-29 17:06:33	Student	Dhaka City College	Dhaka	Female	3	3	5	5	3	5	5	5	4	5	5	3	3	5	5	2	1	1	2	4	5	4	4	5	5	5	5	5	5	5	5	4	5	3	4	5	5	5	4	3	3	4	5	5	5
2020-03-29 17:09:42	STUDENT	JahangirnagarUniversity	219/1,East Rampura,DhakA	Female	4	4	4	4	4	4	4	5	5	5	5	5	5	5	5	2	4	3	3	4	4	4	4	5	5	5	5	5	5	5	5	5	4	5	4	4	4	5	5	4	4	4	4	5	5
2020-03-29 17:13:27	Student	Begun Rokeya University, Rangpur	Rangpur	Male	4	4	4	5	5	5	5	5	5	5	5	5	5	5	5	3	4	3	4	5	5	4	4	4	4	5	5	2	5	5	5	5	2	4	3	5	5	5	5	5	3	5	5	5	5
2020-03-29 17:13:54	Student	Jagannath University	Narsingdi	Male	4	4	3	5	5	4	5	2	4	5	5	5	5	2	4	4	4	4	2	5	5	3	5	5	4	5	4	4	4	4	4	4	2	4	3	4	4	4	4	4	3	5	3	4	4
2020-03-29 17:16:03	Private service	Wall Street Finance LLC, USA	Mirpur DOHS	Male	5	5	4	4	5	4	4	5	3	5	5	5	5	4	4	3	3	1	3	5	5	3	5	5	4	5	4	4	3	4	5	4	3	5	5	5	5	5	5	3	4	5	4	4	4
2020-03-29 17:21:11	Teaching	University of Rajshahi	Rajshahi	Male	5	5	4	5	5	4	4	5	4	5	5	5	5	4	5	4	4	3	4	5	5	4	5	5	5	5	4	4	4	3	5	5	4	5	4	4	4	5	3	3	4	4	4	5	4
2020-03-29 17:21:31	Student	Begum Rokeya University Rangpur	Rangpur	Female	4	3	4	4	5	4	4	5	5	5	5	5	5	4	5	2	2	1	3	4	5	3	3	4	4	5	5	5	5	4	4	4	3	5	5	5	5	4	4	4	3	4	4	4	3
2020-03-29 17:28:01	Student	Begum Rokeya University, Rangpur	Rangpur	Male	5	3	3	4	2	5	5	5	5	5	5	5	5	5	5	1	2	1	2	2	5	5	2	2	5	5	5	5	5	5	5	5	5	5	5	5	5	5	5	3	5	5	5	5	5
2020-03-29 17:32:31	Student	Jahangirnagar University	Savar, Dhaka	Male	3	2	2	4	4	4	3	4	3	2	4	4	3	2	4	3	2	3	2	4	3	2	4	3	3	3	5	4	3	2	4	4	2	4	3	3	4	2	4	3	4	2	5	3	4
2020-03-29 17:35:48	Student	Jahangirnagar University	Savar, Dhaka	Male	4	2	4	5	5	5	4	5	4	5	4	5	5	4	5	5	5	2	4	5	5	4	5	5	4	4	5	3	5	4	5	5	3	5	5	5	5	5	5	5	3	5	5	4	5
2020-03-29 17:38:16	Student	Jahangirnagar University	Tongbari munshigonj	Male	5	5	5	4	5	5	4	5	2	5	5	5	5	1	5	3	1	1	1	5	5	2	3	5	5	5	5	3	4	5	5	5	2	3	5	5	5	5	5	4	4	5	3	5	5
2020-03-29 17:39:04	student	jahangirnagar University	Dhaka	Male	4	5	5	4	5	4	2	3	4	4	4	5	5	3	3	2	4	2	2	4	5	3	5	5	4	5	4	2	2	4	4	3	1	4	3	5	5	4	5	3	3	3	4	3	3
2020-03-29 17:40:19	Medical Student	TMSS Medical College	Bogura	Female	5	5	5	5	5	5	5	5	5	5	5	5	5	5	5	1	3	1	3	4	4	3	4	4	4	5	4	4	4	5	5	4	4	3	4	5	4	5	5	4	4	5	4	4	2
2020-03-29 17:40:33	Medical Student	TMSS Medical College	Bogura	Female	5	5	5	5	5	5	5	5	5	5	5	5	5	5	5	1	3	1	3	4	4	3	4	4	4	5	4	4	4	5	5	4	4	3	4	5	4	5	5	4	4	5	4	4	2
2020-03-29 17:47:16	student	Jahangirnagar University	Brahmanbaria	Female	2	3	5	4	5	5	5	5	5	5	5	5	5	5	5	4	1	1	3	5	5	3	4	5	5	5	5	5	5	5	5	3	5	3	3	5	5	5	4	5	3	5	5	5	5
2020-03-29 17:48:27	job holder	Streams tech ltd.	Banani	Male	5	5	4	5	5	5	5	5	4	5	5	4	5	5	5	5	3	2	3	5	5	4	5	5	5	5	5	5	5	5	5	4	3	4	5	5	5	5	5	5	5	5	5	5	5
2020-03-29 17:52:34	Student	Eden MahilaCollege	Munshigan, Dhaka	Female	5	5	5	5	5	5	5	5	5	5	5	5	5	5	5	1	1	1	1	5	5	3	5	1	3	5	5	5	5	5	5	5	5	5	5	5	5	5	5	5	5	5	5	5	5
2020-03-29 17:53:14	PhD Student	Gwangju Institute of Science and Technology	Gwangju, South Korea	Male	5	1	4	5	4	4	5	4	4	5	5	5	5	4	5	2	4	3	2	5	5	3	4	5	5	5	4	4	5	4	5	5	4	5	5	5	5	4	5	4	4	5	4	5	4
2020-03-29 17:53:20	student	University of Chittagong	Devidwer, Comilla	Female	4	4	4	4	5	5	5	5	5	5	5	5	5	5	5	3	3	4	5	4	4	4	4	5	5	5	5	5	5	3	3	5	5	3	4	4	4	4	4	4	4	4	4	5	5
2020-03-29 17:54:33	Student	Jahangirnagar University	Darshana	Male	4	4	4	5	5	5	5	5	5	5	4	5	5	4	5	1	2	3	3	5	5	3	5	5	5	5	5	4	5	5	5	5	4	5	4	5	5	5	4	3	2	1	2	4	4
2020-03-29 17:55:25	Dental Surgeon	Dr.Asif's Dental Centre	Dhaka	Male	2	3	1	4	5	5	4	5	3	4	5	5	4	4	4	4	2	2	4	4	4	4	5	4	5	5	5	3	3	2	5	5	3	5	3	4	4	5	5	4	1	5	5	5	5
2020-03-29 17:55:44	Teaching	Jahangirnagar University	Dhaka	Male	5	5	5	5	5	5	5	5	5	5	5	5	5	5	5	1	1	1	1	5	5	5	5	5	5	5	5	5	5	5	5	5	5	5	5	5	5	5	5	5	5	5	5	5	5
2020-03-29 17:58:01	student	BRUR	sundarganj	Male	1	5	5	5	5	5	5	5	5	5	5	4	5	5	5	2	3	2	3	5	5	4	4	5	5	5	5	5	5	5	5	5	5	5	5	5	5	4	5	5	5	5	5	5	5
2020-03-29 18:06:12	Student	University of Dhaka	Munshiganj	Male	5	4	4	3	5	2	5	1	4	3	4	4	5	3	4	3	4	2	4	5	5	4	4	5	5	5	4	3	2	4	4	5	3	4	2	4	4	4	4	2	4	5	4	4	4
2020-03-29 18:12:20	student	Eden Mohila College	Azimpur	Female	4	4	5	4	4	3	4	3	3	3	3	2	3	3	5	5	3	5	3	5	5	5	5	4	3	5	3	5	4	4	5	5	3	3	5	3	4	3	4	2	3	3	3	5	5
2020-03-29 18:22:06	Scientist	Bangladesh Atomic Energy Commission	Dhaka	Male	3	3	2	2	3	3	5	4	4	5	5	5	4	4	5	3	3	3	3	4	5	5	5	5	4	4	5	5	4	3	4	4	4	4	3	3	4	4	4	4	3	5	5	5	5
2020-03-29 18:23:23	Student	Jashore University of Science and Technology	Jashore,Khulna,Bangladesh	Female	4	4	4	4	4	2	4	4	4	4	4	4	4	4	4	2	2	1	2	4	4	4	5	5	5	5	5	5	5	5	5	5	5	5	5	5	5	5	5	5	5	5	5	5	5
2020-03-29 18:28:30	Student	Jahangirnagar University	Dhaka	Male	2	3	3	1	5	5	1	4	3	5	5	3	4	5	5	5	2	3	3	5	5	3	5	5	5	5	3	5	5	5	5	5	3	3	5	5	3	2	2	3	1	3	3	4	4
2020-03-29 18:29:50	Student	JU	Savar	Male	4	4	4	4	3	5	4	5	5	5	5	5	5	5	5	2	3	4	4	5	5	4	5	5	5	5	4	4	5	5	5	5	4	5	5	5	5	5	5	5	4	5	5	5	5
2020-03-29 18:37:58	Student	RAMC	Rangpur	Female	5	5	5	3	1	1	5	5	5	5	5	5	5	3	5	1	2	1	2	5	5	4	5	3	2	5	5	5	5	4	4	4	3	5	5	5	5	5	5	5	5	5	5	5	5
2020-03-29 18:38:24	Student	Jahangirnahar University	Dhaka	Male	2	2	4	4	5	5	5	5	5	5	5	5	5	5	5	1	4	2	4	5	5	4	4	4	4	5	5	2	5	4	5	4	4	4	5	2	5	5	5	2	4	5	5	5	4
2020-03-29 18:38:30	Student	Department of Environmental Sciences, Jahangirnagar University	Jahangirnagar, Savar,Dhaka	Male	4	3	4	4	5	5	5	5	5	5	4	5	4	2	5	2	1	1	2	5	5	3	5	5	5	5	5	5	5	5	5	5	5	5	5	5	5	5	5	5	4	5	5	5	5
2020-03-29 18:47:46	Student	Jahangirnagar university	Savar, Dhaka	Female	4	4	5	4	5	5	5	5	4	5	5	5	5	4	5	1	1	1	4	5	5	3	4	5	5	5	5	5	5	5	5	4	4	3	4	5	5	5	5	3	4	5	4	5	5
2020-03-29 18:48:25	Student	BUP	MIRPUR CAN'T	Male	4	3	2	4	5	5	5	4	4	4	4	4	5	3	3	3	4	4	4	5	5	4	5	5	5	5	5	5	1	4	3	4	4	4	5	2	4	4	4	3	2	5	5	5	5
2020-03-29 18:53:08	Student	Jagannath university	Dhaka	Male	5	5	4	4	3	5	5	5	5	5	5	4	5	5	5	5	2	1	1	3	5	5	5	3	3	5	5	5	4	4	5	5	5	5	5	4	5	5	4	5	5	5	5	5	5
2020-03-29 18:58:04	Student	Jahangirnagar University	Dinajpur	Male	4	4	4	5	5	5	4	5	4	5	3	5	5	4	5	3	4	2	3	5	5	3	3	5	4	5	5	4	5	5	5	3	4	4	3	5	5	4	3	3	3	4	4	5	5
2020-03-29 19:00:37	Student	Jahangirnagar University	Savar, Dhaka	Female	4	4	3	4	4	4	4	4	3	4	4	4	4	4	4	3	2	4	4	4	4	4	4	4	4	4	4	4	4	4	4	4	4	4	3	3	4	4	4	4	4	4	4	4	4
2020-03-29 19:03:04	Student	Jahangirnagar University	Dinajpur	Male	5	5	5	2	3	5	5	5	5	5	2	3	5	3	4	3	2	1	3	4	5	2	5	5	5	5	4	3	4	3	4	5	2	5	5	5	5	4	4	1	3	5	4	5	4
2020-03-29 19:05:03	Student	North south University	Nikunja	Female	3	3	5	5	5	5	5	5	3	4	4	5	4	4	5	2	1	2	1	1	1	3	5	5	5	5	5	5	5	5	5	3	4	5	3	5	4	4	1	3	5	5	5	5	5
2020-03-29 19:08:05	Student	Jahangirnagar University	Savar	Female	4	4	2	4	2	5	4	5	4	5	4	4	5	4	4	2	2	2	3	5	4	4	5	4	4	5	4	4	4	4	4	4	3	4	4	4	4	4	4	3	4	4	4	4	4
2020-03-29 19:09:18	Urban Planner	ICLEI South Asia	Rajshahi	Male	4	3	4	4	5	5	5	5	5	5	5	5	5	5	5	2	3	4	3	4	4	4	5	5	5	5	4	5	4	5	4	4	4	5	4	4	4	3	4	4	5	5	4	5	4
2020-03-29 19:14:13	Student	Jahangirnagar University	Savar, Dhaka	Male	4	5	2	5	3	5	5	3	4	5	4	4	5	2	5	2	4	4	3	5	4	4	5	4	5	5	5	3	4	5	5	5	2	4	3	5	3	4	5	1	4	5	5	4	3
2020-03-29 19:21:13	Student	Jashore University of science & technology	Chowgacha	Male	5	3	3	5	4	5	5	5	5	5	5	5	5	5	5	1	3	4	2	5	5	2	5	5	5	5	5	5	5	5	5	5	5	5	3	5	5	5	5	2	5	5	5	5	5
2020-03-29 19:21:50	student	cu	rajshahi	Female	5	5	5	5	5	5	5	5	1	1	1	1	1	1	5	1	1	1	1	5	5	5	5	5	5	5	5	5	5	5	5	5	4	5	5	5	5	4	5	5	4	5	5	5	5
2020-03-29 19:25:02	student	cu	rajshahi	Female	5	5	5	5	5	5	5	5	1	1	1	1	1	1	5	1	1	1	1	5	5	5	5	5	5	5	5	5	5	5	5	5	4	5	5	5	5	4	5	5	4	5	5	5	5
2020-03-29 19:30:01	Student	MIST	Mohammadpur	Male	4	4	4	5	3	5	5	3	5	5	5	5	5	5	5	1	3	2	3	5	5	3	4	5	5	5	5	5	5	4	5	3	3	4	5	5	5	5	4	2	3	4	5	5	5
2020-03-29 19:37:11	Lecturer	MIST	Mirpur	Male	5	3	4	5	2	4	5	4	5	5	5	5	5	5	4	4	1	2	1	4	5	4	5	5	5	5	5	4	3	3	3	4	4	5	5	5	5	5	4	4	4	5	4	4	4
2020-03-29 19:39:33	Govt job	Department of Environment	Comilla	Male	5	4	4	5	5	5	5	5	5	5	5	5	5	5	5	1	3	1	3	4	5	3	5	4	4	5	5	5	4	5	5	4	5	5	5	5	5	5	5	5	3	5	5	5	5
2020-03-29 19:40:13	Psychologist	Nitol Niloy Group	Dhaka	Female	3	2	1	4	3	3	5	5	5	5	5	5	4	2	5	3	3	4	3	4	5	4	5	5	5	5	4	4	5	4	5	5	3	5	4	5	5	5	5	3	5	4	5	5	5
2020-03-29 19:52:23	Private Service	First Finance Limited	Kawranbazar, Dhaka	Male	5	4	5	5	5	5	5	5	5	5	5	5	5	4	5	2	2	2	2	5	5	5	5	5	5	5	5	5	4	5	5	5	4	5	5	5	5	5	4	5	4	5	5	5	5
2020-03-29 20:00:56	student	chittagong university	dhaka	Male	1	1	2	1	2	5	5	5	5	5	5	5	5	4	4	1	2	2	1	1	1	1	5	5	5	5	5	5	5	5	5	5	5	2	1	1	1	2	2	2	5	5	5	5	5
2020-03-29 20:01:33	student	chittagong university	dhaka	Male	1	1	2	1	2	5	5	5	5	5	5	5	5	4	4	1	2	2	1	1	1	1	5	5	5	5	5	5	5	5	5	5	5	2	1	1	1	2	2	2	5	5	5	5	5
2020-03-29 20:02:23	Student	Military Institute of Science and Technology	Mirpur	Female	4	4	4	2	3	4	5	5	3	5	5	5	5	2	5	5	3	3	3	5	5	3	5	4	4	4	3	4	4	5	4	4	2	5	5	5	5	5	3	4	2	5	4	2	3
2020-03-29 20:09:03	Student	Bangladesh University of Professionals	Tolarbag, Mirpur 1,Dhaka	Female	5	4	5	5	5	5	4	5	4	5	5	5	5	5	5	2	3	1	3	5	5	5	5	4	5	5	5	5	4	5	5	5	5	5	5	1	5	5	5	5	5	5	5	5	5
2020-03-29 20:14:56	Student	Begum Rokeya University, Rangpur.	Pirgonj, Rangpur	Male	2	2	2	4	4	5	5	4	4	4	4	5	4	5	5	3	4	4	2	5	5	4	5	5	5	5	5	5	4	5	5	5	5	4	2	4	4	4	5	2	4	4	4	5	4
2020-03-29 20:20:17	student	Dhaka university	sherpur	Female	4	5	5	5	4	5	4	5	5	5	5	5	5	5	5	5	1	1	2	4	5	1	5	5	5	5	5	5	5	5	5	5	5	5	4	5	5	5	5	5	5	5	5	5	5
2020-03-29 20:24:19	Student	Home economics college	Mohammadpur	Female	4	5	4	4	4	5	5	5	5	5	5	5	5	5	5	2	1	1	4	4	4	3	4	4	5	5	4	4	4	5	5	4	4	5	5	5	5	5	4	3	3	4	4	4	4
2020-03-29 20:27:30	Student	Habibullah Bahar University	Shantinagar	Female	5	2	2	5	5	5	5	5	5	5	5	5	5	1	5	5	5	5	5	5	5	5	5	5	5	5	5	5	5	5	5	5	5	1	5	5	5	5	5	5	5	5	5	5	5
2020-03-29 20:36:06	Business	SA Corporation	Uttara, Dhaka	Male	4	4	3	5	4	3	5	4	3	5	5	3	5	5	5	3	4	2	4	4	5	4	4	4	5	4	5	4	3	4	5	3	4	4	2	3	3	4	3	4	4	5	5	5	4
2020-03-29 20:37:04	Lawyer	Judge Court	Dhaka	Female	5	5	5	4	5	5	5	5	5	5	5	5	5	1	5	1	2	3	1	5	5	5	5	5	5	5	5	5	3	3	5	5	5	5	5	5	5	5	5	1	4	5	4	4	5
2020-03-29 20:38:30	Student	Jahangirnagar University	Dhaka	Female	5	4	5	5	4	5	5	5	5	5	4	5	5	2	5	2	1	1	2	5	5	3	5	4	5	5	4	4	5	5	5	5	4	5	4	5	5	5	5	3	4	5	4	4	5
2020-03-29 20:43:53	Student	Jahangirnagar University	Kushtia	Female	4	4	5	4	5	5	5	5	4	5	5	5	5	5	5	1	3	3	3	5	5	3	5	5	5	5	4	5	5	4	5	5	5	5	5	4	4	4	5	4	3	5	5	5	5
2020-03-29 20:47:16	Student	Jahangirnagar University	Dhaka	Female	4	4	4	3	4	3	4	5	5	5	4	5	5	5	5	2	1	1	1	4	5	3	5	5	5	5	5	5	4	4	5	4	4	5	5	5	5	4	5	4	3	4	4	4	4
2020-03-29 20:47:47	Teacher	Jahangirnagar University	Savar, Dhaka	Male	2	2	2	2	5	5	5	5	5	5	5	5	5	5	5	1	1	1	1	4	5	3	5	5	5	5	5	5	3	3	4	5	3	3	1	5	3	4	4	5	3	5	2	5	5
2020-03-29 20:50:45	Student	Dhaka University	Mymensingh	Male	1	3	5	5	5	5	4	3	3	3	2	4	3	3	4	3	3	3	4	2	4	3	4	3	2	2	4	3	4	4	5	4	3	4	3	4	5	3	4	3	3	4	3	3	4
2020-03-29 20:57:01	Student	Bangladesh University of Professionals	Dhaka Cantonment, Mirpur 12	Female	5	5	4	4	4	4	4	5	3	5	5	4	5	1	4	3	4	3	4	5	5	4	5	4	4	5	4	5	5	4	5	5	4	5	3	5	4	4	4	3	4	5	4	4	3
2020-03-29 21:10:06	Emp balcao	Molla ltd	Lisbon	Male	5	5	5	5	5	5	5	5	5	5	5	5	5	5	5	1	1	3	3	5	4	4	5	4	5	5	5	5	5	2	5	3	4	5	5	4	4	5	5	5	4	5	5	5	5
2020-03-29 21:19:03	Student	Jahangirnagar University	Savar, Dhaka	Male	4	3	5	3	5	3	5	5	5	5	5	5	5	5	5	1	3	2	3	5	4	5	4	4	5	5	5	4	5	4	5	5	3	4	4	5	5	4	5	4	3	5	4	5	5
2020-03-29 21:29:20	student	BUP	Dhaka	Male	5	4	3	5	5	5	5	5	4	5	5	3	5	2	5	3	2	1	3	5	5	4	5	5	5	5	5	4	4	5	5	4	5	4	4	5	5	4	4	3	3	5	4	5	5
2020-03-29 21:31:57	Student	BAIUST	Cumilla Cantonment	Female	4	4	4	4	4	4	4	4	4	4	4	4	4	4	4	1	5	1	2	4	4	4	4	4	4	4	4	4	4	4	4	4	4	4	3	4	4	4	4	3	3	4	4	4	4
2020-03-29 21:32:07	Student	BAIUST	Cumilla Cantonment	Female	4	4	4	4	4	4	4	4	4	4	4	4	4	4	4	1	5	1	2	4	4	4	4	4	4	4	4	4	4	4	4	4	4	4	3	4	4	4	4	3	3	4	4	4	4
2020-03-29 21:33:26	Job Holder	SMEC	Uttara	Female	5	5	5	5	5	3	5	5	4	5	4	4	4	5	5	3	4	5	5	5	5	4	5	3	3	5	3	2	3	2	3	4	3	3	4	4	5	4	4	2	4	5	5	5	5
2020-03-29 21:34:55	Student	Jahangirnagar University	Savar	Female	5	5	4	5	4	5	4	5	5	5	4	5	5	4	5	4	4	1	4	5	5	4	4	5	5	5	5	4	4	4	4	5	2	4	4	4	4	5	4	4	5	5	2	5	4
2020-03-29 21:35:06	Student	University of Dhaka	Dhanmondi	Male	3	3	3	3	4	4	5	5	5	4	5	5	5	5	5	3	5	5	3	5	5	4	4	5	4	3	3	3	3	4	4	4	4	4	3	4	5	5	5	3	3	5	4	5	3
2020-03-29 21:41:50	2	tyg	NarayanGanj	Male	3	5	5	4	4	3	3	4	4	3	3	3	2	2	5	3	4	4	4	5	5	4	5	3	4	5	5	4	4	5	5	5	4	3	4	3	5	5	5	3	4	4	4	5	4
2020-03-29 21:42:02	Student	Jahanggirnagar University	Savar,Dhaka	Female	5	5	5	5	5	5	5	5	1	5	5	5	5	5	5	1	1	1	1	5	5	1	5	5	5	5	5	5	5	5	5	1	5	5	5	5	5	5	5	5	5	5	5	5	5
2020-03-29 21:42:53	Student	University of Dhaka	Motijheel	Female	5	5	5	5	2	5	4	5	4	5	5	5	5	5	5	1	1	1	4	4	5	5	5	5	5	5	2	3	4	4	2	1	5	5	5	5	5	5	3	5	4	5	2	4	3
2020-03-29 21:43:12	Job holder	M&J Group	Gazipur	Male	1	4	5	5	5	4	5	4	4	5	5	4	5	5	5	2	5	2	3	5	5	5	4	4	4	5	4	5	4	5	5	2	2	2	3	4	4	4	4	3	3	4	4	5	4
2020-03-29 21:44:18	শিক্ষকতা	আইডিয়াল স্কুল অ্যান্ড কলেজ	মতিঝিল	Male	5	5	5	5	5	5	5	5	5	5	5	5	5	5	5	3	4	3	3	5	5	3	5	5	5	5	5	5	5	5	5	5	5	4	5	5	5	5	5	3	5	5	5	5	5
2020-03-29 21:53:25	Student	University of Dhaka	Dhaka	Female	4	4	5	5	5	3	5	4	3	4	4	5	5	4	5	4	4	3	3	5	5	4	5	5	5	4	4	5	4	4	5	5	5	5	3	4	4	5	3	4	5	5	5	5	5
2020-03-29 21:56:26	Student	University of Dhaka	Dhaka	Female	5	5	5	3	5	5	5	5	5	5	5	5	5	2	4	2	4	4	2	5	5	5	5	5	5	5	2	5	1	5	5	5	5	5	5	5	5	5	5	3	4	5	5	5	5
2020-03-29 21:57:42	Lecturer	Bangladesh University of Health Sciences	Mirpur 1, Dhaka, Dangladesh	Male	5	5	5	5	5	4	5	5	4	5	5	5	5	5	5	2	4	5	5	5	5	5	5	5	5	5	4	5	5	5	5	5	4	5	5	5	5	5	5	4	5	5	5	5	5
2020-03-29 21:59:50	Student	University of Dhaka	Uttara	Male	4	2	3	2	5	5	5	5	5	4	5	5	5	5	5	1	4	2	3	4	5	3	4	5	5	5	5	5	5	3	5	4	3	3	3	5	4	5	4	3	3	5	4	5	5
2020-03-29 22:01:53	Private Service	BRAC	Dhaka	Male	4	4	4	2	5	4	5	5	5	4	5	5	5	4	5	2	3	2	4	5	4	4	5	5	4	5	4	5	2	5	5	4	4	4	4	5	4	4	4	4	4	5	5	5	5
2020-03-29 22:02:24	Student	Jahangirnagar University	Savar Dhaka	Male	5	5	5	4	5	1	5	5	4	5	5	5	5	5	5	1	1	1	1	4	5	3	4	5	5	5	5	5	5	5	5	5	5	5	5	5	4	4	4	5	4	5	3	4	4
2020-03-29 22:03:24	Student	North South University	Kakrail	Female	4	3	4	4	4	4	5	5	3	4	3	4	4	5	4	3	4	4	3	5	5	5	5	5	5	5	5	5	4	5	5	4	4	4	4	5	5	5	3	3	3	5	4	5	5
2020-03-29 22:04:05	Student	JU	Dhaka	Female	5	5	5	5	5	5	5	5	5	5	5	5	5	5	5	3	5	5	5	5	5	5	5	5	5	5	5	5	5	5	5	5	5	5	5	5	5	5	5	5	5	5	5	4	5
2020-03-29 22:10:12	Teaching (Associate Professor)	Jahangirnaga University	Savar, Dhaka	Female	4	4	5	5	4	5	5	4	4	5	5	5	5	4	5	4	2	1	2	5	5	5	5	5	4	4	3	4	3	5	4	4	5	4	4	5	4	5	4	5	4	5	4	4	4
2020-03-29 22:18:55	Private Service	National NGO	Dhaka	Male	5	5	5	5	5	5	5	4	4	5	5	5	5	5	5	4	4	1	3	5	5	5	5	4	5	5	4	5	4	5	5	4	5	4	4	4	4	4	4	4	4	5	5	5	5
2020-03-29 22:20:41	Private service	BVCPS BD LTD.	Dhaka	Female	5	5	5	5	3	5	5	5	4	5	5	5	5	2	5	4	1	1	2	4	5	3	5	4	4	5	4	4	3	5	5	3	4	4	5	5	5	5	5	5	4	5	5	5	5
2020-03-29 22:24:22	ছাত্র	চট্টগ্রাম বিশ্ববিদ্যালয়	নওগাঁ সদর	Male	5	5	5	4	4	4	5	4	1	2	2	2	1	2	4	4	4	4	3	4	4	3	4	3	3	4	5	4	2	2	1	3	4	4	2	4	5	5	2	2	4	5	4	5	3
2020-03-29 22:24:22	student	Jahangirnagar University	Savar	Female	4	4	5	5	3	3	5	5	4	5	4	3	4	2	4	2	2	3	3	4	4	4	5	5	4	5	5	4	4	5	5	4	4	2	5	4	5	5	4	2	5	5	4	4	4
2020-03-29 22:25:11	Banker	Agrani bank limited	Manikgonj	Male	3	3	3	3	4	5	3	5	5	5	5	5	5	3	5	1	1	1	1	1	3	3	5	4	5	5	5	5	5	5	5	5	5	4	3	5	3	3	4	2	4	5	5	5	5
2020-03-29 22:25:50	Tahmid	JahangirnagarUniversity	Savar	Male	3	3	2	2	3	4	5	5	5	5	5	5	5	5	5	2	1	1	1	5	5	3	2	5	5	3	5	3	4	5	5	4	2	5	4	5	5	5	3	4	2	5	5	5	5
2020-03-29 22:27:42	student	University of Dhaka	Dhaka	Female	4	4	4	4	4	5	4	5	5	5	5	5	5	4	5	2	3	2	2	4	5	3	4	4	4	5	4	4	4	4	5	4	3	5	5	5	5	5	4	3	4	4	4	5	5
2020-03-29 22:28:26	Student	Jahangirnagar University	Rampura	Male	3	3	3	4	5	5	5	4	5	5	5	5	5	3	4	4	2	1	2	5	5	3	5	5	5	5	4	5	4	5	5	4	3	3	3	4	4	4	4	4	3	5	4	4	4
2020-03-29 22:28:46	Intern	Axiata Digital Bangladesh	Gulshan	Female	5	4	4	4	3	4	4	5	3	4	4	4	5	5	4	5	5	4	5	5	5	5	1	5	4	5	4	4	4	4	4	4	4	4	5	4	3	4	4	4	4	4	5	4	4
2020-03-29 22:31:28	Teaching	AIUB	Uttara	Female	5	5	5	5	5	5	5	5	5	5	5	5	5	5	5	1	4	4	2	5	5	4	5	5	5	5	5	5	5	5	5	4	5	4	4	4	4	3	4	4	2	5	5	5	5
2020-03-29 22:47:23	Student	University of Dhaka	Dhaka	Male	5	5	5	5	5	5	5	5	5	5	5	5	5	4	5	3	3	1	3	5	5	3	5	5	5	5	5	5	5	5	4	4	5	5	5	5	5	5	4	3	3	5	5	5	5
2020-03-29 22:47:35	ব্যাংকার	অগ্রণী ব্যাংক	জাহাঙ্গীরনগর শাখা , সাভার	Male	5	5	5	4	5	5	5	5	4	5	5	5	5	5	5	2	2	2	4	5	5	3	5	5	4	5	5	5	5	5	5	5	5	5	5	5	5	5	5	5	5	4	4	4	5
2020-03-29 22:48:44	Student	Begum Rokeya University, Rangpur	Thakurgaon	Female	5	4	5	5	5	5	4	5	3	5	5	4	5	4	3	1	2	1	4	5	5	4	5	4	4	4	3	4	3	4	4	4	3	5	5	5	5	4	4	4	5	5	4	4	4
2020-03-29 22:52:56	Lecturer	Srijanee Bidyaniketon School and College	Patuakhali	Male	3	3	1	3	3	2	5	4	4	4	4	4	4	4	3	2	2	2	2	2	2	2	4	5	5	5	5	5	4	4	4	4	4	5	4	4	4	3	4	3	4	5	5	4	4
2020-03-29 22:57:25	Manager	Shahjalal Life Home Builders Ltd	Jatrabari, Dhaka 1204	Male	5	4	4	3	4	2	4	5	3	4	4	3	5	2	4	2	3	1	3	4	4	3	5	2	4	5	5	3	3	4	4	4	4	3	4	5	4	3	2	4	4	4	4	4	4
2020-03-29 22:58:57	Town Planner	Urban and Regional Planning	Dhaka	Male	4	4	5	3	3	4	5	4	3	4	5	5	5	4	5	1	2	2	2	5	5	3	5	5	5	5	4	3	4	4	5	3	3	3	4	4	4	4	4	4	3	4	4	4	4
2020-03-29 23:01:27	Student	Jahanginagor University	Khatlabaru Shibchair Madaripur	Male	1	3	3	4	5	2	2	3	5	5	5	5	4	4	5	4	5	4	5	5	5	5	5	3	3	5	5	1	2	5	5	5	4	4	2	5	4	5	4	1	1	5	5	5	5
2020-03-29 23:03:10	teaching	Jahangirnagar University	Savar, Dhaka	Male	5	3	4	4	5	5	5	4	3	5	5	5	5	2	5	2	3	1	3	4	5	3	5	5	4	5	4	5	4	4	4	5	5	5	5	5	5	5	5	5	5	5	5	5	5
2020-03-29 23:05:35	Development professional	IIF	Dhaka	Female	5	3	5	5	2	5	5	5	2	5	5	5	5	5	5	1	1	1	4	4	5	3	4	5	5	5	5	5	4	4	5	4	4	5	5	5	5	4	4	5	3	5	5	5	5
2020-03-29 23:09:59	Student	BUP	Mirpur cantt	Female	4	2	5	5	5	3	5	5	2	5	5	5	5	5	5	3	3	3	4	5	5	1	5	5	5	5	5	5	5	5	5	5	5	5	4	5	5	5	5	3	4	5	5	3	3
2020-03-29 23:10:50	Student	Bangladesh university of professionals (BUP)	Dhaka	Female	3	4	5	5	5	2	5	5	5	5	5	5	5	5	5	3	3	3	3	5	5	5	4	5	5	5	5	5	5	2	4	5	5	5	5	5	4	4	4	2	3	4	5	5	5
2020-03-29 23:12:51	Engineer	TR Online Printing Press	Dhaka	Male	5	3	5	3	4	2	5	5	5	5	5	5	5	2	5	4	2	2	5	5	5	5	5	5	5	5	5	5	5	5	5	5	5	5	5	5	5	5	5	3	5	5	5	5	5
2020-03-29 23:12:57	Student	Jahangirnagar University	Mymensingh	Male	5	5	5	5	5	5	5	4	5	5	5	5	5	4	5	4	4	4	4	5	5	4	5	5	5	5	5	4	3	2	5	5	3	5	5	5	5	5	4	3	3	5	4	5	4
2020-03-29 23:13:57	Urban planner	NKY-PROTEKYAPI-SHELTECH	Dhakar	Female	4	3	2	3	5	5	4	5	3	5	4	5	5	1	5	3	4	3	3	5	5	5	5	5	5	5	5	5	5	5	5	5	4	5	5	5	5	4	5	5	3	5	5	5	5
2020-03-29 23:21:02	Teaching	Jahangirnagar University	Mohammadpur, Dhaka	Female	3	3	2	3	4	4	5	5	2	5	5	4	5	5	5	2	3	2	3	5	5	3	5	4	4	5	5	5	2	3	5	4	3	5	5	5	5	4	5	4	3	4	3	4	4
2020-03-29 23:22:40	চাকুরি	সেইফটি এন্ড রাইটস সোসাইটি	মোহাম্মদপুর	Female	5	5	5	3	5	4	4	5	5	5	5	5	5	1	5	3	1	3	2	5	5	5	5	5	5	5	5	5	5	5	5	3	5	5	5	5	5	3	5	2	5	5	5	5	5
2020-03-29 23:27:40	Student	Jahangirnagar university	Savar Bus Stand	Male	5	3	5	3	3	4	5	5	4	5	5	5	5	5	5	1	2	2	2	2	3	2	5	5	5	5	5	5	5	5	5	5	5	5	5	5	5	5	5	5	5	5	5	4	5
2020-03-29 23:28:48	Student	University of Dhaka	Bogura	Female	4	3	4	5	3	5	5	5	4	5	5	5	5	2	5	1	2	1	3	5	4	3	5	3	4	5	4	5	5	4	5	4	4	5	5	5	5	3	4	3	3	5	5	4	4
2020-03-29 23:29:58	Service Holder	Foodpanda	Mohakhali	Female	5	5	5	5	5	5	5	5	5	5	5	5	5	5	5	3	2	2	1	5	5	3	5	5	5	5	5	5	5	5	5	5	5	5	5	5	5	5	5	5	5	5	3	5	5
2020-03-29 23:30:07	Student	Jahangirnagar University	Mirpur, Dhaka	Male	5	5	5	5	3	5	5	3	2	3	4	4	2	2	5	4	4	1	1	5	5	4	5	5	5	5	5	5	3	4	4	5	4	5	5	5	5	5	4	3	1	3	3	5	5
2020-03-29 23:30:30	Privet service	Buying House	Baridhara	Male	5	5	5	4	4	4	4	4	5	4	4	5	5	3	5	2	4	3	4	5	5	5	4	5	5	4	2	5	3	4	4	4	2	5	5	4	5	4	3	3	4	5	3	5	4
2020-03-29 23:35:23	Student	BUP	Banasree	Female	5	5	5	5	4	5	5	5	4	5	5	5	5	5	5	3	4	3	3	5	5	3	5	5	5	5	4	4	5	5	5	5	5	5	5	5	5	5	5	4	5	5	5	5	5
2020-03-29 23:39:36	Faculty	Feni University	Feni	Male	4	2	2	5	5	5	4	5	4	4	4	5	4	5	5	5	4	2	2	4	5	3	4	5	5	5	4	4	4	5	5	3	4	4	4	4	4	4	3	3	4	3	4	4	4
2020-03-29 23:43:28	Student	Bangladesh University of Professionals BUP)	Mirpur	Female	4	4	5	4	2	4	5	5	5	5	5	5	5	3	5	2	4	3	3	5	2	2	5	4	4	3	3	5	3	4	4	2	4	5	3	5	5	5	5	3	5	5	5	5	5
2020-03-29 23:44:44	Student	Bangladesh University of Professionals (BUP)	Dhaka	Male	5	5	5	5	5	5	5	5	5	5	5	5	5	5	5	2	2	2	4	4	4	4	5	5	5	5	5	5	5	5	5	5	5	5	5	5	5	5	5	3	5	5	5	5	5
2020-03-29 23:46:04	Student	Bangladesh University of Professionals	Mirpur Cantonment	Female	5	4	3	5	5	5	5	5	5	5	5	5	5	3	5	5	2	2	3	5	5	5	4	5	4	5	5	5	5	5	5	4	4	4	4	5	5	5	5	5	3	5	3	4	4
2020-03-29 23:47:21	Assistant Professor	Department of Microbiology, Jahangirnagar University	Savar, Dhaka	Female	4	3	4	4	4	5	5	5	2	5	5	5	5	5	5	1	1	1	2	3	5	3	5	5	5	5	5	5	5	5	5	5	4	5	5	5	5	4	4	5	3	5	5	5	5
2020-03-29 23:50:00	Teacher	Private University	Dhaka	Male	5	3	3	4	4	5	4	5	5	5	5	4	5	5	5	1	1	1	3	4	5	4	5	4	4	5	4	2	2	2	4	1	1	5	5	5	5	5	3	5	3	4	4	4	4
2020-03-29 23:51:06	Development Worker	Water and Sanitation for the Urban Poor	Chattogram	Male	5	4	3	4	4	4	5	5	4	4	5	4	4	4	4	3	4	3	3	4	5	3	4	4	4	5	4	4	4	4	4	4	4	4	4	4	4	4	4	3	3	5	3	4	4
2020-03-29 23:56:13	Researcher	BRAC University	Uttara	Female	5	4	5	4	3	5	5	5	4	5	5	5	5	4	5	2	2	2	2	4	4	4	5	4	4	5	4	4	4	3	4	4	4	5	4	5	5	5	4	4	4	5	4	5	5
2020-03-30 00:00:10	Student	Dhaka university	Dhaka	Female	5	5	5	5	5	3	5	5	2	5	5	5	5	4	5	2	4	5	5	5	4	2	5	5	5	5	3	2	1	3	3	5	1	3	3	2	3	5	5	2	2	4	5	5	4
2020-03-30 00:04:56	Student	Jahangirnagar university	Khulna	Male	3	3	3	4	5	3	5	5	5	5	5	5	5	5	5	2	3	3	3	5	5	5	5	5	5	5	5	5	5	5	5	5	3	5	5	5	5	5	3	4	5	5	5	5	3
2020-03-30 00:13:24	Service	Care Bangladesh	Mohakhali Dhaka	Female	4	3	4	4	4	4	3	3	4	3	4	4	4	3	4	2	4	4	3	4	4	4	3	4	5	4	3	4	3	3	4	4	4	4	3	4	4	4	3	4	4	4	3	4	4
2020-03-30 00:22:52	Private Service	Li&Fung Ltd.	Dhaka , Bangladesh	Male	5	4	4	5	5	4	5	5	5	5	5	3	5	5	5	3	4	2	2	5	5	3	5	5	5	5	5	5	4	4	4	4	5	5	5	5	5	5	5	5	5	5	5	5	5
2020-03-30 00:26:59	Teacher	Jahangirnagar University	Savar, Dhaka-1342	Female	4	3	4	4	5	5	5	5	5	5	5	5	4	3	4	3	5	5	5	5	5	4	5	5	4	5	5	3	2	3	3	4	4	5	5	4	4	4	5	3	3	5	3	3	4
2020-03-30 00:28:28	Student	University Of Chittagong	Chittagong, Bangladesh	Male	5	5	4	2	4	4	5	5	5	5	5	4	5	4	4	3	1	2	4	5	5	4	5	5	4	4	5	4	4	2	4	4	2	4	4	3	5	5	5	5	5	5	5	5	5
2020-03-30 00:38:02	Professor of Pharmacy	Jahangirnagar University	Adabor, Dhaka 1207	Male	3	2	2	3	3	5	5	4	4	5	5	5	5	4	5	2	5	2	3	5	5	3	5	5	5	5	5	5	4	4	5	5	4	5	4	5	5	5	5	4	3	5	4	4	4
2020-03-30 00:43:59	Teaching	Jahangirnagar University	Dhaka	Male	1	1	1	3	5	5	5	5	5	5	5	5	5	3	5	1	4	4	2	4	5	3	1	5	5	5	5	5	5	5	5	5	5	5	5	5	5	5	3	4	1	5	3	5	5
2020-03-30 00:44:01	Private service	Islamic Relief Bangladesh	Dhaka	Male	2	4	2	2	5	5	5	4	5	5	5	4	5	2	5	2	5	2	2	5	4	2	5	5	5	5	5	5	2	3	5	4	4	4	4	5	5	5	2	2	4	5	4	5	5
2020-03-30 00:45:40	Job	OBHIZATRIKFOUNDATION	Mirpur, Dhaka	Male	3	4	5	3	2	5	2	4	5	5	5	5	5	2	5	1	3	1	1	4	5	2	4	3	4	5	5	4	5	5	5	5	3	4	5	5	5	5	5	3	5	5	5	5	5
2020-03-30 00:54:18	Service	Alokito Hridoy Foundation	Mohammadpur	Female	4	5	5	5	4	5	5	5	4	5	5	5	5	5	5	1	2	2	3	5	5	3	5	5	5	5	5	5	2	4	5	5	4	5	4	5	5	5	4	3	4	5	4	5	5
2020-03-30 01:02:49	Student	Jahangirnagar University	Dhanmondi	Female	5	5	5	5	5	5	5	5	1	5	5	5	1	1	5	1	1	5	1	5	5	1	5	5	5	5	1	5	5	2	5	1	1	5	5	5	5	5	4	1	5	5	5	5	5
2020-03-30 01:16:58	Teaching (on leave)	Jahangirnagar University	Winnipeg, Manitoba, Canada	Male	5	5	5	5	4	5	4	5	5	5	5	5	5	4	4	2	2	2	2	5	5	4	5	5	5	5	5	4	5	5	5	5	4	5	5	5	5	5	4	2	4	5	4	5	4
2020-03-30 01:19:46	Atik Mollick	O.CREEDS LTD	Bogura, Bangladesh	Male	4	4	4	4	4	5	5	5	5	5	5	5	5	5	5	2	1	1	4	4	5	4	5	5	5	5	5	5	3	5	5	5	5	5	5	5	5	5	5	5	4	5	4	5	5
2020-03-30 01:35:05	Teaching	Jahangirnagar University	Savar, Dhaka	Male	1	1	1	1	5	5	5	3	4	4	4	5	5	5	5	4	5	4	4	5	5	4	5	5	5	5	5	5	3	3	5	5	3	4	1	5	3	3	3	1	1	4	1	3	3
2020-03-30 01:36:25	Teacher	Bangladesh international Tutorial	Gulshan	Female	4	4	5	4	4	5	5	5	5	5	4	5	5	4	4	3	3	3	3	3	3	3	5	5	4	4	5	5	5	5	5	5	5	4	5	5	5	5	5	5	4	4	5	5	4
2020-03-30 01:47:22	Medical student	Rangpur army medical college	Rangpur	Female	2	4	4	2	4	4	4	5	3	4	5	4	5	5	5	2	5	4	3	5	4	4	5	3	4	4	3	4	4	5	5	5	2	4	4	3	5	5	4	3	3	5	4	4	4
2020-03-30 02:05:01	Student	Jahangirnagar University	Jahangirnagar University	Male	2	1	5	3	1	5	1	5	5	5	5	5	5	1	5	3	4	2	2	5	5	2	5	5	5	5	5	5	5	5	5	4	4	4	3	5	3	4	5	5	2	4	2	5	4
2020-03-30 02:08:15	Teaching	Jahangirnagar University	Savar, Dhaka	Male	5	4	5	5	4	5	5	4	4	5	5	5	5	3	5	3	3	3	5	5	5	4	5	4	4	5	5	5	4	4	5	4	4	5	5	5	5	5	4	4	4	5	3	4	4
2020-03-30 02:12:27	Housewife	None	Dhaka	Female	5	5	3	5	5	5	1	4	4	5	5	4	5	5	5	3	3	2	3	5	5	5	5	5	5	5	5	5	5	5	5	5	3	3	5	5	5	5	5	3	3	4	5	5	5
2020-03-30 02:17:59	Teaching	Jahangirnagar University	Savar	Male	4	4	3	5	1	5	5	4	5	5	5	4	4	1	5	3	3	4	4	5	5	3	5	4	5	5	1	4	2	5	4	4	3	5	5	5	5	3	5	3	2	5	2	3	2
2020-03-30 02:18:59	Teaching and research	Jahangirnagar University	Christchurch, New Zealand	Male	5	3	5	5	5	5	5	5	3	5	5	5	5	3	5	1	3	3	4	5	5	3	5	5	5	5	4	4	4	5	5	5	4	5	5	5	5	5	5	4	4	5	5	5	5
2020-03-30 02:24:32	Asif Mohtadi Ahmed	Daffodil International University	Dhaka	Male	5	4	4	5	5	5	4	5	5	5	5	5	5	2	5	5	2	1	4	5	5	4	1	5	4	4	3	3	5	2	4	5	5	5	5	5	5	5	5	4	3	5	5	4	2
2020-03-30 03:04:26	Development Professional	International Organization	East Rajabazar, Indira Road, Dhaka	Female	5	4	4	4	3	5	5	5	3	5	5	5	5	1	3	5	1	1	1	5	5	1	5	5	5	5	5	5	5	5	5	5	5	5	5	5	5	5	5	5	3	5	3	3	5
2020-03-30 03:13:16	Student	University of liberal arts bangladesh	Dhanmondi	Male	4	4	5	4	5	1	3	4	4	4	5	4	5	5	5	1	2	2	3	5	5	5	3	5	5	5	5	5	5	5	5	5	5	3	4	3	5	5	5	3	3	3	3	5	5
2020-03-30 03:41:46	Banker	CityBank Ltd	Motijheel	Male	3	4	3	5	1	3	5	4	5	4	5	5	4	5	4	3	4	4	4	5	5	4	4	5	5	5	4	3	3	4	4	5	4	5	5	5	5	5	4	3	3	5	5	5	5
2020-03-30 03:53:38	Service	A NBFI	Dhaka	Male	3	4	4	1	1	5	1	3	1	1	3	4	5	5	5	1	2	2	2	5	5	1	5	5	4	5	3	5	3	4	5	5	5	5	5	5	5	5	4	5	5	5	3	4	5
2020-03-30 03:58:55	student	mpsc	mohammadpur	Female	4	4	5	5	4	5	5	5	5	5	5	5	5	5	5	3	2	1	1	5	5	3	4	5	5	5	5	5	4	4	5	5	5	3	4	5	5	5	5	5	5	5	5	5	5
2020-03-30 06:10:35	Teaching	Jahangirnagar University	Savar, dhaka	Male	3	1	1	4	5	5	4	4	4	5	5	5	5	5	5	2	4	2	3	4	5	4	5	5	5	5	5	4	5	4	4	5	4	4	3	3	4	5	3	5	1	5	3	4	4
2020-03-30 06:25:24	Teaching	Banani Bidyaniketan School & College	Banani, Dhaka	Female	4	3	3	4	4	4	5	5	4	4	4	5	5	4	5	2	3	3	2	4	4	3	5	4	4	5	5	4	5	5	4	4	3	5	5	5	4	4	4	3	2	4	4	5	5
2020-03-30 07:32:52	Student	Chiang Mai University	Thailand	Male	4	4	3	4	4	4	5	4	4	5	4	5	5	5	5	2	4	4	5	5	3	3	5	5	5	5	4	4	3	3	5	4	4	4	3	4	4	4	4	3	3	5	3	5	3
2020-03-30 08:42:36	Doctor	Medical college for women and hospital	Uttara,dhaka	Female	3	4	5	2	1	3	5	5	1	4	4	4	4	4	2	3	2	1	3	2	5	3	5	4	4	4	4	4	4	5	4	4	5	5	3	5	5	4	5	4	4	5	4	4	4
2020-03-30 08:58:06	Private Service	GIZ	Dhaka	Male	4	3	4	4	5	5	5	5	5	5	5	5	4	5	5	3	3	2	2	5	5	3	5	5	5	5	5	4	4	4	4	5	4	5	5	5	5	5	4	3	4	5	3	5	4
2020-03-30 09:02:00	Development Worker	BRAC	Baniachong, Habigonj	Male	4	4	4	4	4	5	5	5	5	5	5	5	5	5	5	1	2	2	2	5	5	4	4	4	5	5	5	5	5	5	5	4	3	5	5	5	5	5	4	5	4	5	5	5	5
2020-03-30 09:13:46	Student	Govt. BanglaCollege	Mirpur, Dhaka	Female	5	5	1	5	5	4	5	4	5	5	4	4	5	2	5	3	3	2	1	5	5	5	5	5	5	5	3	5	4	5	5	5	4	5	3	3	5	5	5	4	3	3	2	4	4
2020-03-30 09:25:08	Civil servant	Govt. Mujibur Rahman women's College, Bogura	Rangpur	Male	5	4	3	5	4	5	4	4	4	4	5	4	5	3	5	1	3	2	3	5	5	3	5	4	5	5	5	4	4	4	4	3	5	5	5	5	5	5	4	3	5	5	3	4	4
2020-03-30 09:38:39	Unemployed	Jahangirnagar University	Singair, Manikganj	Male	3	3	5	2	5	5	3	5	5	5	5	5	5	5	5	1	3	1	1	5	5	3	3	3	5	5	3	5	2	3	5	5	3	5	5	5	5	5	5	5	5	5	3	5	5
2020-03-30 09:45:21	Doctor	Upazila health comple, Melanda, Jamalpur	Melanda, Jamalpur	Female	5	4	4	5	2	5	5	4	2	5	2	5	5	3	3	3	4	2	4	5	5	3	5	4	5	5	4	4	4	4	5	4	3	5	3	4	4	4	3	3	3	4	4	4	4
2020-03-30 10:07:15	Teaching	Primeasia University	Banani	Male	5	5	4	4	3	5	5	5	5	5	5	5	5	5	5	1	1	1	2	5	5	1	5	5	5	5	5	5	5	5	5	5	5	5	5	5	5	5	4	5	5	5	5	5	5
2020-03-30 10:09:06	House wife	No institute	Sec-12, Mirpur -Dhaka	Female	4	4	4	4	4	5	5	5	5	5	5	5	5	5	5	4	4	4	3	5	5	4	5	5	4	5	5	5	5	4	5	5	5	5	5	4	5	5	5	5	4	5	5	4	5
2020-03-30 10:16:42	Homemaker	Not applicable	Jamalpur,Sarishabari	Female	4	4	4	4	4	3	4	5	4	5	5	5	5	5	5	3	4	3	3	5	4	3	4	5	4	5	4	4	4	5	5	4	4	5	5	5	5	4	3	3	4	4	4	4	4
2020-03-30 10:20:15	Service	TUV Nord	Dhaka	Male	4	4	4	5	3	5	5	5	4	5	5	5	5	5	5	2	2	2	3	4	4	3	3	4	4	5	4	4	4	4	4	4	4	5	5	5	5	5	4	5	4	5	5	5	5
2020-03-30 10:27:20	Student	Jahangirnagar University	Dhaka	Male	4	4	5	4	4	5	5	3	4	5	5	5	5	4	5	3	3	1	3	4	5	4	4	4	4	5	5	5	5	5	5	5	5	5	5	5	5	5	5	5	4	5	5	5	5
2020-03-30 10:28:57	Government Service	Department of Cooperatives	Agargaon, Dhaka-1206	Male	5	4	4	3	5	5	5	5	5	5	5	5	5	5	5	1	1	1	1	5	5	3	4	5	5	5	5	4	2	4	4	5	4	5	5	5	5	5	5	4	2	5	5	5	5
2020-03-30 10:28:59	Private job	QA services Hong Kong Ltd	Bangladesh	Female	5	4	4	5	5	5	2	5	5	5	5	5	5	3	5	2	1	1	3	5	5	1	5	5	5	5	5	5	5	5	5	5	5	5	5	5	5	5	5	5	5	5	5	5	5
2020-03-30 10:30:14	Teacher	MBSTU	Tangail	Male	5	5	5	5	4	4	5	4	5	5	4	3	5	4	5	5	4	2	3	5	5	4	5	4	2	5	5	4	5	4	3	2	4	4	5	5	4	3	5	4	2	4	5	4	4
2020-03-30 10:34:02	Student	Government Laboratory High School	14, West End Street, Central Road, Dhanmondi, Dhaka -1205	Male	4	5	5	3	5	3	4	5	5	3	3	5	3	4	5	3	5	1	3	5	5	5	4	4	5	5	5	5	5	5	5	5	5	3	4	5	5	4	5	1	4	5	5	5	4
2020-03-30 10:41:14	Students	Jahangirnagar University	Savar DHAKA	Male	4	4	5	4	4	5	5	5	5	5	5	5	5	5	5	1	2	1	2	5	5	4	4	5	5	5	4	5	5	4	5	5	5	5	5	4	5	5	5	4	5	5	5	5	5
2020-03-30 10:47:29	Teaching	Jahangirnagar University	Savar	Male	4	2	4	2	4	5	5	5	5	5	5	5	5	5	5	1	1	1	2	4	5	2	4	5	5	5	4	4	4	5	4	5	4	4	2	5	4	4	4	5	4	5	4	5	4
2020-03-30 10:53:59	Student	Jahangirnagar University	Savar	Male	4	4	4	5	5	5	5	5	3	5	2	4	5	3	4	2	1	3	3	5	5	5	4	5	4	5	5	5	4	5	5	4	5	5	4	5	5	5	4	4	3	5	3	5	5
2020-03-30 11:06:16	Lawyer	Sisal Apparel	Baridhara DOHS	Female	5	4	4	4	5	5	5	5	5	5	5	5	5	5	5	1	2	2	2	5	5	3	5	5	5	5	5	5	3	4	5	5	4	5	4	5	4	5	4	4	5	5	5	5	5
2020-03-30 11:09:33	Student	Sonargoan University	Dhaka	Male	5	3	3	4	4	5	5	4	5	5	5	5	5	4	5	1	1	1	2	5	5	4	5	4	4	5	4	3	4	4	4	3	3	5	5	5	5	5	4	4	4	5	3	5	4
2020-03-30 11:12:15	Government service	Bangladesh Forest Department	Agargaon	Female	4	4	4	4	4	4	5	4	5	5	5	5	5	5	5	2	2	2	4	4	5	4	5	3	4	4	4	4	4	4	4	2	2	4	4	4	4	4	4	3	3	4	4	4	3
2020-03-30 11:21:20	Student	Military Institute of science & technology(MIST)	Mirpur DOHS	Male	4	2	4	3	5	5	2	5	5	5	5	5	5	5	5	1	1	1	4	5	5	3	2	5	5	5	5	5	5	5	5	5	4	4	4	5	5	5	5	5	3	5	4	5	5
2020-03-30 11:35:44	Researcher	ICCCAD	DHAKA	Male	3	3	3	2	4	3	5	5	5	5	5	4	5	5	5	2	3	1	3	5	5	5	5	5	4	5	5	4	4	3	4	4	3	4	3	4	4	4	4	3	3	4	3	4	4
2020-03-30 11:54:07	Student	Bangladesh University of professionals, mirpur cantonment, Dhaka.	Jatrabari	Female	4	3	4	4	5	4	5	3	5	5	5	5	5	3	4	4	4	4	1	5	5	3	5	5	5	5	5	5	5	5	5	5	5	5	5	5	5	5	5	5	4	5	3	5	5
2020-03-30 11:55:57	Student	JU	Kishoreganj	Male	5	5	5	5	5	5	5	5	5	5	5	5	5	5	5	1	1	1	1	5	5	2	4	5	5	5	5	3	4	5	5	5	5	5	4	5	5	5	5	5	5	5	5	5	5
2020-03-30 12:03:34	Government service	Geological survey of Bangladesh	Dhaka, Bangladesh	Male	4	4	4	4	4	4	4	4	4	4	4	4	4	4	4	4	4	4	4	4	4	4	4	4	4	4	4	4	4	4	4	4	4	4	4	4	4	4	4	4	4	4	4	4	4
2020-03-30 12:07:07	Service	Asian Development Bank	Dhaka	Female	4	4	3	4	5	5	5	5	3	4	4	3	4	1	3	4	5	4	4	5	1	5	5	5	4	4	2	3	4	4	5	4	3	5	4	4	4	5	5	3	4	5	5	5	4
2020-03-30 12:16:17	student	BRUR	Rangpur	Female	5	5	5	5	5	4	4	4	5	5	5	5	5	5	5	4	3	2	4	5	4	4	5	5	4	5	4	5	4	4	5	5	4	5	4	5	4	4	4	4	5	5	4	4	5
2020-03-30 12:16:49	Student	JahangirnagarUniversity	Netrokona	Male	3	2	3	4	5	5	5	5	5	5	5	5	5	5	5	1	2	2	3	5	5	4	5	5	5	5	5	5	5	5	5	5	5	5	4	5	5	5	5	5	5	5	5	5	5
2020-03-30 12:40:28	Private Job	Duncan Brothers Bangladesh Limited	Habiganj	Male	5	3	5	5	5	5	5	5	5	5	5	5	5	5	5	1	1	1	1	5	5	1	5	4	4	5	5	5	5	5	5	5	5	5	5	5	5	5	5	5	5	5	5	5	5
2020-03-30 12:41:02	Private service	TIB	Dhaka	Male	3	2	2	4	2	4	5	4	5	4	2	5	5	3	3	2	4	3	3	4	5	3	5	5	5	5	5	5	4	5	5	5	5	4	2	4	2	3	5	5	4	4	4	5	4
2020-03-30 12:45:17	Teaching	Jahangirnagar University	Savar, Dhaka, Bangladesh	Male	4	4	5	4	5	5	5	4	3	5	5	5	5	4	5	2	2	1	4	5	5	4	5	5	5	5	3	5	5	4	5	5	4	4	3	5	5	4	4	5	4	5	5	5	5
2020-03-30 12:59:47	Student	Jahangirnagar University	Dhaka	Female	4	4	5	4	3	5	5	5	5	5	5	5	5	5	5	3	2	1	3	5	5	3	4	5	5	5	5	5	5	4	5	5	4	5	5	5	5	5	5	5	4	5	5	5	5
2020-03-30 13:02:53	Private Jobholder	MGH Group	Dhaka	Male	5	4	5	5	5	4	5	5	5	5	5	5	5	4	5	2	4	2	2	5	5	5	5	5	5	5	5	5	5	5	5	5	5	4	4	5	4	5	5	3	3	5	5	5	5
2020-03-30 13:14:29	Student	Bangabandhu Sheikh Mujibur Rahman science and technology University	Khulna	Male	5	2	2	5	5	5	5	5	5	5	5	4	5	5	5	1	5	1	3	5	5	1	5	5	5	5	4	1	1	4	5	5	3	4	4	5	3	4	3	1	1	5	1	5	4
2020-03-30 13:25:13	Nata abdullah	Gopali	Khalishpur	Male	3	3	4	3	3	3	4	3	4	3	3	3	3	4	3	4	4	4	3	3	3	3	2	3	2	3	2	1	3	1	1	1	1	2	3	2	3	3	3	3	3	2	3	4	2
2020-03-30 13:25:13	Student	Jahangirnagar University	Ashugonj	Female	4	4	4	3	4	5	4	4	5	5	5	5	5	4	5	1	2	1	2	4	4	3	4	4	4	5	5	5	5	5	5	4	4	5	5	5	5	5	4	4	3	5	4	4	4
2020-03-30 13:25:50	CSR Specialist	Bestseller	Dhaka	Female	4	2	4	4	5	5	5	5	5	5	5	5	5	5	5	2	2	1	4	5	5	3	4	5	5	5	5	5	4	5	5	5	5	5	4	5	5	5	5	5	3	5	5	5	5
2020-03-30 13:27:52	Student	Jahangirnagar university	Savar	Male	3	3	4	5	4	4	3	2	3	3	3	3	3	3	3	3	5	2	4	1	4	3	4	3	3	3	3	3	3	3	3	3	3	3	3	3	3	3	2	4	2	3	3	3	3
2020-03-30 13:28:29	Teaching	Jahangirnagar University	Savar, Dhaka	Male	4	4	4	4	4	4	5	4	3	4	3	5	2	4	5	3	4	1	4	5	5	3	5	5	5	5	4	4	4	4	5	5	4	5	5	4	4	5	4	4	5	5	4	5	5
2020-03-30 13:29:53	Teacher	Jahangirnagar University	Savar, Dhaka	Male	3	4	4	5	5	4	1	5	1	5	3	4	5	1	5	4	4	3	2	4	5	2	5	5	5	4	4	4	4	5	5	5	5	5	5	5	5	5	5	3	2	3	3	4	3
2020-03-30 13:36:25	Student	World University of Bangladesh	Dhanmond, Dhaka	Male	5	4	5	4	5	5	5	4	5	5	5	5	5	1	5	4	2	1	2	5	5	4	5	2	2	5	2	5	5	2	5	5	4	5	4	5	5	5	4	4	5	5	2	4	4
2020-03-30 13:38:42	Student	Bangabandhu Sheikh Mujibur Rahman Science and Technology University, Gopalganj.	Pirojpur Sadar	Male	5	5	4	4	5	5	5	5	5	5	5	5	5	4	5	2	3	2	4	5	5	3	5	4	4	5	4	4	3	5	4	5	4	5	5	5	5	5	3	3	2	5	5	4	3
2020-03-30 13:40:40	Student	Jahangirnagar University	Savar, Dhaka	Female	5	5	4	4	4	5	5	5	4	5	5	4	5	5	5	4	2	2	3	4	4	2	4	5	5	5	5	5	5	5	5	4	4	5	5	5	5	5	4	3	3	5	5	5	5
2020-03-30 13:45:59	Student	AIUB	Kuril	Male	4	3	4	2	3	3	4	5	3	4	4	3	4	1	5	3	2	2	3	5	4	3	4	4	4	5	4	4	3	4	3	2	4	5	5	3	3	4	3	5	3	4	4	4	3
2020-03-30 13:50:21	Student	Jahangirnagar University	Savar	Female	5	4	5	4	3	5	5	4	4	5	5	5	5	4	5	2	3	2	3	4	5	3	5	4	5	5	5	5	4	3	5	4	5	5	5	5	5	5	5	5	3	5	4	5	4
2020-03-30 13:51:44	Student	Sher-e-bangla Agricultural University	Sher e bangla nagoar, Dhaka, Bangladeshi	Female	5	5	5	5	5	5	4	5	5	5	5	4	5	4	5	1	2	2	3	3	4	2	3	5	5	5	5	5	5	5	5	4	3	4	4	5	5	4	4	3	3	5	5	5	5
2020-03-30 13:51:56	Student	Sher-e-bangla Agricultural University	Sher e bangla nagoar, Dhaka, Bangladeshi	Female	5	5	5	5	5	5	4	5	5	5	5	4	5	4	5	1	2	2	3	3	4	2	3	5	5	5	5	5	5	5	5	4	3	4	4	5	5	4	4	3	3	5	5	5	5
2020-03-30 13:54:17	ছাত্র	মাগুরা আদর্শ কলেজ	মোহাম্মদপুর, মাগুরা	Male	5	5	5	5	5	3	3	5	5	5	4	4	5	4	4	3	3	4	4	4	4	4	4	4	4	4	4	4	4	4	4	4	4	5	4	5	5	4	4	4	4	5	4	4	5
2020-03-30 13:55:57	student	Jahangirnagar University	Dhaka	Male	4	4	5	5	5	3	5	5	4	5	5	5	5	5	5	2	3	4	5	5	5	5	5	5	4	5	5	5	5	5	5	5	5	4	4	4	3	5	5	3	5	5	5	5	5
2020-03-30 13:56:57	Doctor	NIPSOM	Niketan	Female	4	4	4	4	3	3	5	5	4	5	5	5	5	5	5	3	2	2	3	5	4	3	4	5	5	5	5	5	3	4	5	3	2	4	3	5	3	3	5	3	3	4	4	5	5
2020-03-30 13:57:08	Private Service	Standard group	Dhaka	Male	5	4	4	5	5	5	5	5	5	5	5	5	5	5	5	2	4	3	4	5	5	4	4	5	5	5	5	4	4	3	5	5	3	5	4	5	5	5	5	3	4	5	5	5	5
2020-03-30 13:57:40	Student	Yunnan technology and business university	Mymensingh	Male	2	2	2	3	5	2	2	2	5	5	5	3	3	1	5	4	3	5	3	5	3	5	5	5	5	5	3	5	5	2	5	5	5	5	5	5	5	5	5	5	5	5	5	5	5
2020-03-30 14:00:58	Student	Wub	Dhanmondi	Female	5	5	5	5	5	1	5	5	5	5	5	5	5	3	5	5	1	2	3	2	5	5	4	5	5	5	5	5	5	5	5	5	5	5	5	5	5	5	5	3	5	5	5	5	5
2020-03-30 14:01:46	Student	JahangirnagarUniversity	Gazipur	Female	4	4	5	3	4	5	5	5	2	5	5	5	5	5	5	1	2	2	3	5	5	3	5	5	5	5	5	5	3	3	5	3	2	5	5	5	5	5	5	5	3	5	4	5	5
2020-03-30 14:02:39	Student	Siddheswari Girls' College	New Bailey road , Dhaka	Female	1	1	3	1	3	3	4	1	2	2	2	2	1	2	3	3	3	2	5	5	5	3	5	3	5	5	4	3	1	3	5	5	3	3	5	3	4	3	3	3	3	5	5	4	4
2020-03-30 14:03:24	Student	Jahangirnagar Unuversity	Narsingdi	Female	5	4	4	4	5	5	4	4	4	5	5	5	5	4	5	3	4	3	4	4	5	4	5	5	5	5	5	5	5	5	5	5	5	3	4	5	5	5	4	3	3	5	4	4	5
2020-03-30 14:06:54	Student	Jahangirnagar University	Dhaka	Female	4	3	4	3	3	4	5	4	4	5	5	5	5	3	5	3	2	2	3	4	4	3	5	3	3	4	4	4	3	4	5	3	3	4	3	4	4	4	4	3	3	3	4	4	3
2020-03-30 14:11:48	Senior Programme Assistant	International Union for Conservation of Nature (IUCN), Bangladesh Country Office	Cox's Bazar	Male	4	4	4	4	4	5	5	5	5	5	5	5	5	4	5	3	4	3	3	4	5	5	5	5	5	5	5	4	4	4	4	4	4	5	5	5	5	4	4	4	4	4	4	4	4
2020-03-30 14:13:53	Student	Iubat	Gazipur	Female	5	5	5	5	5	5	5	5	5	5	5	5	5	3	5	2	1	1	3	3	5	3	4	5	1	5	4	5	5	5	5	5	3	5	5	5	5	5	5	5	5	5	5	5	5
2020-03-30 14:15:47	Student	Jahangirnagar University	Savar, Dhaka	Male	3	4	5	5	3	4	3	4	5	5	4	3	5	4	5	2	4	3	3	5	5	3	5	5	5	5	4	4	4	5	5	5	4	3	3	3	3	3	5	3	3	5	4	4	4
2020-03-30 14:15:54	Ph.D. researcher	Kyungpook National University	South Korea	Male	5	5	5	5	5	4	5	5	5	5	4	5	4	5	5	3	2	2	4	5	5	3	5	4	4	5	2	3	4	4	4	5	2	4	4	4	4	4	2	5	3	4	4	4	4
2020-03-30 14:17:10	student	jahangirnagar univetsity	savar	Male	3	5	4	5	5	4	5	5	5	5	4	5	5	4	5	5	4	3	3	4	4	3	5	5	3	5	4	5	5	5	5	5	5	5	4	4	4	5	5	3	4	5	5	5	5
2020-03-30 14:18:36	Private service	TUV SUD Bangladesh Pvt Ltd	Uttara, Dhaka	Male	4	4	4	4	4	4	4	2	4	4	2	2	5	3	5	4	2	2	3	4	4	3	4	4	4	5	3	4	3	4	4	3	3	4	3	4	4	4	4	3	3	4	4	4	4
2020-03-30 14:19:37	student	Jahangirnagar university	savar	Male	5	5	5	4	5	5	5	5	5	5	5	5	5	2	5	4	2	1	3	5	5	4	5	5	5	5	5	5	5	4	5	4	4	5	5	5	5	5	5	5	3	5	4	5	5
2020-03-30 14:19:42	student	Jahangirnagar university	savar	Male	5	5	5	4	5	5	5	5	5	5	5	5	5	2	5	4	2	1	3	5	5	4	5	5	5	5	5	5	5	4	5	4	4	5	5	5	5	5	5	5	3	5	4	5	5
2020-03-30 14:20:05	Student	Jahangirnagar university	Dhaka	Male	5	5	5	4	3	5	5	5	5	5	5	5	5	5	5	1	1	1	1	5	5	4	5	5	5	5	5	5	1	5	5	5	3	5	5	5	5	5	5	5	4	5	3	4	3
2020-03-30 14:21:40	Student	JU	Savar	Female	4	4	5	5	5	5	1	3	2	4	5	5	5	5	5	3	2	3	2	5	5	4	3	5	5	5	5	5	5	5	5	5	5	5	3	3	4	5	5	5	5	5	3	5	5
2020-03-30 14:22:08	Student	National Institute of Textile Engineering & Research (NITER)	Kanaipur, Faridpur	Male	5	3	2	3	4	3	4	5	4	4	3	4	4	3	5	3	3	5	4	5	4	4	4	5	4	5	5	5	5	5	5	5	5	5	4	4	5	4	5	4	3	4	3	3	3
2020-03-30 14:22:59	Student	Jahangirnagar University	Agagaon Dhaka	Male	1	1	1	1	5	3	3	5	4	5	5	5	5	4	3	5	4	4	4	5	5	3	5	5	5	5	5	3	4	5	5	4	4	3	2	2	3	2	4	5	4	5	4	5	4
2020-03-30 14:23:04	student	JU	Dhaka	Male	4	3	5	4	4	5	5	5	5	5	5	5	5	5	5	2	2	2	2	5	5	3	5	5	5	5	4	5	5	5	4	5	3	5	5	5	5	5	5	5	4	5	4	5	5
2020-03-30 14:23:09	Student	Jahangirnagar University	Savar, Dhaka	Female	5	4	5	5	4	5	5	5	5	5	5	5	5	5	5	1	1	1	3	4	5	5	5	3	3	5	5	5	5	5	5	5	5	3	5	5	5	5	4	5	4	5	5	5	5
2020-03-30 14:26:45	Student	Jahangirnagar Universit, Environmental sciences	Savar	Male	5	3	3	5	5	5	5	5	3	5	5	5	5	3	3	3	5	3	5	5	5	3	5	5	5	5	5	5	3	2	5	3	1	5	3	5	5	5	5	2	3	5	3	5	4
2020-03-30 14:27:44	Private service	ITS Labtest Bangladesh Ltd	Mirpur 1, Dhaka	Female	5	4	5	3	5	4	5	5	5	5	5	5	5	5	3	3	4	3	2	4	5	4	4	5	4	4	4	5	5	5	5	5	4	3	4	4	5	4	3	3	2	4	4	5	3
2020-03-30 14:32:04	Student	MIST	Mirpur-12	Male	5	5	5	5	5	5	5	5	5	5	5	5	5	5	5	1	1	1	1	5	5	3	3	5	5	5	5	5	5	5	5	5	5	5	5	5	5	5	5	5	5	5	5	5	5
2020-03-30 14:33:28	Student	University of Chittagong	Naogaon,Rajshahi	Male	4	2	2	4	4	4	4	4	4	4	4	4	5	4	4	2	5	4	4	4	2	2	2	4	4	5	5	5	5	2	4	4	4	3	1	4	4	4	4	2	5	5	5	4	4
2020-03-30 14:34:02	YV	Plan international	Dhaka	Female	5	4	5	4	5	4	5	4	3	5	4	3	4	4	5	3	4	2	3	2	4	4	4	4	4	4	4	5	4	4	4	4	4	4	5	5	4	5	5	4	4	3	4	3	5
2020-03-30 14:35:35	Student	Bangladesh University of businesses and technology	Mirpur	Male	5	3	4	4	4	2	4	4	3	5	5	4	4	5	5	3	3	2	3	5	5	4	5	5	5	5	5	5	4	4	5	5	3	4	4	4	4	4	4	4	4	5	5	5	5
2020-03-30 14:37:16	Student	Tokyo University of Agriculture and Technology	Japan	Female	5	5	5	4	4	5	5	5	5	5	5	5	5	3	5	1	1	1	2	4	5	3	2	5	5	5	5	5	5	5	5	5	4	5	5	5	5	5	4	5	5	5	5	5	5
2020-03-30 14:37:37	Student	World University Of Bangladesh	Dhanmondi	Female	5	5	5	5	5	4	5	5	2	3	4	5	5	2	5	5	3	5	5	5	5	4	5	4	5	5	5	4	5	3	5	2	4	4	5	1	5	4	5	1	5	5	5	5	5
2020-03-30 14:40:07	Student	Jahangirnagar university	Mirpur	Female	2	3	3	2	1	4	4	4	4	4	4	4	5	3	4	4	3	3	3	5	5	4	5	4	4	4	4	4	4	3	4	5	4	3	3	4	4	4	4	3	3	5	5	5	5
2020-03-30 14:40:47	Student	Khulna University	Dhaka	Female	5	4	5	5	4	5	5	5	5	5	5	4	5	4	5	2	4	2	4	5	5	4	5	4	5	5	5	5	5	4	5	5	3	5	5	5	5	4	4	4	4	5	3	4	4
2020-03-30 14:41:10	Student	Jahangirnagar University	Savar	Male	5	4	5	5	5	5	5	5	5	5	5	5	5	5	5	1	3	2	3	5	5	4	5	5	5	5	5	5	5	4	5	5	5	5	5	5	4	5	5	3	4	5	5	5	5
2020-03-30 14:43:15	student	Jahangirnagar University	Savar	Female	4	4	5	5	5	1	5	5	5	5	5	5	5	3	5	1	1	1	1	4	5	4	4	4	5	5	4	4	4	4	4	5	4	4	5	4	5	4	5	4	4	4	4	5	5
2020-03-30 14:44:04	Student	Jahangirnagar University	Savar, Dhaka	Female	5	3	5	4	3	5	5	5	5	5	5	5	4	5	5	1	1	3	1	5	5	3	5	5	5	5	1	5	3	5	5	5	3	5	4	5	5	5	4	4	4	5	5	5	5
2020-03-30 14:44:11	Service	Brac	Barisal	Female	5	2	2	2	4	3	4	4	4	4	4	4	4	2	4	4	4	2	4	5	5	4	4	4	4	5	5	5	4	4	5	4	5	4	3	4	4	3	4	3	4	5	5	4	4
2020-03-30 14:46:45	Student	Jahangirnagar University	Savar, Dhaka	Female	4	4	3	4	3	4	2	4	4	3	4	3	4	4	3	3	3	2	3	4	4	3	5	5	3	5	3	4	4	2	4	5	3	5	5	4	4	3	2	3	3	4	5	5	5
2020-03-30 14:47:20	Associate Professor	Jahangirnagar University	Savar, Dhaka	Male	2	2	1	4	4	5	4	4	4	4	5	4	5	4	5	4	4	2	4	5	5	4	4	4	4	5	2	3	2	4	2	4	2	4	4	4	4	4	4	4	4	4	4	4	4
2020-03-30 14:47:20	Student	JahangirnagarUniversity	Sreenagar, Munshiganj	Female	5	5	5	4	5	5	4	5	4	5	5	5	5	5	5	2	3	2	3	5	4	3	4	5	4	5	4	5	4	5	4	4	4	5	4	5	5	4	4	4	3	5	4	5	4
2020-03-30 14:47:52	Student	Jahangirnagar University	Rangpur	Male	4	4	5	5	5	4	5	5	5	4	5	4	5	2	2	4	4	2	2	5	4	2	5	2	5	5	4	1	2	4	4	4	1	4	4	4	3	4	4	1	4	5	3	5	4
2020-03-30 14:48:07	Student	Sher-e-Bangla Agricultural University	Dhaka	Female	5	4	5	4	5	5	5	5	5	5	5	5	5	5	5	2	3	3	3	5	5	5	4	5	4	5	5	5	4	5	5	5	5	5	4	5	5	5	5	5	5	5	5	5	5
2020-03-30 14:49:43	Student	University women's federation college	Dhaka	Female	5	5	5	5	5	5	5	5	5	5	5	5	5	3	5	1	2	1	3	5	5	3	4	5	5	5	5	5	5	5	5	5	5	5	5	5	5	5	5	5	4	5	5	5	5
2020-03-30 14:49:58	Student	Jahangirnagar Unversity	Savar	Male	4	3	5	4	5	4	5	3	5	5	4	4	5	2	5	2	3	3	2	5	5	4	5	5	5	5	5	3	3	4	5	4	4	4	4	3	5	5	4	3	5	5	5	5	4
2020-03-30 14:50:54	Student	Jahangirnagar University	Dhaka	Male	2	3	3	4	4	4	5	5	5	4	4	4	4	2	4	2	4	1	4	5	5	3	5	5	5	5	5	5	5	5	4	4	2	5	5	5	3	3	3	2	3	5	5	5	5
2020-03-30 14:51:14	Teacher	Stamford University Bangladesh	Siddeswari	Male	4	4	4	3	3	4	4	4	4	4	4	4	4	4	5	2	2	2	2	5	5	3	5	4	4	5	5	5	3	4	4	3	4	3	3	4	3	4	4	3	3	3	3	4	4
2020-03-30 14:51:37	Banker	IFIC bank	Kaliganj	Female	5	5	5	5	5	5	5	5	5	5	5	5	5	5	5	5	5	5	5	5	5	5	5	5	5	5	5	5	5	5	5	5	5	5	5	5	5	5	5	5	5	5	5	5	5
2020-03-30 14:51:37	Student	Jahangirnagar University	Savar, Dhaka	Female	4	4	4	4	4	4	4	4	4	4	4	3	5	4	5	4	2	2	3	4	4	4	4	4	4	5	4	5	4	4	4	4	4	4	4	4	5	4	4	3	3	5	4	4	4
2020-03-30 14:54:11	Student	Jahangirnagar University	Dhaka	Female	5	4	5	5	4	4	4	5	5	5	5	5	5	5	5	2	3	2	2	5	5	3	4	5	5	5	5	4	4	4	5	5	4	4	4	5	5	4	4	4	5	5	5	5	5
2020-03-30 14:54:23	student	Daffodil international University	Sirajgonj	Male	3	3	5	4	5	5	1	1	2	5	5	4	5	5	5	5	3	2	3	5	5	4	5	5	5	5	5	4	4	2	5	5	3	3	5	5	5	4	4	3	1	5	3	5	5
2020-03-30 14:58:40	student	sher-e-bangla agricultural university	sher-e-bangla nagar, dhaka	Female	4	3	5	4	4	5	5	5	4	5	5	5	5	3	5	3	2	1	3	5	5	3	5	4	4	5	5	5	5	4	5	4	5	4	3	4	5	4	5	3	3	5	3	4	4
2020-03-30 15:00:07	Student	JahangirnagarUniversity	Savar	Male	3	3	4	5	4	4	4	5	5	1	1	2	1	5	1	1	1	1	1	1	1	1	4	3	4	4	4	4	3	3	2	1	1	2	3	2	1	3	2	1	2	3	3	3	2
2020-03-30 15:02:15	Student	Jahangirnagar University	Savar,Dhaka	Male	4	5	5	2	5	1	5	4	5	5	5	5	5	4	4	3	5	4	5	5	5	3	5	3	4	5	3	4	4	4	5	2	2	5	4	5	5	5	5	1	3	5	5	5	4
2020-03-30 15:02:44	Managing Director	Bullseye	Uttara	Male	5	3	4	4	5	5	5	5	5	5	5	5	5	4	5	2	2	2	4	5	5	4	5	5	5	5	5	5	4	4	5	5	5	5	5	5	5	5	4	5	3	5	4	5	5
2020-03-30 15:04:54	student	jahangirnagar university	savar, Dhaka	Male	2	2	2	1	5	3	5	5	5	5	5	5	5	5	5	3	5	5	3	4	5	3	4	5	5	5	5	5	5	4	5	5	5	5	3	5	2	5	3	2	2	3	5	3	3
2020-03-30 15:05:30	Student	Jahangirnagar University	Dhaka	Male	3	3	1	5	5	4	5	5	5	5	5	5	5	5	5	2	3	2	3	5	5	3	4	5	5	5	5	3	4	4	5	5	5	5	4	4	4	5	4	4	3	5	5	5	5
2020-03-30 15:06:27	Student	Jahangirnagar University	Savar	Male	4	3	4	3	4	5	5	5	3	5	5	5	5	1	4	1	1	2	3	5	5	3	4	5	5	5	5	5	3	4	4	5	4	4	4	5	4	5	4	2	4	5	5	4	4
2020-03-30 15:08:15	Student	Jahangirnagar University	Savar,Dhaka, Bangladesh	Female	4	5	5	5	4	5	5	4	4	5	5	5	5	4	5	1	2	2	2	4	4	3	4	4	4	5	4	4	4	5	4	4	3	5	5	5	5	5	4	4	3	4	4	4	4
2020-03-30 15:08:35	Student	Sylhet Agricultural University	Sylhet	Female	5	4	2	5	5	4	4	5	4	5	5	5	5	3	5	4	5	4	3	5	5	3	4	5	5	5	4	4	4	5	5	5	2	5	5	5	5	5	5	4	3	5	5	5	5
2020-03-30 15:08:59	Student	Sher-e bangla agricultural University	Fatull, Narayanganj	Female	5	5	5	5	5	5	5	5	5	5	5	5	5	5	5	3	2	2	2	5	5	3	5	5	5	5	5	5	5	5	5	3	3	5	5	5	5	5	5	5	1	4	5	5	5
2020-03-30 15:10:02	Student	IIT,Jahangirnagar university	Savar	Male	4	4	4	5	3	4	4	5	5	5	4	5	5	5	5	2	3	3	4	5	5	5	5	5	5	5	5	5	3	4	5	4	4	5	5	5	5	4	4	3	5	5	5	5	5
2020-03-30 15:10:51	Student	Jahangirnagar University	Louhajong, Munshiganj	Male	5	5	5	5	5	5	5	5	5	5	5	5	5	5	5	1	1	1	1	5	5	3	5	5	5	5	5	5	5	5	5	5	5	5	5	5	5	5	3	5	4	5	5	5	5
2020-03-30 15:13:46	Teacher	Sylhet Agricultural University	Sylhet	Female	3	3	2	3	4	5	3	5	4	5	5	5	5	4	5	3	1	1	2	5	5	3	5	5	5	5	5	5	4	5	5	5	4	5	4	5	3	5	4	3	2	3	4	5	5
2020-03-30 15:15:13	Student	sylhet Agricultural University	sylhet	Male	3	2	4	2	2	5	5	3	3	5	5	5	5	5	4	2	1	1	3	5	5	2	5	5	5	5	3	5	3	3	5	4	5	5	5	5	5	4	3	1	2	5	5	5	5
2020-03-30 15:16:26	Student	Jahangirnagar University	Gazipur	Female	5	3	5	4	4	4	5	5	5	5	5	5	5	2	5	3	2	2	3	5	5	3	5	5	5	5	4	4	5	5	5	4	5	5	5	5	5	5	5	4	4	5	4	4	5
2020-03-30 15:17:16	Student	North south University	dhaka	Male	5	5	5	5	5	5	5	5	5	5	5	5	5	5	5	3	1	1	1	5	5	3	5	5	5	5	5	5	5	5	5	5	5	5	5	5	5	5	5	5	5	5	5	5	5
2020-03-30 15:18:57	Student	Jahangirnagar University	Khulna	Male	4	4	4	5	5	5	5	5	5	5	5	5	4	5	5	1	2	2	3	5	4	4	4	5	5	5	4	5	4	4	5	5	4	4	4	4	5	5	5	4	4	5	5	5	4
2020-03-30 15:19:58	Student	Jahangirnagar University	Savar	Male	4	3	4	4	5	4	5	5	5	4	5	5	4	4	5	2	4	2	4	5	5	4	5	5	5	5	4	4	4	4	4	5	4	4	2	5	5	5	5	2	4	5	4	4	4
2020-03-30 15:19:59	Student	Shahjalal University of Science & Technology, Sylhet	Mymensingh	Male	5	3	4	4	5	5	5	5	5	5	5	5	5	5	5	2	3	3	3	5	5	4	5	4	3	4	3	2	3	4	4	4	2	4	4	4	4	4	4	4	4	4	4	4	4
2020-03-30 15:20:09	Student	Shahjalal University of Science & Technology, Sylhet	Mymensingh	Male	5	3	4	4	5	5	5	5	5	5	5	5	5	5	5	2	3	3	3	5	5	4	5	4	3	4	3	2	3	4	4	4	2	4	4	4	4	4	4	4	4	4	4	4	4
2020-03-30 15:20:27	student	Jahangirnagar University	savar	Female	4	4	5	4	5	5	2	4	5	4	4	5	5	4	5	5	1	3	4	4	4	3	5	4	4	4	4	4	4	3	3	4	5	3	3	3	5	4	4	4	5	5	5	5	5
2020-03-30 15:22:09	Student	JU	Savar	Male	5	3	5	5	5	5	5	4	5	5	4	5	5	2	5	1	3	2	4	5	5	2	5	5	5	5	2	4	2	2	4	5	2	5	5	5	5	5	4	4	4	5	4	5	4
2020-03-30 15:23:23	Student	Sher-e-Bangla agricultural University	Dhaka	Male	2	2	2	3	4	3	4	4	2	3	3	5	2	1	3	5	3	2	4	5	4	3	5	5	4	5	4	3	2	4	4	1	1	4	3	3	3	4	4	4	4	4	3	4	4
2020-03-30 15:23:25	Student	North South University	Dhaka	Male	5	5	5	5	3	5	5	4	4	5	5	5	5	4	5	4	4	2	3	5	5	2	4	4	4	5	5	4	4	3	5	5	4	5	4	5	5	4	4	5	3	4	4	5	4
2020-03-30 15:24:33	student	JahangirnagarUniversity	Savar	Female	5	5	5	5	4	4	4	4	4	4	4	4	4	4	5	5	3	1	2	3	4	4	4	5	5	5	5	5	3	5	5	5	5	5	4	4	5	5	3	3	4	5	5	5	5
2020-03-30 15:26:18	Student	Jahangirnagar University	Savar, Dhaka, Bangladesh	Female	3	4	3	3	5	4	4	5	5	4	4	5	4	4	4	4	4	3	3	5	5	3	3	5	5	5	3	3	4	4	4	4	4	4	3	4	4	4	3	3	3	5	3	4	4
2020-03-30 15:26:37	University Student	BSMRSTU	Gopalganj	Male	4	2	2	3	5	4	5	5	5	5	5	4	5	5	4	4	5	3	4	5	5	3	5	5	5	5	5	5	5	5	5	5	4	4	4	5	5	4	5	3	1	4	4	5	4
2020-03-30 15:28:04	Student	BGMEA University of Fashion & Technology	Mohammadpur,Dhaka	Male	1	1	1	1	1	1	1	1	1	1	1	1	1	1	1	1	1	1	1	1	1	1	1	1	1	1	1	1	1	1	1	1	1	1	1	1	1	1	1	1	1	1	1	1	1
2020-03-30 15:28:36	Engineer	Onnorokom Group	Motijheel	Male	4	3	4	3	2	5	5	5	5	5	5	5	5	4	5	2	2	2	2	5	5	4	5	4	4	4	4	5	4	5	5	2	4	5	5	5	5	5	4	4	4	5	3	4	5
2020-03-30 15:30:15	Project manager	Bcmcl	Dinajpur	Male	4	5	5	5	3	4	5	5	4	5	5	5	5	4	5	3	4	4	4	5	5	4	5	5	5	5	5	5	4	5	5	4	4	4	5	5	5	5	5	4	2	3	4	5	5
2020-03-30 15:30:40	Student	Brac university	Mirpur	Male	4	4	5	3	5	5	5	5	4	4	4	5	5	5	5	1	3	4	3	5	5	3	5	5	5	5	5	4	4	3	5	5	4	3	3	4	5	5	4	3	3	5	5	5	5
2020-03-30 15:30:40	Student	Begum Rokeya University, Rangpur	Belkuchi,Sirajgonj	Female	5	4	5	3	4	5	5	5	4	4	4	4	4	4	5	4	5	3	4	5	5	4	5	5	5	5	5	5	5	5	5	5	4	4	4	4	4	5	4	4	4	5	5	5	5
2020-03-30 15:31:03	Teaching	Comilla University	Comilla, Bangladesh	Male	2	2	2	4	5	5	5	5	5	5	5	5	5	4	5	1	4	2	5	5	5	3	5	5	5	5	5	5	5	5	5	5	5	5	4	5	5	5	5	3	5	5	3	5	5
2020-03-30 15:31:23	Teaching ( Associate Professor)	Jahangirnagar University	Savar, Dhaka-1342	Female	5	3	3	5	5	4	5	4	4	5	5	5	5	4	5	3	5	5	4	5	4	3	5	5	5	5	5	5	4	4	4	4	4	5	5	5	5	5	5	1	2	5	3	5	4
2020-03-30 15:34:21	Student	Jahangirnagar University	Keraniganj	Male	4	3	5	4	2	3	4	4	4	5	5	4	5	4	5	2	2	2	3	5	4	4	4	3	3	3	3	4	3	3	3	3	4	3	3	3	3	4	3	3	3	3	3	3	3
2020-03-30 15:35:12	Student	Sylhet Agricultural University	Sylhet	Female	5	3	5	5	4	5	5	5	5	5	5	5	5	5	5	1	3	1	1	5	5	2	5	5	5	5	5	5	5	5	5	5	5	5	5	5	5	5	5	5	5	5	5	5	5
2020-03-30 15:35:18	Student	Metropolitan university	Sylhet	Female	4	4	5	5	5	4	5	5	4	4	4	4	5	5	5	2	2	2	4	5	5	5	5	5	5	5	5	5	5	5	5	5	4	5	5	5	5	5	5	5	5	5	5	5	5
2020-03-30 15:35:24	Student	Begum Rokeya Universit, Rangpur	Rangpur	Male	5	3	3	3	3	5	5	5	4	5	4	5	5	5	5	2	2	2	3	5	5	3	5	4	4	5	5	4	5	5	5	5	4	5	5	5	5	5	4	5	4	5	5	5	5
2020-03-30 15:35:29	Student	ju	saver, dhaka	Male	4	3	2	4	4	5	4	3	4	5	5	4	5	4	5	1	1	2	3	2	5	4	5	4	5	5	5	4	3	4	5	5	4	4	4	5	5	4	5	5	5	5	4	5	4
2020-03-30 15:36:43	Teacher	BUET	Science Lab	Male	4	4	2	4	4	5	5	5	3	5	5	5	5	5	5	2	2	2	3	4	4	3	4	4	4	5	4	5	2	2	5	4	4	5	5	5	5	5	4	4	2	5	3	5	5
2020-03-30 15:38:15	Student	Jahangirnagar University	Savar,Dhaka	Male	5	4	4	4	5	5	4	5	5	5	5	4	5	5	5	3	2	1	3	5	5	2	4	4	4	5	4	4	3	4	5	4	3	4	4	5	4	4	3	3	2	5	4	5	3
2020-03-30 15:38:26	Student	JU	Sakhipur	Male	5	3	3	4	5	5	5	5	5	5	5	5	5	5	5	4	3	1	5	5	5	3	3	5	5	5	5	5	3	4	5	5	4	5	4	5	5	5	4	4	4	5	5	5	5
2020-03-30 15:38:39	nothing	nothing	birganj,dinajpur	Male	2	2	4	5	5	1	1	5	5	5	5	5	5	5	5	2	1	1	3	1	2	1	1	1	1	1	2	2	2	1	1	1	1	1	1	1	1	1	2	1	1	1	5	1	1
2020-03-30 15:40:30	Student	University of Dhaka	Dhaka	Female	3	2	2	4	5	5	5	5	4	5	5	5	5	4	5	3	2	1	2	5	5	5	3	4	5	5	5	5	5	5	5	5	5	5	5	5	5	5	5	5	4	5	5	5	5
2020-03-30 15:42:05	Development worker	Oxfam in Bangladesh	Dhaka	Female	5	4	5	5	4	4	5	4	3	5	5	5	5	3	4	2	3	2	4	5	5	4	5	4	5	5	5	5	3	4	4	4	4	5	4	5	4	4	5	5	3	5	4	5	5
2020-03-30 15:42:20	Student	Jahangirnagar university	Savar, uttara	Female	1	1	1	1	5	5	5	5	5	5	5	5	5	5	5	2	3	3	3	5	5	3	5	4	5	5	5	5	5	5	5	5	5	3	4	2	5	5	5	5	5	5	5	5	5
2020-03-30 15:42:21	Student	Sylhet Metropolitan University	Monirampur, Jessore	Male	4	3	2	4	3	5	5	4	5	5	5	5	5	4	5	2	4	1	3	5	5	5	5	3	4	5	5	4	3	3	3	5	3	5	4	5	5	5	4	4	5	5	5	5	5
2020-03-30 15:42:41	Job	ACI	Bogra	Male	5	5	5	5	5	5	5	5	5	5	5	5	5	5	5	1	1	1	2	5	5	2	5	4	5	5	5	5	5	5	5	5	5	5	5	5	5	5	5	3	5	5	5	5	5
2020-03-30 15:43:22	Student	Jahangirnagar University	Munshiganj	Female	4	3	4	3	1	2	5	4	4	5	4	5	5	4	5	1	4	3	2	4	5	4	4	3	3	5	4	4	3	2	4	4	2	4	5	5	5	4	3	5	3	5	4	4	4
2020-03-30 15:43:24	Student	Jahangirnagar University	Tetulia, Panchagarh	Male	2	2	2	4	4	4	4	5	4	4	4	4	4	2	4	4	4	4	4	5	5	5	5	4	3	4	4	3	2	2	4	4	4	4	2	4	4	4	4	4	3	4	3	4	4
2020-03-30 15:44:13	Student	University of Dhaka	Rangpur	Male	2	3	4	5	5	5	5	4	4	5	5	5	5	2	5	4	3	1	4	5	5	3	4	4	4	5	4	4	4	4	4	4	3	5	5	5	5	5	5	4	4	5	5	5	5
2020-03-30 15:44:29	Service Holder	IFIC Bank Ltd.	Dhaka	Female	5	5	5	2	2	2	2	3	4	4	4	3	4	3	5	3	5	5	4	5	5	4	5	4	3	5	5	4	4	4	4	3	3	4	4	4	4	4	4	3	3	4	4	4	4
2020-03-30 15:44:54	Medical student	Rangpur Medical College	Rangpur	Male	4	4	3	3	1	4	3	4	4	4	4	4	5	5	4	3	3	3	4	5	5	4	4	4	4	5	4	4	4	4	5	5	4	4	3	5	4	5	5	4	4	5	4	3	3
2020-03-30 15:46:32	Student	Bangladesh University Of Professionals	Mirpur-7, Dhaka, Bangladesh.	Male	4	4	4	3	4	5	5	4	4	4	5	4	5	3	5	4	2	2	2	4	4	3	5	4	4	5	4	4	4	5	4	4	4	4	3	4	4	4	3	5	3	5	5	5	4
2020-03-30 15:47:20	Teaching	Diu	Dhaka	Female	5	5	4	5	5	3	5	5	5	5	5	5	5	3	3	3	3	3	3	3	3	3	5	5	5	5	5	5	5	5	5	5	3	4	5	5	5	5	5	5	5	5	5	5	5
2020-03-30 15:47:42	Student	BRAC University	Mirpur 2	Male	5	5	5	4	4	5	5	3	5	5	5	5	5	4	5	3	5	4	4	5	5	3	5	4	4	5	5	5	1	2	5	5	3	5	3	3	5	5	3	1	4	5	2	4	5
2020-03-30 15:48:47	Student	Jahangirnagar University	Rangpur	Female	4	4	5	5	5	4	4	3	5	4	3	5	5	5	5	4	4	4	4	4	4	5	5	5	5	5	5	5	5	5	5	5	5	4	4	4	4	5	4	4	4	4	4	4	3
2020-03-30 15:49:10	Student	Department of urban and regional planning, Jahangirnagar University	Savar, Dhaka	Female	4	4	5	4	5	4	4	4	4	5	5	5	5	4	5	3	2	2	3	5	4	4	5	4	4	5	4	4	4	4	5	5	4	5	4	5	5	4	5	4	3	4	4	5	5
2020-03-30 15:49:53	Student	Begum Rokeya University, Rangpur.	Keshabpur, Jashore	Male	5	4	4	5	5	5	5	4	5	5	5	5	5	4	5	4	2	1	4	5	5	3	5	4	4	5	3	5	4	4	5	5	3	5	4	5	5	4	5	4	4	5	5	5	4
2020-03-30 15:50:28	Researcher	University of Rajshahi	Rajshahi	Male	4	4	4	5	5	5	4	4	3	5	5	4	5	3	5	2	3	2	4	5	5	4	5	4	5	4	4	5	5	3	5	4	2	5	5	5	5	5	4	5	3	5	3	5	5
2020-03-30 15:51:12	Student	Noakhali Science & Technology University	Dhaka	Male	4	4	4	3	4	5	5	4	5	5	5	5	5	5	5	1	2	2	4	5	5	4	4	5	5	5	5	5	3	3	5	5	5	5	5	5	4	5	3	5	3	5	3	5	4
2020-03-30 15:51:26	Student	Begum Rokeya University, Rangpur	Rangpur	Male	4	4	3	3	4	5	4	5	4	5	4	5	5	5	2	1	3	2	3	5	5	3	5	5	5	5	5	5	1	2	4	4	1	5	3	5	5	5	4	3	5	5	4	5	4
2020-03-30 15:52:22	Electrical Engineer	Viyellatex Group	Gacha, Gazipur	Male	5	4	5	2	2	5	4	5	4	5	5	5	5	4	4	1	2	2	2	5	5	3	5	4	4	5	2	4	4	4	4	5	3	5	5	5	5	5	5	5	3	5	5	5	5
2020-03-30 15:52:43	ছাত্র	বেগম রোকেয়া বিশ্ববিদ্যালয়, রংপুর	রংপুর,বাংলাদেশ	Male	4	5	5	4	5	4	4	4	5	4	4	4	5	4	5	3	3	2	4	5	5	3	5	5	5	5	3	3	4	4	5	4	3	4	4	4	4	4	4	3	3	4	5	5	5
2020-03-30 15:54:13	student	Bangladesh University of Professionals	Mirpur, Dhaka	Female	4	4	5	5	3	5	5	5	5	5	5	5	5	4	4	3	1	1	3	4	5	3	4	5	4	5	4	4	4	5	5	4	4	5	4	5	5	5	5	5	4	5	4	5	3
2020-03-30 15:55:00	Lecturer	Begum Rokeya University	Pabna	Male	5	5	5	5	5	5	2	4	5	5	5	4	4	4	5	4	4	2	2	5	5	3	2	5	5	5	5	5	2	4	4	5	5	5	5	5	5	5	5	5	2	5	5	5	5
2020-03-30 15:55:03	Agree	Beguma Rokeya University Rangpur	Parbatipur Dinajpur	Male	1	2	3	5	3	5	4	5	5	4	4	5	5	4	5	2	2	2	2	5	5	5	5	3	5	3	5	3	4	4	4	4	3	4	3	4	2	4	4	5	4	5	4	5	4
2020-03-30 15:56:00	Student	Sylhet Agricultural University	Sylhet Agricultural University	Female	4	2	3	4	3	3	4	4	4	4	3	4	4	4	4	3	3	3	3	5	5	4	4	4	5	5	4	4	4	5	4	5	5	4	4	4	4	4	3	3	4	3	3	4	4
2020-03-30 15:56:30	Student	Metropolitan University	Sylhet	Male	4	4	4	3	4	1	5	5	4	5	5	5	5	5	5	1	1	1	1	4	5	3	5	4	5	5	4	4	5	5	5	5	4	5	4	5	5	4	4	5	3	5	5	5	5
2020-03-30 15:56:32	Primary School Teacher	Govt. Primary School	Shatibari, Mithapukur, Rangpur	Female	3	2	3	3	4	3	4	5	2	4	5	5	4	4	4	2	3	3	2	5	5	4	5	4	4	5	4	5	5	4	4	5	3	5	4	5	5	5	4	3	4	5	4	4	5
2020-03-30 15:56:33	Private job holder	Praava health	Banani, Dhaka	Female	4	3	5	4	5	5	5	5	4	5	5	4	5	4	5	1	2	1	2	3	4	3	4	5	5	5	5	5	5	5	5	3	4	5	5	5	5	5	4	5	4	5	5	5	5
2020-03-30 15:57:44	Student	Sylhet Agricultural University	Sylhet	Female	3	2	2	4	4	4	5	5	4	4	5	5	3	3	5	4	2	2	2	4	5	4	4	4	5	5	2	4	4	4	5	4	4	3	3	4	3	5	5	4	4	4	3	3	3
2020-03-30 15:58:25	Student	Bangladesh University of Professionals	Current location Dinajpur	Female	4	3	3	4	3	5	5	5	5	5	5	5	5	4	5	1	1	1	2	5	5	2	5	5	5	5	5	5	5	5	5	5	5	5	5	5	5	5	5	5	5	5	5	5	5
2020-03-30 15:59:46	student	Jahangirnagar University	Dhaka	Female	4	3	4	5	4	5	2	5	5	5	5	5	5	3	5	1	2	1	4	5	5	3	5	5	5	5	5	5	5	4	5	5	3	5	4	5	5	5	5	4	3	5	5	5	5
2020-03-30 16:00:20	Student	Kazi Azimuddin University	Mirpur 12.Dhaka	Male	4	5	5	5	5	4	5	5	5	5	5	5	5	5	5	4	2	2	3	4	5	4	5	4	4	5	5	5	4	5	4	4	4	3	5	4	4	5	4	4	4	4	3	5	4
2020-03-30 16:02:40	Student	Sylhet Agricultural University	Sylhet	Male	4	4	4	5	5	5	5	5	5	5	5	4	5	5	5	1	2	1	4	5	5	2	5	4	4	5	4	4	4	4	4	4	4	4	3	5	5	4	4	3	3	5	4	4	4
2020-03-30 16:04:29	Student	Begum Rokeya University Rangpur	Chakmukter, Naogaon Sadar, Naogaon	Male	2	2	3	2	5	4	5	5	5	5	5	5	5	5	5	2	3	2	2	5	5	3	5	2	5	5	5	5	5	5	5	5	3	4	4	5	5	5	5	3	5	5	5	5	5
2020-03-30 16:04:59	Student	JahangirnagarUniversity	Savar,Dhaka,Bangladesh	Female	5	5	5	2	4	5	5	5	3	5	5	5	5	3	5	2	2	2	5	5	4	4	4	4	4	5	4	4	3	3	5	5	2	5	5	5	5	4	3	2	4	5	4	4	4
2020-03-30 16:05:13	Student	Sylhet Agricultural University	Dhaka, Bangladesh	Male	3	4	3	2	5	3	5	5	5	5	5	5	5	5	5	2	3	2	3	5	5	3	5	5	5	5	5	5	5	5	5	5	4	5	5	5	5	5	5	4	3	5	5	5	5
2020-03-30 16:06:28	Student	American International University Bangladesh (AIUB)	Dhaka	Male	2	3	4	5	2	3	5	5	4	5	3	2	4	5	3	3	4	3	5	3	3	5	5	5	5	5	5	5	5	5	5	5	5	4	5	4	4	4	5	4	1	4	3	3	4
2020-03-30 16:06:34	Student	Begum Rokeya University	Rangpur	Female	4	4	4	5	5	5	5	5	5	5	5	5	5	5	5	3	3	3	5	5	5	4	5	5	5	5	5	5	5	5	5	5	5	4	3	5	5	5	5	4	3	5	5	5	5
2020-03-30 16:06:44	Lecturer	DUET	Gazipur	Male	4	5	5	5	4	5	5	5	5	5	5	5	5	5	5	4	3	2	3	5	5	4	5	5	5	5	5	4	5	4	5	5	4	5	4	4	4	4	5	4	4	5	5	5	5
2020-03-30 16:07:35	student	Jahangirnagar University (IR)	Savar, dhaka	Male	3	1	4	2	2	4	4	4	4	4	4	4	4	2	2	4	4	4	4	4	4	4	4	3	4	4	4	3	2	3	4	4	4	4	4	3	3	4	4	3	2	4	4	2	2
2020-03-30 16:11:24	Teaching	Shahjalal University of science & Technology	Stlhet	Male	2	3	3	3	5	5	3	5	5	5	5	5	5	5	5	1	1	1	2	5	5	3	5	5	5	5	5	5	5	5	5	5	3	5	5	5	5	5	5	5	5	5	3	5	5
2020-03-30 16:11:39	University Teacher	University of Rajshahi	Rajshahi	Male	5	5	4	5	3	5	5	5	5	5	5	5	5	5	5	1	4	1	4	5	5	2	5	5	5	4	5	4	2	4	2	5	4	5	5	5	5	5	5	5	4	5	3	5	3
2020-03-30 16:14:50	Service	University of Liberal Arts Bangladesh (ULAB)	Dhaka	Male	5	4	5	5	4	2	5	4	5	5	5	5	4	5	5	2	3	2	2	5	5	3	5	5	5	5	5	5	4	4	5	5	5	4	5	5	5	5	5	3	4	5	4	5	3
2020-03-30 16:15:05	Student	Lalmonirhat govt College	Lalmonirhat	Male	5	4	4	4	4	4	4	5	4	4	4	3	4	4	4	2	4	2	4	4	4	4	4	4	4	5	5	4	4	4	5	4	5	5	4	3	4	3	4	4	4	3	4	4	4
2020-03-30 16:15:54	Student	Bangabandhu Sheikh Mujibur Rahman Science and Technology University.	Gopalganj	Male	5	5	5	5	4	5	5	4	4	5	5	5	5	5	4	5	2	1	3	5	5	4	5	5	4	4	4	3	4	4	5	4	4	5	5	5	5	4	4	5	5	5	3	5	4
2020-03-30 16:16:23	Student	Jahangirnagar University	Savar, Dhaka, Bangladesh	Male	4	3	2	5	5	5	5	4	5	5	5	4	5	5	5	5	4	3	4	5	5	4	5	5	5	5	5	5	5	5	5	5	3	5	4	5	5	3	4	5	4	5	4	4	5
2020-03-30 16:16:33	Student	Sher-e- Bangla Agricultural University	Shere bangla nogor	Male	4	3	4	4	5	5	5	5	5	5	5	5	5	5	5	3	4	4	4	4	4	4	4	4	4	5	5	5	5	4	5	5	5	4	4	4	5	4	5	4	4	4	4	5	5
2020-03-30 16:17:51	Teaching	SUST	Sylhet	Male	5	5	4	5	5	5	5	4	5	5	5	5	5	3	5	1	1	1	1	5	3	4	5	5	5	5	5	4	4	5	5	4	3	4	4	5	5	5	5	5	5	5	5	5	5
2020-03-30 16:18:55	Student	Jahangirnagar University	Savar	Female	5	4	5	5	5	5	5	5	5	5	5	5	5	4	5	4	4	1	4	5	5	5	5	5	5	5	5	5	5	5	5	5	5	5	5	5	5	5	5	5	3	5	5	5	5
2020-03-30 16:19:05	Teaching	Patuakhali Science and Technology University	Patuakhali	Male	4	5	5	5	5	5	5	5	5	5	5	5	5	5	5	3	4	3	3	3	3	3	4	4	4	4	4	4	4	5	5	5	4	5	3	4	4	5	5	5	4	4	4	4	4
2020-03-30 16:19:08	ব্যবসায়	গ্রাম থেকে লিমিটেড	মিরপুর	Male	5	5	5	5	5	4	4	4	4	4	4	4	4	3	4	3	3	2	3	5	4	3	5	5	5	5	5	4	4	4	4	4	5	4	3	3	3	4	4	3	3	5	3	5	4
2020-03-30 16:19:12	Student	Jahangirnagar University	Savar	Female	5	4	5	5	5	5	5	5	5	5	5	5	5	4	5	4	4	1	4	5	5	5	5	5	5	5	5	5	5	5	5	5	5	5	5	5	5	5	5	5	3	5	5	5	5
2020-03-30 16:19:48	Student	Daffodil International University	Bogura	Male	5	5	4	5	4	5	5	4	5	5	5	5	5	4	5	2	2	1	2	5	5	3	5	5	5	5	5	4	5	5	5	5	3	5	5	5	5	5	5	5	5	4	5	5	5
2020-03-30 16:19:50	Student	Jagannath University	Magura	Female	5	5	5	5	4	5	5	5	5	4	5	4	5	4	5	2	2	1	3	4	5	5	4	5	4	5	4	5	4	4	5	4	5	5	4	5	5	5	4	3	4	4	5	5	5
2020-03-30 16:20:49	student	JU	Ju,savar,Dhaka	Male	3	3	2	3	3	5	4	3	3	3	4	4	3	4	3	4	3	3	3	4	3	2	4	3	3	4	3	3	4	4	3	5	3	4	3	3	3	3	4	2	2	3	5	3	3
2020-03-30 16:22:00	Student	Ju	Dhaka	Male	4	3	3	4	5	5	5	5	5	5	5	5	5	5	5	3	3	1	1	5	5	5	1	5	5	5	5	5	5	4	4	5	4	5	5	5	5	5	4	5	5	5	4	4	4
2020-03-30 16:22:15	Student	Sylhet agricultural university	Sylhet	Female	5	5	5	5	5	5	5	5	5	1	5	5	5	5	5	1	5	1	1	5	5	1	5	5	5	5	5	5	5	5	5	5	2	5	4	5	5	5	4	3	5	5	5	5	5
2020-03-30 16:24:34	Teaching	Begum Rokeya Universit, Rangpur	Rangpur	Male	4	3	3	4	5	5	5	5	5	5	5	5	5	4	4	4	4	4	5	5	5	5	5	3	4	4	5	3	3	4	2	2	3	5	5	4	4	4	4	2	3	5	5	5	5
2020-03-30 16:26:08	Student	Jahangirnagar University	Dhaka	Male	5	5	5	5	5	5	5	5	5	5	5	5	1	5	5	1	3	2	4	5	5	2	5	5	5	5	5	5	5	3	4	5	3	5	5	5	5	5	3	5	4	5	5	5	5
2020-03-30 16:26:22	Teacher	Chittagong University of Engineering & Technology	Chittagong	Male	4	2	3	4	5	5	5	5	3	5	5	5	5	1	4	2	1	2	3	5	5	2	5	4	4	5	5	4	1	5	5	1	1	5	4	5	5	4	4	5	1	2	1	2	4
2020-03-30 16:26:36	Student	Begum rokeya university	Rangpur	Male	5	5	4	4	5	3	5	5	4	3	5	4	5	5	5	5	4	5	3	3	3	4	4	5	5	5	5	5	4	5	5	4	4	5	5	5	5	5	5	5	4	4	4	4	5
2020-03-30 16:26:39	student	Jagannath University	narinda, dhaka	Male	4	3	3	4	4	2	4	5	4	4	4	4	4	3	4	3	4	2	4	5	4	4	5	5	5	5	5	5	5	4	5	5	5	4	3	4	4	4	4	2	3	4	4	4	4
2020-03-30 16:27:34	Lecturer	Jahangirnagar University	Savar, Bangladesh	Female	5	5	5	5	5	5	5	4	5	5	5	5	5	5	5	1	3	2	2	5	5	3	5	5	5	5	5	4	5	5	5	5	5	5	5	5	5	5	5	4	4	5	4	5	5
2020-03-30 16:27:45	Student	Bangabandhu Sheikh Mujibur Rahman Science and Technology University, Gopalgonj	Kaligonj,Jhenaidah	Female	4	3	4	3	2	2	4	5	3	3	4	3	5	4	5	2	2	2	3	5	5	2	5	4	3	1	1	1	3	4	5	4	4	3	4	5	5	4	4	2	1	5	4	5	3
2020-03-30 16:28:09	Student	Jahangirnagar University	Savar	Male	4	2	2	4	4	2	4	3	4	4	4	4	5	4	4	1	4	3	3	4	5	4	4	4	4	5	4	4	2	4	5	4	4	3	2	4	4	4	3	3	3	3	3	3	3
2020-03-30 16:30:14	Student	JU	Savar	Male	5	5	5	1	4	5	5	5	5	5	5	5	5	5	5	3	5	3	4	5	5	3	5	5	5	5	2	2	5	5	5	5	2	3	5	5	5	5	4	3	3	5	5	5	5
2020-03-30 16:31:44	Student	Jahangirnagar University	Dhaka	Female	4	4	4	4	4	2	4	4	5	5	5	5	5	5	5	4	5	2	4	5	5	4	5	5	5	5	4	5	3	4	4	5	4	5	5	5	5	5	4	3	3	5	3	5	5
2020-03-30 16:32:43	Associate professor	Dhaka City College	Dhanmondi 2, Dhaka	Male	4	4	3	4	5	5	4	4	4	4	5	5	5	4	5	2	2	2	4	5	5	4	5	4	5	5	5	5	4	4	5	5	4	4	5	4	4	5	5	4	5	5	4	5	5
2020-03-30 16:33:21	Student	Bangladesh University of Professionals	Dhaka Cantonment	Female	4	4	4	4	5	4	5	5	4	4	4	3	4	5	1	2	2	4	4	5	4	2	4	5	5	5	2	5	4	4	5	5	4	4	4	4	5	4	5	3	4	5	4	5	4
2020-03-30 16:35:05	Student	Jahangirnagar University	Saver,Dhaka	Male	5	3	3	5	5	5	5	5	5	5	5	5	5	5	5	1	3	1	3	5	5	5	5	5	5	5	5	5	5	5	5	5	5	5	5	5	5	5	5	5	5	5	5	5	5
2020-03-30 16:35:32	Student	Jahangirnagar University	Savar, Dhaka	Female	4	5	5	4	3	4	4	5	5	5	5	5	5	5	5	3	2	1	2	3	4	3	5	5	4	5	5	5	3	5	4	5	4	4	4	5	5	4	4	5	5	5	5	5	5
2020-03-30 16:35:46	Student	Bangladesh University of professionals	Dhaka	Female	5	4	4	5	4	5	5	5	4	5	5	5	5	4	5	4	2	2	3	4	5	3	5	5	5	5	4	5	4	4	5	3	3	5	5	5	5	4	3	5	4	5	5	5	5
2020-03-30 16:37:42	Student	National University	Dhaka, Bangladesh	Male	5	5	5	5	4	5	5	5	5	5	5	5	5	5	5	3	1	1	1	3	5	5	5	4	5	4	5	5	5	5	5	5	5	3	5	5	5	5	5	5	5	5	5	5	5
2020-03-30 16:38:12	University faculty	DUET	Gazipur	Male	4	5	5	5	5	4	4	5	5	5	5	5	5	4	4	2	5	3	5	3	5	2	5	5	5	5	5	5	4	5	5	5	5	5	4	4	4	5	4	5	3	5	5	4	5
2020-03-30 16:39:19	Public University Teacher	BUET	Dhaka	Male	5	4	3	4	3	5	4	4	5	5	5	5	5	3	5	1	3	3	3	5	5	3	3	5	4	5	4	4	4	4	5	3	4	4	4	5	4	4	3	3	5	5	4	5	4
2020-03-30 16:40:23	Student	Begum Rokeya University,Rangpur	Rangpur	Male	5	5	4	5	5	4	4	4	5	5	5	5	5	3	5	3	2	2	3	4	5	3	5	5	5	5	4	3	4	4	5	5	2	4	4	3	4	5	4	4	2	5	5	5	5
2020-03-30 16:40:49	Student	BUP	Mirpur cantonment, dhaka 1216	Male	5	5	5	5	5	5	5	5	5	5	5	5	5	5	5	1	1	1	2	5	5	4	5	4	4	5	5	5	5	5	5	4	5	5	5	5	5	5	5	4	5	5	5	5	5
2020-03-30 16:41:08	Student	Jahangirnagar University	Dhaka	Male	2	4	4	2	5	4	5	4	4	4	4	4	5	4	5	4	4	4	4	5	5	3	5	4	4	5	3	3	4	4	4	4	3	4	2	3	3	3	4	2	3	3	3	3	3
2020-03-30 16:43:28	Student	Begum Rokeya Universit, Rangpu.	Parkmor, Rangpu.	Male	1	1	3	5	5	3	4	5	3	4	3	4	5	1	5	2	4	5	5	5	5	5	5	5	5	5	5	4	3	5	5	5	1	4	5	5	5	5	5	3	3	5	5	5	5
2020-03-30 16:47:58	Student	Bangabandhu Sheikh Mujibur Rahman Science & Technology University, Gopalgonj-8100	Khulna	Male	5	4	5	5	4	5	5	4	2	5	4	5	5	5	5	1	1	1	4	5	5	3	5	5	5	5	5	5	5	5	5	5	5	5	5	5	5	5	5	5	5	5	5	5	5
2020-03-30 16:48:30	Student	Jahangirnagar University	Savar, Dhaka	Male	5	5	5	3	5	5	5	5	5	5	5	3	5	5	5	5	5	3	3	5	5	1	5	5	4	5	5	5	5	5	5	5	4	5	5	3	5	5	5	1	3	5	5	5	5
2020-03-30 16:49:51	Student	Begum Rokeya University Rangpur	Rangpur	Female	5	5	5	5	5	5	4	5	5	5	5	5	4	5	5	3	4	4	5	5	5	5	5	4	4	5	5	4	4	5	5	5	5	4	5	4	5	5	5	5	2	3	5	5	5
2020-03-30 16:51:52	Student	Begum Rokeya University, Rangpur	Park Mor, Rangpur -5400	Female	3	4	5	5	5	5	5	5	5	5	5	4	5	3	5	1	3	2	4	5	5	3	5	5	5	5	5	5	5	4	4	4	3	5	5	5	5	5	4	3	5	5	4	4	5
2020-03-30 16:53:20	Student	Jahangirnagar University	Dhaka	Male	4	4	5	4	5	5	5	5	4	5	5	4	5	4	5	2	1	1	3	4	5	4	4	5	5	5	5	5	4	4	5	5	5	4	4	4	4	5	4	5	5	4	4	5	5
2020-03-30 16:54:47	Student	H.S.T.U.	Rangpur	Male	4	4	4	3	5	5	5	5	5	5	5	5	5	4	5	2	3	2	4	4	4	3	4	5	5	5	5	5	4	5	5	5	5	5	5	5	5	5	4	5	5	5	5	5	5
2020-03-30 16:55:53	Student	Jagannath University	Bhadail, Ranisongkail, Thakurgaon	Male	4	4	4	2	4	5	4	4	4	5	5	4	5	5	5	2	2	2	4	5	5	3	4	4	4	5	5	4	4	4	4	4	3	4	4	5	5	4	4	5	3	5	5	4	4
2020-03-30 16:56:19	Student	University of Dhaka	Bangladesh	Female	5	4	5	1	2	5	5	5	3	3	2	5	5	1	5	4	1	1	3	4	5	2	4	5	3	5	5	5	4	5	5	5	3	4	4	5	3	4	4	5	5	5	5	4	3
2020-03-30 16:58:07	Assistant Upazila Education Officer	Department of Primary Education	Savar, Dhaka	Female	5	5	5	3	3	5	5	5	5	5	5	5	5	5	3	1	1	2	2	4	3	3	5	5	4	5	4	4	3	3	3	3	3	5	5	5	5	5	3	5	3	3	3	5	4
2020-03-30 16:58:41	Student	JahangirnagarUniversity	Tangail	Female	1	2	3	1	1	5	4	4	5	4	5	4	4	2	5	5	2	1	2	5	5	4	5	5	5	5	3	4	4	5	5	5	4	4	2	5	5	5	2	4	2	4	5	5	5
2020-03-30 16:59:23	Student	East west medical College	Ashulia	Female	5	4	5	4	5	4	4	5	5	5	5	5	5	4	5	4	1	1	1	5	5	4	5	5	4	5	4	4	5	5	5	4	4	5	5	5	4	5	4	1	4	5	5	5	5
2020-03-30 17:02:58	Student	Jahangirnagar University	Savar,Dhaka,Bangladesh	Male	3	3	3	3	5	5	3	2	4	4	5	4	5	2	5	3	4	1	5	4	5	5	5	5	5	5	5	5	4	4	5	5	3	5	3	5	5	5	5	5	3	5	5	5	5
2020-03-30 17:08:01	Student	Begum Rokeya University, Rangpur	Rangpur Division	Male	4	5	3	4	4	3	5	4	5	5	4	5	5	3	4	1	4	2	5	5	4	3	5	4	4	5	3	3	4	4	5	4	3	3	5	3	4	4	3	4	3	4	4	4	4
2020-03-30 17:08:18	Jobless	Home	Mirpur	Female	4	3	4	1	4	5	5	5	5	5	5	5	5	5	5	2	4	2	2	4	5	5	5	5	4	5	5	5	2	3	5	4	4	4	4	4	4	5	5	4	3	5	4	5	5
2020-03-30 17:09:08	Student	Jahangirnagar University	Savar, Dhak, Bangladesh	Female	3	1	1	1	3	4	4	5	5	5	4	5	5	5	5	3	2	2	2	5	5	4	5	5	5	5	5	5	5	4	5	5	4	3	2	4	5	2	4	2	3	3	4	5	5
2020-03-30 17:13:01	Student.	Begum Rokeya University.	Radhabollov,Rangpur,Bangladesh.	Male	5	5	4	4	5	4	5	4	4	5	4	4	5	2	3	3	4	4	3	5	5	3	5	4	5	5	4	3	2	5	4	5	3	4	3	4	4	4	5	5	3	4	4	4	4
2020-03-30 17:13:53	Student	Sylhet Agriculture University	Sylhet	Female	5	5	5	5	5	5	5	1	1	1	1	3	1	1	1	5	5	5	5	5	5	5	5	5	5	5	5	5	5	5	5	5	5	2	1	1	1	3	5	1	5	5	5	5	5
2020-03-30 17:20:13	student	Jahangirnagar university	Savar,Dhaka	Female	5	5	5	5	5	5	5	5	5	5	5	5	5	5	5	1	5	4	4	5	5	4	5	5	5	5	5	5	5	5	5	5	5	5	5	5	5	5	5	3	5	5	5	5	5
2020-03-30 17:21:50	Student	Chittagong University	Cumilla	Male	5	5	5	5	5	5	5	5	5	5	5	5	5	5	5	5	5	5	5	5	5	5	5	5	5	5	5	5	5	5	5	5	5	5	5	5	5	5	5	5	5	5	5	5	5
2020-03-30 17:21:55	Student	Bangladesh University of professionals	Uttara	Female	5	3	4	4	5	5	5	2	4	5	4	5	5	4	2	2	4	2	5	5	4	3	5	5	5	4	5	5	5	5	5	5	5	5	5	5	5	5	4	3	4	5	5	5	5
2020-03-30 17:23:50	Pharmacist	Currently not working	Mirpur-12	Female	5	5	5	5	5	5	4	5	4	5	5	5	5	5	5	2	3	2	2	4	5	4	5	4	4	5	5	5	4	5	5	4	3	5	5	5	5	5	5	5	4	5	4	5	5
2020-03-30 17:25:23	Private Service	TORAY INTERNATIONAL JAPAN	DHAKA	Male	4	4	4	4	5	5	5	5	2	4	5	5	5	1	5	3	4	4	3	5	5	4	5	5	5	4	5	4	4	5	3	5	1	5	5	5	5	4	3	3	3	2	2	5	5
2020-03-30 17:29:23	Student	Bangladesh Home Economic College, Dhaka	59/2, west razabaza, Dhaka	Female	5	5	5	5	5	4	5	5	5	5	5	5	5	5	5	1	1	1	1	5	5	5	4	5	5	5	5	5	4	5	5	5	5	5	5	5	5	5	5	5	5	5	5	5	5
2020-03-30 17:36:21	T	T	Times	Female	3	3	3	3	3	3	3	3	3	3	3	3	3	3	3	3	3	3	3	3	3	3	3	3	3	3	3	3	3	3	3	3	3	4	3	4	4	3	4	3	3	4	4	4	4
2020-03-30 17:36:59	Banker	Ibbl	Dhaka	Male	2	3	3	3	2	4	4	4	5	5	4	5	5	4	4	3	4	4	4	5	5	5	5	5	5	5	5	3	4	3	4	4	3	4	3	4	4	5	4	3	4	4	5	5	3
2020-03-30 17:36:48	Banker	Social Islami Bank Ltd	Dhaka	Male	4	4	4	4	5	5	5	5	5	5	5	4	5	4	5	4	4	4	4	5	5	4	5	4	3	4	4	5	4	5	3	4	3	5	5	5	5	5	5	5	5	5	4	4	4
2020-03-30 17:44:07	Teaching	Begum Rokeya University	Rangpur	Male	4	4	4	5	4	4	5	4	4	5	5	5	4	5	4	4	4	3	5	5	4	2	5	5	4	5	5	3	3	4	4	5	4	4	3	4	3	4	4	3	3	5	2	5	4
2020-03-30 17:44:50	1	National	parbatipur	Male	3	3	3	2	2	2	1	1	1	1	1	1	1	1	1	1	1	1	1	1	1	1	1	1	2	2	2	2	2	2	2	2	2	2	2	2	2	2	2	2	2	2	2	4	2
2020-03-30 17:44:58	1	National	parbatipur	Male	3	3	3	2	2	2	1	1	1	1	1	1	1	1	1	1	1	1	1	1	1	1	1	1	2	2	2	2	2	2	2	2	2	2	2	2	2	2	2	2	2	2	2	4	2
2020-03-30 17:45:03	Student	Sylhet AgriculturalUniversity	Sunamganj	Female	4	5	5	4	4	5	4	5	5	5	5	5	5	4	4	2	3	4	3	4	5	2	5	2	4	4	5	4	2	4	4	4	2	3	4	5	5	5	4	5	4	5	4	5	5
2020-03-30 17:48:30	Student	National university	Rajbari	Male	5	5	5	5	5	4	3	5	4	3	4	4	4	2	5	3	5	5	5	5	5	5	5	5	5	5	5	4	4	5	3	5	5	5	4	4	4	4	5	5	5	5	5	5	4
2020-03-30 17:51:22	Teaching	Jatiya Kabi Kazi Nazrul Islam University	Trishal, Mymensingh	Male	1	1	1	1	1	4	5	1	5	5	5	3	2	5	1	1	1	5	4	1	2	2	1	2	2	1	1	1	5	5	2	5	4	1	2	1	1	1	1	2	4	4	4	2	2
2020-03-30 17:51:55	Student	Jahangirnagar University	Dhaka	Male	5	4	4	5	4	5	5	5	4	4	4	4	5	5	5	2	4	2	4	4	5	3	5	4	4	5	5	5	2	3	4	5	5	4	5	5	5	5	5	5	5	5	4	4	4
2020-03-30 18:01:21	Student	Sher-e-Bangla Agricultural Universit, Dhaka - 1207	Dhaka	Male	4	2	3	3	4	2	4	3	3	3	3	4	3	3	4	4	4	4	4	4	4	4	5	4	4	5	4	4	4	4	4	3	4	3	3	3	3	4	4	3	3	4	3	4	4
2020-03-30 18:03:31	a	a	a	Female	1	1	1	1	1	1	1	1	1	1	1	1	1	1	1	1	1	1	1	1	1	1	1	1	1	1	1	1	1	1	1	1	1	1	1	1	1	1	1	1	1	1	1	1	1
2020-03-30 18:05:49	Student	Jahangirnagar University	Dhaka	Male	3	3	5	5	5	5	5	5	5	4	5	5	5	5	5	3	3	2	3	5	5	2	4	5	5	5	5	5	5	5	5	5	5	3	3	4	4	3	1	1	3	5	5	5	5
2020-03-30 18:06:43	Student	Begum Rokeya Universit, Rangpur.	Rangpur	Male	5	5	5	5	5	5	5	5	5	5	5	5	5	5	5	5	5	5	5	5	5	5	5	5	5	5	5	5	5	5	5	5	5	5	5	5	5	5	5	5	5	5	5	5	5
2020-03-30 18:06:54	Student	Sylhet Agricultural University	Bogura, Bangladesh	Male	5	5	5	5	5	5	5	5	5	5	5	5	5	5	5	1	5	3	2	5	5	5	5	5	5	5	5	5	5	5	5	3	5	5	5	5	5	5	3	2	2	5	5	5	5
2020-03-30 18:11:28	STUDENT	JU,Bangladesh	Savar	Female	5	4	4	4	4	4	4	5	5	4	4	4	5	5	4	2	2	1	4	4	5	4	4	4	4	5	5	5	5	5	5	4	4	5	5	4	5	5	4	4	4	5	5	4	4
2020-03-30 18:11:40	Teaching	International Islamic University Chittagong	Chittagong	Male	4	4	4	4	4	5	5	5	5	5	5	5	5	5	5	1	2	1	1	5	5	4	5	5	5	5	5	4	4	5	4	5	3	4	4	5	4	4	4	4	4	4	4	4	4
2020-03-30 18:15:30	Teaching	National University, Gazipur	Dhaka	Male	5	5	5	5	5	5	5	5	5	5	5	5	5	5	5	1	2	1	4	5	5	1	4	5	5	5	3	5	5	4	4	3	5	5	3	5	5	5	3	5	3	5	4	5	4
2020-03-30 18:19:52	Student	University of Dhaka	Pirojpur	Female	5	5	5	4	3	5	3	5	4	5	5	5	5	5	5	3	3	3	3	4	5	3	5	5	5	5	5	5	5	5	5	3	4	5	5	5	5	5	5	3	3	5	5	5	5
2020-03-30 18:20:13	Student	Begum Rokeya University, Rangpur	Rangpur	Male	5	4	5	5	4	3	4	5	5	4	5	3	2	4	4	2	4	2	3	5	5	4	5	4	5	5	4	4	4	4	4	4	4	5	4	4	4	4	4	5	2	4	4	4	4
2020-03-30 18:20:26	Student	Begum Rokeya University, Rangpur	Rangpur	Male	5	4	5	5	4	3	4	5	5	4	5	3	2	4	4	2	4	2	3	5	5	4	5	4	5	5	4	4	4	4	4	4	4	5	4	4	4	4	4	5	2	4	4	4	4
2020-03-30 18:21:52	Student	Begum Rokeya University, Rangpur	Rangpur	Female	5	3	5	5	5	5	4	5	3	5	5	5	5	5	5	3	3	2	3	5	5	5	5	4	5	5	5	5	5	5	5	3	4	4	5	5	5	4	5	4	4	5	5	5	4
2020-03-30 18:24:10	Teaching	Home	Gulshan,Dhaka	Female	5	5	5	5	5	5	5	5	5	5	5	5	5	5	5	4	4	4	4	5	5	3	5	4	4	4	4	4	4	3	4	4	3	4	4	3	5	5	4	2	3	4	3	4	4
2020-03-30 18:26:22	Student	Sylhet Agricultural University	Sylhet	Male	4	4	4	4	5	4	4	5	5	5	5	5	5	2	5	2	4	2	4	5	5	4	5	5	5	5	4	4	4	4	5	5	4	5	4	5	5	5	5	4	4	5	5	5	5
2020-03-30 18:26:36	Banker	Sonali Bank Limited	Keraniganj	Female	4	4	4	5	1	5	5	5	5	5	3	5	5	5	5	1	2	2	2	5	5	2	5	4	4	5	5	5	4	4	5	5	5	5	5	5	5	5	5	5	5	5	3	4	5
2020-03-30 18:28:55	student	Jahangirnagar University	Dhaka	Female	5	5	5	5	4	5	5	5	5	5	5	5	5	5	5	5	1	2	4	5	4	4	5	5	5	5	5	5	4	3	5	5	5	5	4	5	5	5	5	5	4	5	5	5	5
2020-03-30 18:29:32	Teaching	SUST	Sylhet	Male	5	3	3	5	5	5	5	5	5	5	5	5	5	5	5	4	3	3	4	4	5	3	5	4	4	3	3	3	3	4	3	2	3	5	4	5	4	3	5	3	3	3	3	3	3
2020-03-30 18:33:06	Student	Jashore University of Science & Technology	Jashore	Female	5	5	5	5	5	5	5	5	5	5	5	5	5	5	5	1	2	2	2	4	5	4	5	4	4	4	4	4	4	4	4	5	3	3	4	4	5	5	5	5	4	4	4	4	4
2020-03-30 18:36:36	Student	Jahangirnagar University	Dhaka	Female	5	4	4	5	5	4	5	5	5	5	4	5	4	4	5	3	3	3	3	5	5	4	4	5	5	5	4	5	4	4	5	4	3	5	4	5	5	5	5	4	3	5	4	5	4
2020-03-30 18:38:35	Service	BRAC	Patuakhali Sadar	Male	5	5	5	5	5	4	5	5	5	5	5	5	5	5	5	1	2	1	1	5	4	4	4	5	5	5	5	5	5	5	5	5	5	5	5	5	5	5	4	4	4	5	4	5	4
2020-03-30 18:39:02	Service	BRAC	Patuakhali Sadar	Male	5	5	5	5	5	4	5	5	5	5	5	5	5	5	5	1	2	1	1	5	4	4	4	5	5	5	5	5	5	5	5	5	5	5	5	5	5	5	4	4	4	5	4	5	4
2020-03-30 18:43:07	Student	Jahangirnagar University	Savar	Female	5	3	5	5	5	5	5	5	5	5	5	5	5	5	5	3	2	2	4	4	5	3	5	5	5	5	5	5	5	5	5	5	3	3	5	5	5	5	5	5	4	5	4	5	5
2020-03-30 18:45:27	student	Jahangirnagar University	Khilkhet, Dhaka-1229	Female	4	4	4	4	5	5	4	4	5	5	5	5	5	4	5	3	2	2	2	5	5	4	4	5	4	5	5	4	4	4	4	3	4	5	4	5	5	5	4	5	5	5	5	5	5
2020-03-30 18:45:40	Lecturer	DUET	Gazipur	Male	5	5	5	4	5	4	1	3	5	5	3	5	5	4	5	2	3	1	3	4	4	3	3	5	5	5	3	3	3	4	4	4	4	4	3	5	5	5	4	5	4	5	5	5	5
2020-03-30 18:48:03	retired teacher	Govt. School	Naogaon	Male	5	3	5	5	5	5	5	5	5	5	5	5	5	5	5	2	2	2	2	5	5	5	5	5	5	5	5	5	5	4	5	5	5	5	5	5	5	5	5	5	5	5	5	5	5
2020-03-30 18:47:19	Student	Jessore University of Science and Technology	Khulna	Female	5	4	4	5	2	5	5	5	4	4	5	5	5	5	5	2	2	2	3	4	4	4	4	4	4	5	5	4	4	4	5	4	4	4	4	4	4	5	4	3	3	5	5	5	4
2020-03-30 18:51:20	Student	Sylhet Agricultural University	Sylhet	Female	5	5	5	5	5	4	5	5	3	5	4	4	5	5	5	3	2	1	3	5	5	3	5	3	3	5	5	5	5	5	5	5	4	5	5	5	5	5	4	5	3	5	5	5	5
2020-03-30 18:56:42	Student	Jagannath university	Kazipara.mirpur.dhaka	Female	3	3	4	4	3	3	4	5	5	5	5	5	5	2	5	3	2	1	2	5	5	5	5	5	4	5	5	5	5	5	5	5	3	5	5	5	5	5	5	5	5	5	5	5	5
2020-03-30 18:52:47	ছাত্র	জাহাঙ্গীরনগর বিশ্ববিদ্যালয়	দিনাজপুর,সদর	Male	4	5	2	5	5	5	5	5	4	5	5	5	5	5	5	1	1	1	5	5	5	2	4	5	5	5	5	4	4	5	5	5	4	4	5	5	5	5	4	1	2	5	5	5	5
2020-03-30 18:57:56	Teaching	Educational institution	Rajshahi	Female	5	5	5	5	5	5	5	5	5	5	5	5	5	5	5	4	3	3	1	5	5	5	5	5	5	5	5	5	5	3	5	5	5	5	5	5	5	5	5	5	5	5	4	5	5
2020-03-30 19:10:38	Student	Khulna University	Nilphamari	Male	5	3	5	5	5	5	5	5	5	5	5	5	5	5	5	1	1	1	2	4	5	4	5	4	4	5	5	4	5	5	5	5	5	5	5	5	5	5	5	5	4	5	5	5	5
2020-03-30 18:58:19	Teaching	Educational institution	Rajshahi	Female	5	5	5	5	5	5	5	5	5	5	5	5	5	5	5	4	3	3	1	5	5	5	5	5	5	5	5	5	5	3	5	5	5	5	5	5	5	5	5	5	5	5	4	5	5
2020-03-30 19:06:29	Student	Bangladesh Universityof professionals	Mirpur Cantonment	Female	5	5	5	5	5	5	5	5	4	5	5	5	5	4	5	3	3	3	4	5	5	4	5	4	4	5	5	5	4	4	4	4	4	5	3	5	5	5	5	4	5	5	5	5	5
2020-03-30 19:07:37	Teaching and Research	Patuakhali Science and Technology University	Dumki, Bangladesh	Male	5	3	3	2	4	2	3	5	4	5	4	4	5	2	3	3	3	3	3	3	4	3	5	5	5	5	5	4	3	3	4	5	3	4	4	5	5	4	3	3	4	5	4	3	4
2020-03-30 19:13:22	Student	Jahangirnagar university	Savar	Male	4	4	4	4	4	3	4	4	4	4	4	4	4	3	4	4	4	4	5	4	4	4	4	4	4	4	4	4	4	4	4	4	4	4	4	4	4	4	4	4	4	4	3	4	4
2020-03-30 19:17:27	Student	NSU	Bashundhara R/A	Female	4	3	3	4	4	5	5	5	3	5	5	5	5	4	5	2	1	2	2	4	5	2	5	5	5	5	5	5	5	5	5	5	5	5	5	5	5	5	5	5	3	4	4	5	5
2020-03-30 19:15:26	Student	Jahangirnagar University	Savar	Female	5	5	5	5	5	5	5	5	3	5	5	5	5	2	5	5	1	2	2	5	5	4	5	5	5	5	4	3	4	4	5	4	3	5	4	5	5	5	5	5	3	5	5	5	3
2020-03-30 19:15:59	Job Holder	Ananta Companies Ltd.	DEPZ Road,Nishchintapur, Zirabo,Ashulia,Dhaka	Male	3	3	4	4	4	5	5	5	4	5	3	4	5	3	4	1	2	1	1	2	5	4	5	5	5	5	4	5	5	5	5	5	4	3	4	5	5	5	5	5	3	5	5	5	5
2020-03-30 19:16:28	Job Holder	Youngone	Dhaka Epz,dhaka	Female	5	3	5	5	5	5	5	5	5	5	5	5	5	5	5	1	2	1	1	5	5	5	5	5	5	5	5	5	5	5	5	5	5	4	5	5	5	5	5	5	5	5	5	5	5
2020-03-30 19:18:36	Banker	Islami bank	Singair, manikganj	Male	5	5	5	5	5	5	5	5	5	5	5	5	5	5	5	1	1	1	3	5	5	3	5	5	5	5	5	5	5	5	5	5	3	5	5	5	5	5	3	5	2	5	4	5	5
2020-03-30 19:18:29	Student	Jahangirnagar University	Munshigonj	Male	4	4	2	4	5	5	4	5	4	5	5	5	5	2	5	2	2	3	3	5	5	3	5	4	4	5	4	3	2	4	5	5	1	4	2	4	5	5	5	4	4	5	2	1	1
2020-03-30 19:18:15	Student	Jahangirnagar University	Dhaka	Male	5	5	5	5	5	5	5	5	5	5	5	5	5	5	5	5	5	5	5	5	5	5	5	5	5	5	5	5	5	5	5	5	5	5	5	5	5	5	5	5	5	5	5	4	4
2020-03-30 19:18:23	Business	Jewellery	Mongla Sea Port, Mongl, Bagerhat	Male	5	5	5	5	5	5	5	1	5	5	5	5	5	5	5	1	1	1	1	5	5	5	5	5	5	5	5	5	1	5	5	5	5	5	5	5	5	5	5	5	5	5	5	5	5
2020-03-30 19:21:25	Independent consultant	Self employed	Dhaka	Female	5	4	5	4	5	5	5	5	3	5	5	5	5	5	5	4	3	2	1	5	5	3	5	5	5	5	5	5	5	5	5	4	4	5	4	5	5	5	4	4	3	5	5	5	5
2020-03-30 19:21:44	Civil Engineer	Abdul Monem Ltd.	Dhaka	Male	5	4	4	5	5	5	5	4	4	5	5	5	5	4	5	2	3	1	3	5	5	4	5	5	5	5	3	4	5	5	5	4	4	5	4	5	5	5	5	4	5	5	4	4	5
2020-03-30 19:21:45	Student	Jashore University of Science and Technology	Jashore district	Female	4	4	4	4	4	4	5	5	5	5	5	4	5	5	5	2	4	2	4	5	5	3	4	5	5	5	5	4	5	5	5	5	3	4	5	5	5	5	5	4	5	5	5	5	5
2020-03-30 19:33:10	Student	Sher-e-bangla Agricultural University	Homna,Cumilla	Male	5	5	5	1	5	1	3	3	3	3	3	3	3	3	3	1	1	1	3	3	3	3	5	5	5	5	5	5	5	3	5	5	5	5	5	5	3	3	3	3	3	3	3	4	3
2020-03-30 19:31:01	Student	JahangirnagarUniversity	Dhaka	Female	5	5	5	3	4	5	5	4	5	5	5	5	5	5	5	3	2	1	2	5	5	5	5	5	5	5	5	5	5	5	5	5	5	5	4	5	5	5	5	5	3	5	5	5	5
2020-03-30 19:47:31	Service	ABM WATER COMPANY	Dhaka	Male	4	3	2	4	5	3	5	5	5	3	3	4	3	4	4	3	4	3	3	4	4	3	5	5	5	5	5	5	3	3	5	4	3	3	3	3	3	3	3	3	3	3	3	4	3
2020-03-30 19:38:08	Student	Sylhet Agricultural University	Sylhet	Male	4	3	3	4	4	4	5	4	5	5	5	5	5	3	4	2	3	2	3	5	5	1	5	4	4	3	4	3	3	4	2	3	4	4	4	4	4	4	4	3	3	3	3	3	3
2020-03-30 19:39:51	Student	Hokkaido University	Japan	Female	4	3	3	3	3	4	5	5	5	5	5	5	5	5	5	4	3	3	3	5	5	3	3	5	5	3	3	4	4	5	5	4	4	4	5	5	4	4	3	3	3	5	5	5	5
2020-03-30 19:41:47	Government Service	New Govt Degree College, Rajshahi	Rajshahi	Male	4	3	3	4	5	5	4	5	5	5	4	5	5	4	5	2	2	1	3	4	5	3	4	5	5	4	4	4	4	5	4	5	5	4	3	5	4	4	4	4	3	4	2	4	4
2020-03-30 19:42:28	Student	University of Dhaka	House-327, Road-8/A West Dhanmondi Dhaka-1209	Female	5	2	3	4	2	5	4	5	4	4	4	5	5	2	5	4	3	2	3	5	4	3	5	4	4	5	5	5	5	5	5	3	2	4	5	5	5	4	3	2	4	5	4	3	4
2020-03-30 19:44:16	Student	Icmab	Dhaka	Male	5	3	3	5	4	4	5	5	2	4	5	5	5	5	5	3	5	2	4	5	5	5	5	5	5	5	5	4	5	5	5	5	5	5	3	5	5	5	5	5	4	4	5	5	5
2020-03-30 19:44:53	Merchandiser	Ananta Companies Ltd	Ashulia	Female	4	5	5	5	5	5	4	5	5	5	4	5	5	2	5	2	1	1	1	5	5	3	5	2	5	5	5	3	2	3	5	3	4	5	5	5	5	5	4	5	4	5	5	5	5
2020-03-30 19:46:53	Private service	ICCCAD	Dhaka	Male	5	4	5	3	5	5	4	5	5	4	5	5	5	5	5	3	2	2	3	5	5	5	5	5	5	5	5	5	5	5	5	4	5	5	5	5	5	5	5	4	4	5	2	5	4
2020-03-30 19:47:05	Student	Jahangirnagar University	Cumilla	Female	4	4	4	4	4	5	5	4	4	4	4	4	5	5	4	2	1	1	3	4	4	3	5	4	4	5	4	4	5	5	5	4	3	3	5	5	5	4	4	4	4	5	4	4	4
2020-03-30 19:50:21	Student	Gono Bishwabidyalay	Savar	Male	2	5	5	5	5	2	5	5	1	4	5	3	5	4	5	5	4	4	4	5	5	3	5	5	5	5	5	5	5	5	5	5	4	1	5	4	4	5	4	5	5	4	4	4	4
2020-03-30 19:50:14	Student	Begum Rokeya Universit, Rangpur	Pirganj,Rangpur	Male	4	5	4	3	4	5	2	5	5	5	5	4	5	5	4	2	1	3	3	4	5	3	4	4	4	5	5	4	4	3	5	4	4	3	4	5	4	4	3	4	4	5	4	5	4
2020-03-30 19:49:08	student	begum rokeya university Rangpur	rangpur	Female	5	4	5	3	3	4	5	5	3	5	5	5	5	5	5	4	3	1	3	5	5	4	5	3	3	5	5	5	4	5	4	5	5	5	5	5	5	5	4	5	3	5	4	4	4
2020-03-30 19:50:14	Student	Gono Bishwabidyalay	Savar	Male	2	5	5	5	5	2	5	5	1	4	5	3	5	4	5	5	4	4	4	5	5	3	5	5	5	5	5	5	5	5	5	5	4	1	5	4	4	5	4	5	5	4	4	4	4
2020-03-30 19:50:18	Student	Gono Bishwabidyalay	Savar	Male	2	5	5	5	5	2	5	5	1	4	5	3	5	4	5	5	4	4	4	5	5	3	5	5	5	5	5	5	5	5	5	5	4	1	5	4	4	5	4	5	5	4	4	4	4
2020-03-30 19:50:28	Student	Begum Rokeya Universit, Rangpur	Pirganj,Rangpur	Male	4	5	4	3	4	5	2	5	5	5	5	4	5	5	4	2	1	3	3	4	5	3	4	4	4	5	5	4	4	3	5	4	4	3	4	5	4	4	3	4	4	5	4	5	4
2020-03-30 19:53:17	Student	Sylhet Agricultural University	Sylhet-3100	Male	5	2	3	5	4	5	5	4	5	5	5	5	5	3	5	4	4	3	4	4	5	4	5	5	4	5	5	3	2	4	4	2	3	3	3	3	4	4	5	3	3	3	2	4	4
2020-03-30 19:51:42	Job Holder	Terre des hommes	Teknaf	Male	5	2	4	4	2	5	4	5	4	5	3	5	5	3	5	1	2	2	3	5	5	3	5	5	5	5	5	4	4	4	5	5	3	5	4	5	5	5	5	4	3	5	4	5	5
2020-03-30 19:55:59	Teaching	Banani Bidyaniketan School and College	Banani	Female	5	5	5	4	5	5	5	3	1	5	5	5	5	3	4	4	5	5	5	5	5	3	5	5	5	5	3	4	2	3	4	5	3	4	4	5	5	5	5	2	4	5	4	4	3
2020-03-30 19:54:16	student	Jahangirnagar University	Savar, Dhaka	Female	4	4	5	4	5	4	4	4	4	4	4	4	5	5	4	2	2	2	3	5	5	4	5	4	4	5	3	4	4	5	5	5	4	4	2	4	4	4	4	4	3	5	4	4	4
2020-03-30 19:58:50	Doctor	Child Health Research Foundation	Dhaka	Female	4	5	4	4	5	4	5	4	1	4	4	5	4	5	5	2	1	2	3	5	5	4	5	5	5	5	5	5	5	5	5	5	5	5	5	5	5	5	4	4	3	5	4	4	4
2020-03-30 19:58:42	Student	Jashore University of Science and Technology	Khulna	Female	5	4	5	5	5	5	5	5	5	5	5	5	5	2	5	5	4	5	4	5	5	5	5	5	5	5	5	5	5	3	5	5	4	5	5	5	5	5	5	5	5	5	5	5	5
2020-03-30 19:59:54	Officer, hr& compliance	Hameem group	Ashulia	Male	5	5	5	5	5	5	5	5	5	5	5	5	5	1	5	5	5	2	3	5	5	5	5	5	5	5	5	5	5	5	5	5	5	5	4	5	5	5	5	5	5	5	5	5	5
2020-03-30 20:00:24	Banker	Jbl	Pabna	Male	5	5	5	5	5	1	5	5	5	5	5	5	5	5	5	1	1	5	1	5	5	5	5	5	5	5	5	5	5	5	5	5	5	5	5	5	5	5	5	5	2	5	5	5	5
2020-03-30 20:00:15	Student	Jahangirnagar University	Savar, Dhaka, Bangladesh	Female	5	5	5	5	1	5	5	5	5	5	5	5	3	3	3	1	2	3	3	3	3	3	5	3	3	5	3	3	4	3	4	3	3	3	3	3	3	3	3	3	3	3	3	4	5
2020-03-30 20:02:15	Student	Jahangirnagar University	Dhaka	Female	5	3	5	5	5	5	5	5	5	5	5	5	5	5	5	1	1	3	3	5	5	5	3	4	4	5	4	4	4	4	5	5	3	3	4	3	5	5	4	5	5	5	5	5	5
2020-03-30 20:01:49	Student	Jahangirnagar University	Savar,Dhaka	Female	4	4	5	5	4	5	5	5	5	5	5	5	5	5	5	2	2	2	3	5	5	4	5	5	5	5	5	5	5	5	5	5	5	5	4	5	5	5	5	3	4	5	5	5	5
2020-03-30 20:03:47	Student	Jahangirnagar university	Kushtia	Male	3	3	2	3	4	3	2	3	3	3	3	3	3	3	3	3	1	1	3	1	5	3	3	3	3	5	3	5	5	5	5	5	3	4	4	3	4	4	3	4	3	5	4	4	4
2020-03-30 20:07:27	Student	Ju	Mohammadpur	Female	5	5	5	5	5	4	4	5	4	4	4	4	5	4	4	3	3	2	3	4	4	3	4	4	4	4	4	4	4	4	4	4	4	4	4	4	4	4	4	4	4	4	4	4	4
2020-03-30 20:07:52	Apprentice Lawyer	Department of Law and Justice	Dhaka	Male	2	3	2	2	5	5	4	5	3	5	4	5	4	3	5	2	4	3	3	5	5	2	4	5	5	5	3	4	3	5	5	4	2	4	2	4	4	4	3	3	3	5	3	5	5
2020-03-30 20:08:26	Govt. Service	Bangladesh Economic Zones Authority	Karwan Bazar, Dhaka	Male	5	4	4	4	4	5	5	5	5	5	5	5	5	4	5	3	4	3	3	4	5	4	5	5	5	5	5	5	4	4	5	4	4	5	4	5	5	4	4	4	3	5	4	5	4
2020-03-30 20:10:37	student	Begum Rokeya University , Rangpur	Rangpur	Male	5	5	5	5	5	5	5	5	5	5	5	5	5	5	5	5	5	1	1	5	5	5	5	5	5	5	5	5	5	5	5	5	5	5	4	5	5	5	5	5	5	5	5	5	5
2020-03-30 20:15:34	Private Service	Airasia	Dhaka	Male	5	5	5	5	4	5	5	5	5	5	5	5	5	4	5	2	2	1	2	4	5	4	5	5	5	5	5	5	5	3	4	5	4	5	5	5	5	5	4	3	4	5	5	5	4
2020-03-30 20:12:31	Student	Jahangirnagar University	Savar	Male	4	3	4	3	5	5	5	5	5	5	5	5	5	4	5	4	3	1	4	5	5	4	5	5	5	5	4	4	4	5	5	5	4	5	5	5	5	4	4	3	3	5	4	5	5
2020-03-30 20:21:15	Government Service	Bangladesh Army	Dhaka	Male	3	3	3	4	5	4	5	4	5	5	5	5	5	5	2	2	5	3	5	5	5	4	5	5	5	5	4	5	2	4	5	5	2	5	4	5	5	5	3	2	4	5	4	4	4
2020-03-30 20:16:56	Job holder	PKSF	Dhaka	Female	5	5	5	5	5	5	5	4	4	5	5	5	5	5	5	1	1	2	2	4	3	3	5	5	5	5	4	4	4	4	4	4	4	5	5	5	5	5	4	5	3	5	4	4	4
2020-03-30 20:19:31	Service	Green university of Bangladesh	Dhaka	Male	5	4	4	5	4	4	4	5	5	5	5	4	5	4	4	3	4	4	4	5	5	4	5	5	5	5	5	5	4	5	5	5	4	5	5	4	5	4	4	4	5	5	4	5	5
2020-03-30 20:20:05	Student	Jahangirnagar University	Savar	Male	4	4	4	5	5	5	5	5	5	5	5	5	5	5	5	1	2	2	2	4	5	4	4	5	5	5	5	4	4	4	4	4	4	4	4	4	5	4	4	5	4	4	4	5	5
2020-03-30 20:23:19	Teaching	BSMRSTU	Gopalganj	Female	4	4	4	4	3	3	5	5	3	3	3	5	5	3	3	3	3	2	3	5	5	4	5	5	5	5	5	5	4	4	5	4	4	4	5	4	4	5	4	4	4	5	4	4	4
2020-03-30 20:23:38	Sales Executive	Square Pharmaceuticals Ltd, Bangladesh	Barisal	Male	5	4	5	5	4	1	5	5	5	5	5	5	5	4	5	1	1	2	3	4	5	3	5	4	4	5	5	4	4	5	5	4	4	5	5	5	5	5	4	4	4	5	4	4	4
2020-03-30 20:28:26	student	LCBS,Dhaka	Dhanmondi,Dhaka	Female	5	5	5	5	5	4	5	5	5	5	5	4	5	5	5	3	3	3	3	4	4	3	4	5	5	5	4	5	5	4	5	5	4	3	4	4	5	5	4	3	5	5	5	5	5
2020-03-30 20:42:52	Student	Jahangirnagar University	Dhaka	Male	1	1	1	5	3	1	5	5	3	3	5	5	5	5	5	1	3	1	3	5	5	1	1	5	5	5	5	5	5	5	5	5	5	5	3	4	5	1	5	5	5	5	5	5	5
2020-03-30 20:41:11	student	jahangirnagar university	savar,Dhaka	Male	3	2	5	4	4	3	5	5	5	5	4	5	5	3	5	2	2	1	1	4	5	2	5	5	5	5	5	4	2	4	5	5	3	4	4	5	4	4	3	5	2	5	5	5	3
2020-03-30 20:59:09	Student	Jahangirnagar University	Maniknagar,Mugda,Dhaka-1203	Male	5	5	5	5	5	5	3	3	5	5	5	5	5	4	5	3	3	2	3	4	5	4	4	4	4	5	3	3	5	4	5	4	4	4	4	5	5	5	4	4	4	5	5	5	5
2020-03-30 20:45:54	Student	Daffodil International University	Dhaka	Male	4	4	5	4	5	4	5	5	4	5	5	3	5	2	4	1	1	1	2	4	4	3	4	4	4	4	3	4	4	2	4	2	2	2	4	5	5	5	4	4	3	5	4	4	4
2020-03-30 20:53:19	Service Holder	1000fix Services Limited	Dhaka	Male	5	5	3	5	4	1	4	5	3	4	4	3	5	5	5	3	2	4	3	5	4	3	5	4	4	5	4	5	4	5	5	3	1	4	3	4	4	4	5	3	3	5	5	4	3
2020-03-30 21:01:35	Army Officer	Bangladesh Army	Gazipur	Female	3	3	4	2	4	4	5	3	3	4	4	5	4	5	4	2	4	2	4	5	5	3	5	5	5	5	5	5	5	5	5	4	4	4	3	5	4	4	5	3	3	5	5	4	4
2020-03-30 21:00:17	student	sylhet agricultural university	sylhet	Female	5	5	5	5	5	5	5	5	5	5	5	5	5	5	5	3	5	4	5	5	5	5	5	5	5	5	5	5	5	5	5	5	5	5	5	5	5	5	5	2	3	5	5	5	5
2020-03-30 21:05:41	Student	Dhaka University	Kurigram, Bangladesh	Male	5	5	5	5	5	1	1	5	5	5	5	5	5	5	5	1	1	1	1	5	5	5	5	2	2	5	4	4	2	4	5	1	1	5	5	5	5	5	5	5	1	5	1	1	4
2020-03-30 21:02:48	Student	Bangabandhu Sheikh Mujibur Rahman Science and Technology,University	Gopalganj	Male	5	5	5	5	5	5	5	5	5	5	5	5	5	5	5	2	1	1	5	5	5	3	5	5	5	5	5	5	5	5	5	5	5	5	5	5	5	5	5	3	3	5	3	5	5
2020-03-30 21:02:52	Trainee	BKMEA, Dhaka	Ati Bazar-1312, Keraniganj, Dhaka	Male	4	4	4	4	4	5	4	4	4	4	4	5	5	3	5	3	2	1	3	5	5	4	5	5	5	5	4	5	4	4	4	5	5	5	4	5	5	5	4	4	4	5	4	4	5
2020-03-30 21:04:42	Student	European University of Bangladesh	Dhaka	Male	5	5	5	5	5	5	5	5	5	5	5	5	5	5	5	5	5	5	5	5	5	5	5	5	5	5	5	5	5	5	5	5	5	5	5	5	5	5	5	5	5	5	5	5	5
2020-03-30 21:10:40	Student	Jahangirnagar University	Dhaka	Male	2	2	2	4	4	3	3	5	4	2	1	1	2	2	1	2	2	2	3	5	5	1	2	5	5	5	5	4	5	5	4	5	5	4	3	5	4	5	5	4	4	5	4	4	4
2020-03-30 21:10:09	Student	BSMRSTU	Gopalgonj	Male	2	1	3	1	4	3	5	5	5	5	5	5	5	3	5	3	4	3	4	5	5	3	5	4	5	2	5	5	4	4	5	4	2	4	4	3	4	5	5	5	4	5	5	5	5
2020-03-30 21:11:01	Student	Jahangirnagar University, Savar, Dhaka.	Dhanmondi	Male	4	5	5	3	2	5	5	4	5	5	5	5	5	5	5	1	2	1	1	3	5	4	5	2	2	3	2	1	5	5	2	3	4	5	5	5	5	5	4	5	3	3	3	3	1
2020-03-30 21:14:25	Student	University of Waterloo	Canada	Female	5	4	5	5	5	5	5	5	4	5	5	5	5	5	5	2	1	1	2	5	5	4	5	5	5	5	5	5	5	5	5	5	5	5	5	5	5	5	5	5	5	5	5	5	5
2020-03-30 21:13:37	Student	Alumni of Jahangirnagar University	Dinajpur (Current Location)	Male	5	5	5	4	4	5	4	2	5	5	5	5	5	3	5	2	2	2	3	4	5	3	4	5	4	5	5	3	2	3	5	4	4	5	5	5	5	5	5	5	5	5	5	4	5
2020-03-30 21:14:14	Teaching	Noakhali Science and Technology University	Noakhali	Male	4	4	5	5	5	5	4	5	5	5	5	5	5	5	5	1	1	1	2	5	5	4	4	5	5	5	4	5	4	5	5	5	5	5	4	5	5	5	5	5	5	5	4	5	4
2020-03-30 21:21:56	Private Service	Moanoghar	Rangamati	Male	3	3	3	4	5	5	5	5	4	4	5	5	5	4	5	2	3	1	3	5	5	3	5	4	4	5	4	5	4	4	4	4	3	3	3	5	5	4	5	4	3	5	4	4	4
2020-03-30 21:19:27	Student	Bangabandhu Sheikh Mujibur Rahman Science and Technology University	Khulna	Female	5	5	5	5	2	5	5	5	4	5	5	4	5	5	5	2	2	4	2	5	5	4	5	5	5	5	5	5	5	5	5	5	4	5	5	5	5	5	5	4	2	5	5	5	5
2020-03-30 21:19:47	Student	Begum Rokeya University	Rangpur	Male	5	3	5	5	5	5	5	5	3	5	5	4	5	3	5	5	1	1	1	5	5	4	4	4	4	5	5	5	4	4	5	4	5	5	5	5	5	5	5	5	3	5	5	5	5
2020-03-30 21:22:07	Student	Jahangirnagar University	Dhaka	Male	5	5	5	3	3	5	5	5	5	5	5	5	5	5	5	2	1	1	4	5	5	3	5	4	4	5	3	5	4	4	5	5	4	5	5	5	5	5	5	5	4	5	4	4	4
2020-03-30 21:22:04	student	BSMRSTU	Gopalganj	Female	4	3	4	3	3	2	5	5	5	5	5	5	4	5	5	1	3	3	2	5	4	2	5	5	5	5	5	3	3	4	5	5	3	5	3	5	5	5	3	2	3	5	3	4	4
2020-03-30 21:22:13	Student	Bangabandhu Sheikh Mujibur Rahman Science & Technology University	Khulna Sadar	Male	5	5	5	4	5	5	5	4	5	5	5	5	5	2	5	2	4	4	3	5	3	3	5	5	5	5	5	5	5	5	5	5	4	5	3	4	5	5	4	2	3	5	5	5	5
2020-03-30 21:22:20	Student	Bangabandhu Sheikh Mujibur Rahman Science & Technology University	Khulna Sadar	Male	5	5	5	4	5	5	5	4	5	5	5	5	5	2	5	2	4	4	3	5	3	3	5	5	5	5	5	5	5	5	5	5	4	5	3	4	5	5	4	2	3	5	5	5	5
2020-03-30 21:25:46	Student	Jahangirnagar University	Chittagong	Female	4	4	4	5	5	4	5	5	5	5	5	5	5	5	5	5	2	2	3	5	5	4	4	3	3	5	3	4	3	3	5	4	4	5	5	3	5	3	3	3	4	5	3	3	3
2020-03-30 21:24:53	Student	Bangabandhu Sheikh Mujibur Rahman Science And Technology University Gopalgonj-8100	Muksudpu, Gopalgonj	Male	4	3	4	4	5	5	5	4	5	5	5	5	5	5	5	3	4	4	4	5	5	2	5	5	5	5	5	2	4	4	5	5	5	5	3	4	4	5	4	4	3	5	5	5	4
2020-03-30 21:26:49	Service Holder	MNC	DEPZ	Male	4	4	5	5	4	5	5	5	5	5	5	5	5	3	4	5	2	1	2	4	3	3	3	5	4	5	5	4	4	5	3	4	4	3	3	5	5	5	5	5	5	5	5	5	5
2020-03-30 21:40:05	Student	Bsmrstu	Gopalgonj	Male	5	4	5	4	4	5	5	4	5	4	5	4	4	4	4	5	4	5	4	4	3	3	4	4	3	3	4	3	3	3	3	5	4	5	4	4	4	5	4	3	5	4	4	5	4
2020-03-30 21:28:32	student	University Of south Asia	Banani	Male	4	3	4	2	4	3	3	4	2	4	4	4	4	4	4	3	4	4	4	5	5	4	4	4	4	4	4	3	2	2	4	5	3	3	3	5	3	4	4	2	3	4	3	4	2
2020-03-30 21:32:00	Service	Room to Read	Agargaon	Female	5	4	5	5	5	5	4	4	3	5	1	5	5	4	5	4	1	1	1	3	5	1	5	4	4	5	4	4	5	5	5	5	4	5	5	5	5	5	5	5	4	5	5	4	5
2020-03-30 21:40:13	Student	Bsmrstu	Gopalgonj	Male	5	4	5	4	4	5	5	4	5	4	5	4	4	4	4	5	4	5	4	4	3	3	4	4	3	3	4	3	3	3	3	5	4	5	4	4	4	5	4	3	5	4	4	5	4
2020-03-30 21:40:20	Student	Bsmrstu	Gopalgonj	Male	5	4	5	4	4	5	5	4	5	4	5	4	4	4	4	5	4	5	4	4	3	3	4	4	3	3	4	3	3	3	3	5	4	5	4	4	4	5	4	3	5	4	4	5	4
2020-03-30 21:41:07	student	Sylhet Agricultural University	Sylhet	Female	5	5	5	4	4	5	5	5	5	4	5	5	3	4	5	1	2	2	2	4	5	3	5	5	5	4	5	4	5	5	5	5	4	5	5	5	5	5	4	3	4	5	5	5	5
2020-03-30 21:42:57	Researcher	Bangladesh Atomic Energy Commission	Dhaka	Female	5	5	3	4	2	4	4	3	5	5	5	4	5	5	5	3	4	2	3	5	5	5	5	5	5	5	3	5	5	3	5	5	5	5	5	5	5	5	5	3	4	5	4	5	5
2020-03-30 21:45:36	Researcher	icddr,b	Dhaka	Male	5	5	5	5	5	5	5	4	5	5	5	5	5	5	5	1	1	1	1	5	5	2	5	4	4	5	3	3	2	1	4	3	1	5	5	5	5	5	4	3	4	5	5	5	5
2020-03-30 21:50:33	Teacher	Jahangirnagar University	Dhaka	Female	5	5	5	5	5	5	5	5	5	5	5	5	5	5	5	1	1	1	5	5	5	5	5	5	5	5	5	5	5	5	5	5	5	5	5	5	5	5	5	5	5	5	5	5	5
2020-03-30 21:53:14	Student	Bangabandhu Sheikh Mujibur Rahman Science and Technology University; Gopalganj-8100.	Faridpur.	Male	3	3	4	3	5	5	5	4	2	5	5	5	5	5	5	1	1	1	4	5	5	4	4	4	4	5	4	5	5	5	5	4	5	4	4	5	5	5	4	5	4	5	5	5	5
2020-03-30 21:55:16	DevelopmentProfessional	BRAC	Cox'sBazar	Male	4	5	5	5	5	5	5	5	5	5	5	5	5	5	5	1	1	1	1	5	5	2	5	4	5	5	5	5	5	5	5	5	5	5	4	5	5	5	5	3	4	5	5	5	5
2020-03-30 22:08:42	Student	Sylhet Agricultural University	Bijoynaga, Brahmanbaria	Male	4	2	2	4	5	4	4	5	4	4	4	4	5	4	5	4	5	4	3	5	5	3	5	4	4	5	1	2	2	2	4	5	2	5	5	4	4	5	5	2	2	4	4	4	2
2020-03-30 22:14:15	Student	Jahangirnagar University	Savar, Dhaka	Female	4	4	5	2	4	1	2	4	4	5	5	5	5	5	5	1	1	1	2	4	4	3	3	5	5	5	5	4	4	5	5	5	5	4	5	4	5	5	4	3	4	5	4	5	5
2020-03-30 22:26:43	Student	Jahangirnagar University	Brahmanbaria, chittagong, Bangladesh	Male	2	4	4	5	5	5	4	5	1	5	5	5	5	4	5	1	1	1	5	5	5	3	3	5	5	5	5	5	3	5	5	5	4	5	4	5	5	5	4	4	3	5	4	4	4
2020-03-30 22:31:16	Housewife	Home	Borlänge, Sweden	Female	2	1	2	4	4	5	5	4	4	5	5	5	5	5	5	1	2	3	2	5	5	5	5	5	5	5	4	5	5	4	5	5	4	4	2	5	5	3	5	2	3	5	4	5	5
[truncated: 2 more columns]

## Sheet: Regresssion results
	Model		Unstandardized Coefficients		Standardized Coefficients	t	Sig.	95.0% Confidence Interval for B
			B	Std. Error	Beta			Lower Bound	Upper Bound
	MH1	(Constant)	0.297	0.281		1.055	0.291	-0.255	0.849
	MH2	I am afraid of getting coronavirus	0.314	0.03	0.335	10.357	0	0.255	0.374
	MH3	I am afraid of losing my life or my relatives' life due to this outbreak	0.14	0.03	0.151	4.736	0	0.082	0.198
	MH4	All the news and numbers of COVID-19 in different media increasing my tension	0.181	0.026	0.188	6.984	0	0.13	0.232
	HSB1	Health system of Bangladesh is fragile to deal with the recent outbreak of COVID-19	0.053	0.026	0.053	2.02	0.044	0.002	0.105
	HSB8	There is a lack of COVID-19 testing facility in Bangladesh	0.087	0.046	0.061	1.897	0.058	-0.003	0.177
	GPI7	The developed nations are going to support Bangladesh in response to COVID-19	0.049	0.025	0.049	1.956	0.051	0	0.098
	SEI10	The formal education system will be hampered	-0.075	0.032	-0.065	-2.341	0.019	-0.139	-0.012
	IEI1	There is a chance of community transmission of COVID-19 in Bangladesh	0.104	0.036	0.084	2.889	0.004	0.033	0.175
	IEI2	A huge number of people will be infected	0.117	0.033	0.107	3.504	0	0.052	0.183
	HSB1	Health system of Bangladesh is fragile to deal with the recent outbreak of COVID-19	0.514	0.334		1.539	0.124	-0.141	1.169
	MH1	I am most afraid of coronavirus recent outbreak in Bangladesh	0.075	0.037	0.075	2.02	0.044	0.002	0.148
	HSB2	A huge population is a pressure to the existing health system to deal with COVID-19	0.125	0.036	0.108	3.441	0.001	0.054	0.196
	HSB5	There is a lack of health facilities to combat the COVID-19 outbreak in Bangladesh	0.296	0.058	0.215	5.094	0	0.182	0.41
	GPI3	Government is taking proper decisions in the right time	-0.076	0.032	-0.09	-2.425	0.015	-0.138	-0.015
	IEI1	There is a chance of community transmission of COVID-19 in Bangladesh	0.118	0.043	0.095	2.748	0.006	0.034	0.202
	GPI1	Bangladesh government can deal with this outbreak	1.847	0.424		4.36	0	1.016	2.678
	HSB4	There is a lack of trained doctors and health professional to deal with the COVID-19	-0.083	0.041	-0.065	-2.041	0.041	-0.162	-0.003
	HSB9	There is a lack of budget or financial support to response to this outbreak	-0.206	0.033	-0.19	-6.164	0	-0.271	-0.14
	GPI2	Government is taking this outbreak seriously to deal with	0.253	0.039	0.248	6.445	0	0.176	0.33
	GPI3	Government is taking proper decisions in the right time	0.149	0.04	0.139	3.719	0	0.071	0.228
	GPI7	The developed nations are going to support Bangladesh in response to COVID-19	0.127	0.038	0.1	3.363	0.001	0.053	0.201
	SEI2	Shut down or lockdown or social distancing will have an economic and social impact in future	0.224	0.062	0.135	3.595	0	0.102	0.346
	SEI3	The formal and informal business will be hampered	-0.225	0.072	-0.126	-3.133	0.002	-0.365	-0.084
	SEI11	There is a chance of social conflict due to this outbreak	0.084	0.04	0.07	2.102	0.036	0.006	0.162
	SEI2	Shut down or lockdown or social distancing will have an economic and social impact in future	-0.238	0.214		-1.112	0.266	-0.657	0.182
	MH3	I am afraid of losing my life or my relatives' life due to this outbreak	0.054	0.023	0.076	2.391	0.017	0.01	0.099
	HSB5	There is a lack of health facilities to combat the COVID-19 outbreak in Bangladesh	0.085	0.038	0.081	2.269	0.023	0.011	0.159
	GPI1	Bangladesh government can deal with this outbreak	0.056	0.016	0.093	3.595	0	0.025	0.086
	GPI3	Government is taking proper decisions in the right time	0.045	0.02	0.069	2.229	0.026	0.005	0.085
	SEI3	The formal and informal business will be hampered	0.517	0.032	0.48	16.078	0	0.454	0.58
	SEI4	Poor people living in hand to mouth will be severely affected	0.098	0.04	0.077	2.484	0.013	0.021	0.176
	SEI8	Price of most of the basic products will be higher than usual	0.049	0.025	0.056	1.954	0.041	0	0.098
	SEI10	The formal education system will be hampered	0.048	0.025	0.054	1.948	0.042	0	0.096
	EEI6	High possibility of severe socio-economic and health crisis	0.084	0.038	0.079	2.247	0.025	0.011	0.158
	IEI1	There is a chance of community transmission of COVID-19 in Bangladesh	0.66	0.242		2.726	0.007	0.185	1.135
	MH1	I am most afraid of coronavirus recent outbreak in Bangladesh	0.078	0.027	0.096	2.889	0.004	0.025	0.131
	MH3	I am afraid of losing my life or my relatives' life due to this outbreak	0.077	0.026	-0.102	-2.99	0.003	-0.128	-0.026
	HSB1	Health system of Bangladesh is fragile to deal with the recent outbreak of COVID-19	0.062	0.023	0.077	2.748	0.006	0.018	0.107
	HSB7	There is a severe lack of bio-medical waste management facilities in Bangladesh	0.169	0.039	0.152	4.355	0	0.093	0.245
	SEI6	Many people will lose their livelihood/ jobs at a time	0.082	0.031	0.086	2.624	0.009	0.021	0.143
	SEI11	There is a chance of social conflict due to this outbreak	0.077	0.023	0.101	3.428	0.001	0.033	0.122
	IEI2	A huge number of people will be infected	0.246	0.028	0.279	8.772	0	0.191	0.301
	IEI3	There is a chance of not detecting most of the infected patients due to lack of health facilities leads to undermining the actual infected case	0.178	0.036	0.168	4.957	0	0.108	0.249
	EEI2	If any disaster (flood, cyclone etc.) occur after the COVID-19 situation then it will create a double burden to the country	0.495	0.195		2.542	0.011	0.113	0.878
	MH2	I am afraid of getting coronavirus	-0.047	0.022	-0.075	-2.121	0.034	-0.09	-0.004
	HSB2	A huge population is a pressure to the existing health system to deal with COVID-19	0.046	0.021	0.059	2.154	0.031	0.004	0.088
	SEI4	Poor people living in hand to mouth will be severely affected	0.09	0.036	0.081	2.491	0.013	0.019	0.161
	SEI9	Poor people will suffer food and nutritional deficiency	0.11	0.031	0.116	3.504	0	0.048	0.171
	IEI5	Lack of bio-medical waste management facilities in Bangladesh will create more problem	0.088	0.031	0.095	2.855	0.004	0.028	0.148
	EEI1	There is a chance of disaster like flood, cyclone, drought etc. in 2020 considering the climate change vulnerability of Bangladesh	0.085	0.018	0.126	4.755	0	0.05	0.12
	EEI3	There is a chance of severe food scarcity due to these events (COVID-19 + Disasters) in the country	0.112	0.024	0.139	4.652	0	0.065	0.16
	EEI4	High possibility of huge economical loss	0.178	0.037	0.174	4.818	0	0.106	0.251
	EEI6	High possibility of severe socio-economic and health crisis	0.07	0.034	0.075	2.038	0.042	0.003	0.138
